# Supplementary material for: Haemosporidians in Non-Passerine Birds of Colombia: An Overview of the Last 20 Years of Research
Source: MDPI journal article supplement (doi:10.3390/d15010057), 2023-01-03
Supplement: s1 [file s1]

## Supplementary Tables

Table S1: Biomes and specific localities of origin of the non-passerine birds samples deposited in the GERPH biological collection included in this study. The localities are numbered as in Fig 2. Coordinates per locality, altitude expressed in meters above the seal level (m asl), and ecological conditions are provided.

| Samples from the wild            |                                                            | Coordinates     | Altitude  | Ecological conditions                                                                                                                                                                                                                                                                                                                                                                                                                                                                                                                                                                                                                                                                                                                                                                                                      |
|----------------------------------|------------------------------------------------------------|-----------------|-----------|----------------------------------------------------------------------------------------------------------------------------------------------------------------------------------------------------------------------------------------------------------------------------------------------------------------------------------------------------------------------------------------------------------------------------------------------------------------------------------------------------------------------------------------------------------------------------------------------------------------------------------------------------------------------------------------------------------------------------------------------------------------------------------------------------------------------------|
| Caribbean region                 |                                                            |                 |           |                                                                                                                                                                                                                                                                                                                                                                                                                                                                                                                                                                                                                                                                                                                                                                                                                            |
| I.                               | Tropical desert zonobiome (of the Guajira and Santa Marta) |                 |           |                                                                                                                                                                                                                                                                                                                                                                                                                                                                                                                                                                                                                                                                                                                                                                                                                            |
| 1.                               | Manaure                                                    | 11.72N, -72.54W | 5         | Warm tropical climate with temperatures ranging 28 to 38°C and annual rainfall of 1000 mm <sup>a</sup> . The vegetation is mostly shrubs, the small trees usually have leathery leaves and thorns; while mangrove forests can be found bordering the coast <sup>b,c</sup> .                                                                                                                                                                                                                                                                                                                                                                                                                                                                                                                                                |
| II.                              | Caribbean halobiome                                        |                 |           |                                                                                                                                                                                                                                                                                                                                                                                                                                                                                                                                                                                                                                                                                                                                                                                                                            |
| 2.                               | Cienaga                                                    | 10.97N, -74.36W | 2         | The Ciénaga Grande del Magdalena is the northern portion of the estuarine delta of this river, declared a Ramsar area, and biosphere reserve. The climate is tropical arid, with temperatures between 27 to 30°C. The average annual rainfall is 817 mm, with 6 -7 dry months a year. The vegetation is mainly mangrove forest <sup>d</sup> .                                                                                                                                                                                                                                                                                                                                                                                                                                                                              |
| III.                             | Caribbean tropical dry zonobiome                           |                 |           |                                                                                                                                                                                                                                                                                                                                                                                                                                                                                                                                                                                                                                                                                                                                                                                                                            |
| 3.                               | Barú                                                       | 10.35N, -75.57W | 0         | The Barú peninsula is in the Caribbean tropical dry zonobiome, in the damping zone of the Rosario corals and San Bernardo National Natural Park (NNP). The climate is coastal tropical with an annual media temperature 27.7°C <sup>e</sup> .                                                                                                                                                                                                                                                                                                                                                                                                                                                                                                                                                                              |
| Andean region                    |                                                            |                 |           |                                                                                                                                                                                                                                                                                                                                                                                                                                                                                                                                                                                                                                                                                                                                                                                                                            |
| IV.                              | High Orobiomes of the Andes                                |                 |           |                                                                                                                                                                                                                                                                                                                                                                                                                                                                                                                                                                                                                                                                                                                                                                                                                            |
| 4.                               | Los Nevados National Natural Park (NNP)                    | 10.35N, -75.57W | 3200-3950 | In the central chain of mountains, between 3200 to 3500 m asl the area is mainly covered by high Andean forest remnants in rocky sheltered areas and paddocks, where the mean temperatures are close the 12°C <sup>f,g</sup> . For eastern cordillera, and the southern colombian range, Andean forest are placed at about 2900 -3000 masl followed by large extensions of frailejon at 3100 masl <sup>b, h, i</sup> , then considering these areas as subparamo <sup>b</sup> . The Paramo area at 3950 masl is very humid areas dominated by grasslands, low-growing vegetation, and large extensions of frailejon. The average temperature is close to 6°C, however, it can reach values below zero at night. In this orobiome, the Otun and Chingaza lake complexes have been designated as RAMSAR areas <sup>l</sup> . |
| 5.                               | Chingaza National Natural Park (NNP)                       | 4.63N, -73.73W  | 2900-3100 |                                                                                                                                                                                                                                                                                                                                                                                                                                                                                                                                                                                                                                                                                                                                                                                                                            |
| 6.                               | Aldana                                                     | 0.95 N, -77.68W | 3014      |                                                                                                                                                                                                                                                                                                                                                                                                                                                                                                                                                                                                                                                                                                                                                                                                                            |
| V. Middle Orobiomes of the Andes |                                                            |                 |           |                                                                                                                                                                                                                                                                                                                                                                                                                                                                                                                                                                                                                                                                                                                                                                                                                            |
| 7.                               | Universidad Nacional de Colombia- Bogotá Campus (UNAL)     | 4.64N, -74.08W  | 2550      | The Campus UNAL is an exception for these conditions since is an urban area where different vegetation patches and corridors are distributed along the city. In this place, the median annual temperature is 15°C; and the annual average rainfall is 1,788 mm <sup>k</sup> .                                                                                                                                                                                                                                                                                                                                                                                                                                                                                                                                              |
| 8.                               |                                                            | 4.71 N, -75.49W | 2400      | The vegetation is multilayered, with the canopy measuring 15 to 20 m, nevertheless at El Cedral,                                                                                                                                                                                                                                                                                                                                                                                                                                                                                                                                                                                                                                                                                                                           |

|                |                                                             |                                          |                 |      |                                                                                                                                                                                                                                                                                                         |
|----------------|-------------------------------------------------------------|------------------------------------------|-----------------|------|---------------------------------------------------------------------------------------------------------------------------------------------------------------------------------------------------------------------------------------------------------------------------------------------------------|
|                |                                                             | Ucumarí National Regional Park (NRP)     |                 |      | paddocks, and herbaceous vegetation are also present <sup>bl</sup> . The temperature ranges between 12 to 18°C, and the annual average rainfall in El cedral and Ucumarí National Regional Park is between 2200 and 2700 mm.                                                                            |
|                | 9.                                                          | El Cedral                                | 4.7 N, -75.53W  | 2100 |                                                                                                                                                                                                                                                                                                         |
|                | 10.                                                         | Quimbaya Flora and Fauna Sanctuary (FFS) | 4.73N, -75.58W  | 1870 | The annual average of temperature and rainfall like the above specified. This area is considered a transition between the sub-Andean and Andean forests, where the mature forest dominates but is accompanied by young natural forests, patches of regenerating vegetation, and wetlands <sup>m</sup> . |
| VI.            | Low Orobiomes of the Andes                                  |                                          |                 |      |                                                                                                                                                                                                                                                                                                         |
|                | 11.                                                         | San Gil                                  | 6.56N, -73.15W  | 1224 |                                                                                                                                                                                                                                                                                                         |
|                | 12.                                                         | Medina                                   | 4.56N, -73.37W  | 590  | Covered by pre-montane forests, with a canopy of about 30 m. The temperatures ranged between 18 and 24°C, and the annual average rainfall is between 1000 and 3000 mm <sup>b</sup> .                                                                                                                    |
| VII.           | Upper Magdalena alternate hygric or subxerophytic zonobiome |                                          |                 |      |                                                                                                                                                                                                                                                                                                         |
|                | 13.                                                         | San Agustín                              | 1.89N, -73.15W  | 2100 | This biome is dominated by grasslands and secondary vegetation. The area has suffered a savanization and desertification processes aided by <sup>b</sup> . The average rainfall is 1448 mm, and the average temperature is 18.1 °C <sup>a</sup>                                                         |
| Orinoco Region |                                                             |                                          |                 |      |                                                                                                                                                                                                                                                                                                         |
| VIII.          | The Amazon-Orinoco peiniobiome                              |                                          |                 |      |                                                                                                                                                                                                                                                                                                         |
|                | 14.                                                         | Yopal                                    | 4.99N, -72.02W  | 165  | The Amazon-Orinoco peiniobiome dominated most of the eastern plains of Colombia. In this peiniobiome, savanna and secondary tropical rainforest and gallery forests were sampled. in places where temperature ranges between 26-29°C, and rainfall are about 2000-3000 mm per year <sup>b</sup>         |
|                | 15.                                                         | Villavicencio                            | 4.165N, -73.66W | 640  |                                                                                                                                                                                                                                                                                                         |
|                | 16.                                                         | San Miguel                               | 4.52N, -71.52W  | 130  |                                                                                                                                                                                                                                                                                                         |
| IX.            | Macarena Orobiome                                           |                                          |                 |      |                                                                                                                                                                                                                                                                                                         |
|                | 17.                                                         | La Macarena NNP                          | 3.34N, -73.94W  | 481  | The sampling places in the Macarena Orobiome are dominated by grasslands and savanna, with a media annual temperature of 24°C and an annual average of rainfall of about 2,973 mm <sup>b</sup> .                                                                                                        |
| X.             | Helobiomes of the Orinoco and the Amazon                    |                                          |                 |      |                                                                                                                                                                                                                                                                                                         |
|                | 18.                                                         | Trinidad                                 | 5.5N, -71.76W   | 181  | The floodplains of the Casanare are part of what is known as the Orinoco helobiome. The vegetation is made up of a grassy herbaceous stratum and a shrubby/arboreal stratum. The average temperature is 27°C with precipitation that oscillates between 1500 and 2000 mm per year <sup>b,n</sup> .      |
|                | 19.                                                         | Paz de Ariporo                           | 5.7N, -71.25W   | 135  |                                                                                                                                                                                                                                                                                                         |
| Amazon Region  |                                                             |                                          |                 |      |                                                                                                                                                                                                                                                                                                         |
|                | Helobiomes of the Orinoco and the Amazon                    |                                          |                 |      |                                                                                                                                                                                                                                                                                                         |
|                | 20.                                                         | Araracuara                               | 1.55N, -72.33W  | 203  | The floodplains of Caqueta river in Araracuara is covered by forests with a wide successional gradient with different sizes of canopy and low understory density. The mean annual temperature is 25°C while the annual rainfall 3060 mm (Benavides et al., 2004).                                       |
| XI.            | Tropical humid Zonobiome of the Orinoco and Amazon          |                                          |                 |      |                                                                                                                                                                                                                                                                                                         |
|                | 21.                                                         | Morelia                                  | 1.48N, -75.72W  | 258  | Tropical humid Zonobiome of the Orinoco and Amazon is covered by forests with dense canopy, vegetation mostly of 25-30 m of height, with                                                                                                                                                                |

|                                                  |     |                                                     |                |      |                                                                                                                                                                                                                                               |
|--------------------------------------------------|-----|-----------------------------------------------------|----------------|------|-----------------------------------------------------------------------------------------------------------------------------------------------------------------------------------------------------------------------------------------------|
|                                                  | 22. | San Francisco                                       | 1.13N, -76.94W | 5    | some protruding crowns of trees, combined with an open understory. Temperature is usually higher than 25°C and, the average rainfall of about 4000 mm as both localities sampled in this zonobiome are in the Andean foothills <sup>b</sup> . |
| Pacific Region                                   |     |                                                     |                |      |                                                                                                                                                                                                                                               |
| XII. Helobiomes of the Cauca Valley              |     |                                                     |                |      |                                                                                                                                                                                                                                               |
|                                                  | 23. | Sonso Lagoon                                        | 3.76N, -77.17W | 934  | RAMSAR area <sup>j</sup> , Constitutes the last large redoubt of lagoon ecosystem of the Cauca Valley. The average temperature is 28 °C and the rainfall oscillates between 1,200 and 1,400 mm/year, in a bimodal regime <sup>o</sup> .       |
| Samples from Rescue centers and Zoological parks |     |                                                     |                |      |                                                                                                                                                                                                                                               |
|                                                  | 24. | Wild Animals Rescue and Rehabilitation Unit (URRAS) | 4.64N, -74.08W | 2550 | The URRAS center is located at the Universidad Nacional de Colombia- Bogotá Campus (UNAL). At this place the environmental conditions of the animal enclosures are controlled.                                                                |
|                                                  | 25. | Ocarros Biopark                                     | 4.18N, -73.61W | 413  | The Ocarros Biopark is located in the vicinity of Villavicencio for which the environmental conditions were already described above.                                                                                                          |

Ecological conditions are according to <sup>a</sup>[96]<sup>b</sup>[67]<sup>c</sup>[97]<sup>d</sup>[98], <sup>e</sup>[99]<sup>f</sup> [100],<sup>g</sup> [101], <sup>h</sup>[102]<sup>i</sup>[103]<sup>j</sup> [104]<sup>k</sup> [105]<sup>l</sup> [106]<sup>m</sup>[98]<sup>n</sup> [107],<sup>o</sup>[108]

Table S2: Non-passerine species found infected with Haemosporidian parasites in the Neotropic after the comprehensive review of White et al., [17]. Species reported infected in this previous revision are indicate with an asterisk after the bird's name species. *P*: *Plasmodium*, *H*: *Haemoproteus*, *L*: *Leucocytozoon*, *F*: *Fallisia*. Presence (1) or absence (0) of each Haemosporidian genus per host species is registered along with the country where each bird was reported. Countries abbreviations are as follows: Argentina (ARG), Barbados (BRB), Belize (BZ), Bolivia (BOL), Brazil (BRA), Cayman Islands (CI), Chile (CHL), Colombia (COL), Costa Rica (CR), Dominican Republic (RD), Ecuador (ECU), Falkland Islands (FI), Guatemala (GT), Guyana (GY), Honduras (HON), Jamaica (JAM), Mexico (MEX), Nicaragua (NIC), Panama (PAN), Peru (PER), Suriname (SRM), Uruguay (UR), and Venezuela (VEN). References are numbered as in the Table S4.

| Species                          | Haemosporidian parasite |   |   |   | Country  | Reference             |
|----------------------------------|-------------------------|---|---|---|----------|-----------------------|
|                                  | H                       | L | P | F |          |                       |
| Accipitriformes                  |                         |   |   |   |          |                       |
| Accipitridae                     |                         |   |   |   |          |                       |
| <i>Buteo brachyurus</i>          | 0                       | 0 | 1 | 0 | BRA      | 101                   |
| <i>Buteo galapagoensis</i>       | 1                       | 0 | 0 | 0 | ECU      | 88                    |
| <i>Buteo nitidus</i>             | 0                       | 0 | 1 | 0 | BRA      | 42                    |
| <i>Buteo platypterus</i> *       | 1                       | 0 | 0 | 0 | COL      | 97                    |
| <i>Buteogallus anthracinus</i> * | 0                       | 0 | 1 | 0 | VEN      | 46                    |
| <i>Buteogallus urubitinga</i>    | 0                       | 0 | 1 | 0 | BRA      | 23                    |
| <i>Harpagus diodon</i>           | 0                       | 0 | 1 | 0 | BRA      | 75                    |
| <i>Ictinia plumbea</i> *         | 0                       | 0 | 1 | 0 | BRA      | 86                    |
| <i>Rostrhamus sociabilis</i>     | 0                       | 0 | 1 | 0 | BRA      | 75                    |
| <i>Rupornis magnirostris</i> *   | 1                       | 0 | 1 | 0 | BRA, COL | 4, 7, 51, 75, 99, 101 |
| Cathartidae                      |                         |   |   |   |          |                       |
| <i>Sarcoramphus papa</i>         | 0                       | 0 | 1 | 0 | BRA      | 23, 29                |
| Anseriformes                     |                         |   |   |   |          |                       |
| Anatidae                         |                         |   |   |   |          |                       |
| <i>Alopochen aegyptiacus</i>     | 0                       | 0 | 1 | 0 | BRA      | 21,23                 |
| <i>Amazonetta brasiliensis</i>   | 0                       | 1 | 1 | 0 | BRA, VEN | 23, 38, 40, 42, 46    |
| <i>Anas cyanoptera</i>           | 1                       | 0 | 1 | 0 | CHL, PER | 8,93                  |
| <i>Anas discors</i>              | 1                       | 0 | 0 | 0 | COL      | 52                    |
| <i>Anas flavirostris</i>         | 0                       | 1 | 0 | 0 | PER      | 93                    |
| <i>Anas georgica</i>             | 1                       | 0 | 1 | 0 | CHL, PER | 8, 93                 |
| <i>Anser cygnoides</i>           | 0                       | 0 | 1 | 0 | BRA      | 23                    |
| <i>Cairina moschata</i>          | 1                       | 0 | 1 | 0 | COL, VEN | 14, 52, 60            |
| <i>Cereopsis novaehollandiae</i> | 0                       | 0 | 1 | 0 | BRA      | 23                    |
| <i>Coscoroba coscoroba</i>       | 0                       | 0 | 1 | 0 | BRA      | 23                    |
| <i>Cygnus atratus</i>            | 0                       | 0 | 1 | 0 | BRA      | 23                    |
| <i>Cygnus melancoryphus</i>      | 0                       | 0 | 1 | 0 | BRA      | 23                    |
| <i>Dendrocygna autumnalis</i> *  | 1                       | 0 | 1 | 0 | COL, VEN | 46, 68                |
| <i>Dendrocygna bicolor</i>       | 0                       | 0 | 1 | 0 | ARG      | 93                    |
| <i>Dendrocygna viduata</i> *     | 0                       | 0 | 1 | 0 | BRA, VEN | 22, 23, 46            |
| <i>Merganetta armata</i>         | 0                       | 1 | 0 | 0 | PER      | 93                    |
| <i>Neochen jubata</i>            | 1                       | 0 | 1 | 0 | BRA      | 115                   |

|                                |   |   |   |   |     |    |
|--------------------------------|---|---|---|---|-----|----|
| <i>Netta erythrophthalma</i>   | 0 | 0 | 1 | 0 | BRA | 23 |
| <i>Oxyura jamaicensis</i>      | 1 | 1 | 0 | 0 | PER | 93 |
| <i>Plectropterus gambensis</i> | 0 | 0 | 1 | 0 | BRA | 23 |
| <i>Tadorna ferruginea</i>      | 0 | 0 | 1 | 0 | BRA | 23 |
| <i>Tadorna variegata</i>       | 0 | 0 | 1 | 0 | BRA | 23 |

#### Apodiformes

##### Trochilidae

|                                     |   |   |   |   |               |                           |
|-------------------------------------|---|---|---|---|---------------|---------------------------|
| <i>Adelomyia melanogenys</i>        | 1 | 0 | 1 | 0 | COL, ECU, PER | 1, 51, 54, 62, 69, 74, 97 |
| <i>Aglaeactis castelnaudii</i>      | 1 | 1 | 1 | 0 | PER           | 69                        |
| <i>Aglaeactis cupripennis</i>       | 1 | 0 | 1 | 0 | PER           | 69                        |
| <i>Aglaiocercus coelestis</i>       | 0 | 0 | 1 | 0 | ECU           | 1                         |
| <i>Aglaiocercus kingi</i>           | 1 | 1 | 0 | 0 | PER           | 69                        |
| <i>Amazilia alticola</i>            | 1 | 0 | 0 | 0 | ECU           | 74                        |
| <i>Amazilia amabilis</i>            | 1 | 0 | 0 | 0 | PAN           | 95                        |
| <i>Amazilia amazilia</i>            | 1 | 0 | 1 | 0 | PER           | 69                        |
| <i>Amazilia beryllina</i>           | 1 | 0 | 0 | 0 | MEX           | 39                        |
| <i>Amazilia chionogaster</i>        | 1 | 0 | 1 | 0 | PER           | 49,64,69                  |
| <i>Amazilia edward</i>              | 1 | 0 | 0 | 0 | PAN           | 95                        |
| <i>Amazilia fimbriata</i>           | 0 | 0 | 1 | 0 | PER           | 49                        |
| <i>Amazilia lactea</i>              | 0 | 0 | 1 | 0 | PER           | 49                        |
| <i>Amazilia saucerottei</i>         | 1 | 0 | 0 | 0 | CR            | 104                       |
| <i>Amazilia tzacatl</i>             | 1 | 0 | 0 | 0 | COL, PAN      | 29, 95                    |
| <i>Amazilia violiceps</i>           | 1 | 0 | 0 | 0 | MEX           | 53                        |
| <i>Amazilia viridicauda</i>         | 1 | 0 | 0 | 0 | PER           | 69                        |
| <i>Anthracothonax nigricollis</i>   | 1 | 0 | 0 | 0 | COL, PAN      | 29, 95                    |
| <i>Archilochus colubris</i>         | 1 | 0 | 0 | 0 | CR, PER       | 104, 116                  |
| <i>Boissonneaua flavescens</i>      | 1 | 0 | 1 | 0 | COL, ECU      | 1,29,97                   |
| <i>Boissonneaua matthewsii</i>      | 1 | 0 | 0 | 0 | ECU           | 74                        |
| <i>Campylopterus falcatus</i>       | 1 | 0 | 0 | 0 | COL           | 29                        |
| <i>Campylopterus largipennis</i>    | 0 | 0 | 1 | 0 | PER           | 69                        |
| <i>Campylopterus villaviscensio</i> | 1 | 0 | 0 | 0 | PER           | 69                        |
| <i>Chaetocercus mulsant</i>         | 1 | 0 | 0 | 0 | PER           | 69                        |
| <i>Chaetura andrei</i>              | 1 | 0 | 0 | 0 | BRA           | 12, 17                    |
| <i>Chaetura spinicaudus</i>         | 1 | 0 | 0 | 0 | GY            | 30                        |
| <i>Chalcostigma herrani</i>         | 1 | 0 | 1 | 0 | PER           | 69                        |
| <i>Chalcostigma ruficeps</i>        | 1 | 0 | 0 | 0 | PER           | 69                        |
| <i>Chalcostigma stanleyi</i>        | 1 | 0 | 0 | 0 | PER           | 69                        |
| <i>Chalybura buffonii</i>           | 1 | 0 | 0 | 0 | COL, PAN      | 84, 95                    |
| <i>Chlorestes julie</i>             | 1 | 0 | 0 | 0 | PAN           | 95                        |
| <i>Chlorostilbon swainsonii</i>     | ? | ? | ? | ? | RD            | 56                        |
| <i>Chrysuronia oenone</i>           | 1 | 0 | 0 | 0 | PER           | 69                        |
| <i>Clytolaema rubricauda</i>        | 0 | 0 | 1 | 0 | BRA           | 5                         |
| <i>Coeligena coeligena</i>          | 1 | 1 | 1 | 0 | PER           | 37, 69                    |
| <i>Coeligena helianthea</i>         | 0 | 1 | 0 | 0 | COL           | 61, 62, 67                |

|                                   |   |   |   |   |                                   |                                      |
|-----------------------------------|---|---|---|---|-----------------------------------|--------------------------------------|
| <i>Coeligena iris</i>             | 1 | 1 | 1 | 0 | ECU, PER                          | 69, 74                               |
| <i>Coeligena torquata</i>         | 1 | 1 | 1 | 0 | ECU, PER                          | 1,69,74                              |
| <i>Coeligena violifer</i>         | 1 | 1 | 1 | 0 | PER                               | 69                                   |
| <i>Coeligena wilsoni</i>          | 0 | 0 | 1 | 0 | ECU                               | 1                                    |
| <i>colibri corruscans</i>         | 1 | 0 | 1 | 0 | COL, PER                          | 29,49,64, 69                         |
| <i>Colibri cyanotus</i>           | 1 | 0 | 0 | 0 | COL                               | 29                                   |
| <i>Colibri serrirostris</i>       | 1 | 0 | 0 | 0 | BRA                               | 117                                  |
| <i>Colibri thalassinus*</i>       | 1 | 1 | 1 | 0 | ECU, MEX, PER                     | 39, 69, 74                           |
| <i>Cypseloides fumigatus</i>      | 0 | 0 | 1 | 0 | BRA                               | 27                                   |
| <i>Cypseloides rutilus</i>        | 1 | 0 | 0 | 0 | PER                               | 37, 69                               |
| <i>Cypseloides senex</i>          | 0 | 0 | 1 | 0 | BRA                               | 27                                   |
| <i>Doryfera ludoviciae</i>        | 0 | 1 | 1 | 0 | PER                               | 69                                   |
| <i>Ensifera ensifera</i>          | 1 | 0 | 0 | 0 | COL                               | 51, 61, 62                           |
| <i>Eriocnemis cupreovertris</i>   | 1 | 0 | 0 | 0 | COL                               | 51, 61, 62                           |
| <i>Eriocnemis derbyi</i>          | 1 | 0 | 0 | 0 | COL                               | 51, 61, 62                           |
| <i>Eriocnemis vestita</i>         | 1 | 0 | 0 | 0 | COL, ECU                          | 51, 74                               |
| <i>Eupetomena macroura*</i>       | 1 | 1 | 0 | 0 | BRA                               | 38, 40, 41                           |
| <i>Eutoxeres aquila*</i>          | 1 | 0 | 1 | 0 | COL, ECU                          | 54, 116                              |
| <i>Eutoxeres condamini</i>        | 1 | 1 | 1 | 0 | PER                               | 69                                   |
| <i>Florisuga mellivora</i>        | 1 | 0 | 0 | 0 | COL, PER<br>BRA, COL, PAN,<br>PER | 29, 69<br>29, 38, 40, 41, 69, 95, 97 |
| <i>Glaucidium hirsutum</i>        | 1 | 1 | 1 | 0 | COL, PER                          | 69, 67                               |
| <i>Helianthus amethysticollis</i> | 1 | 1 | 0 | 0 | COL                               | 51, 61, 62                           |
| <i>Helianthus exortis</i>         | 1 | 1 | 0 | 0 | COL                               | 51, 61, 62                           |
| <i>Helianthus micraster</i>       | 1 | 0 | 0 | 0 | PER                               | 69                                   |
| <i>Helianthus viola</i>           | 1 | 1 | 0 | 0 | PER, ECU                          | 69,74                                |
| <i>Heliodoxa aurescens</i>        | 1 | 0 | 0 | 0 | PER                               | 69                                   |
| <i>Heliodoxa imperatrix</i>       | 0 | 0 | 1 | 0 | ECU                               | 1                                    |
| <i>Heliodoxa jacula</i>           | 0 | 0 | 1 | 0 | ECU                               | 1                                    |
| <i>Heliodoxa leadbeateri</i>      | 1 | 1 | 1 | 0 | PER                               | 40, 69                               |
| <i>Heliodoxa rubinoides</i>       | 0 | 0 | 1 | 0 | ECU, PER                          | 1,5, 37, 40, 69, 73                  |
| <i>Heliodoxa rubricauda</i>       | 0 | 0 | 1 | 0 | BRA                               | 5                                    |
| <i>Heliodoxa schreibersii</i>     | 1 | 0 | 0 | 0 | ECU                               | 73                                   |
| <i>Hylocharis chrysura</i>        | 1 | 0 | 0 | 0 | BRA                               | 38,42                                |
| <i>Hylocharis leucotis</i>        | 1 | 0 | 0 | 0 | MEX                               | 29                                   |
| <i>Lafresnaya lafresnayi</i>      | 1 | 0 | 0 | 0 | COL, ECU, PER                     | 62, 69, 97                           |
| <i>Lesbia nuna</i>                | 1 | 1 | 1 | 0 | PER                               | 69                                   |
| <i>Lesbia victoriae</i>           | 1 | 0 | 0 | 0 | PER                               | 69                                   |
| <i>Mellisuga minima</i>           | 0 | 0 | 1 | 0 | JAM                               | 10                                   |
| <i>Metallura eupogon</i>          | 1 | 0 | 0 | 0 | PER                               | 69                                   |
| <i>Metallura phoebe</i>           | 1 | 0 | 0 | 0 | PER                               | 69                                   |
| <i>Metallura tyrianthina</i>      | 1 | 1 | 1 | 0 | COL, ECU, PER                     | 50, 67, 69, 74                       |
| <i>Ocreatus underwoodii</i>       | 1 | 1 | 1 | 0 | ECU, PER                          | 1                                    |
| <i>Opisthoprora euryptera</i>     | 0 | 1 | 0 | 0 | COL                               | 83                                   |
| <i>Oreonympha nobilis</i>         | 0 | 0 | 1 | 0 | PER                               | 69                                   |



|                                |   |   |   |   |                                        |                                                                                                            |
|--------------------------------|---|---|---|---|----------------------------------------|------------------------------------------------------------------------------------------------------------|
| <i>Jacana jacana*</i>          | 0 | 0 | 1 | 0 | VEN                                    | 46                                                                                                         |
| Laridae                        |   |   |   |   |                                        |                                                                                                            |
| <i>Anous stolidus</i>          | 1 | 0 | 0 | 0 | BRA                                    | 81                                                                                                         |
| <i>Creagrus furcatus</i>       | 1 | 0 | 0 | 0 | ECU                                    | 58, 59                                                                                                     |
| <i>Leucophaeus scoresbii</i>   | 1 | 0 | 0 | 0 | FI                                     | 80                                                                                                         |
| <i>Rynchops niger</i>          | 1 | 0 | 1 | 0 | BRA                                    | 85                                                                                                         |
| Scolopacidae                   |   |   |   |   |                                        |                                                                                                            |
| <i>Actitis macularia</i>       | 1 | 0 | 0 | 0 | COL                                    | 90                                                                                                         |
| <i>Calidris fuscicollis</i>    | 1 | 0 | 0 | 0 | ARG                                    | 94                                                                                                         |
| <i>Numenius phaeopus</i>       | 1 | 0 | 0 | 0 | COL                                    | 51, 61, 62, 97                                                                                             |
| Ciconiiformes                  |   |   |   |   |                                        |                                                                                                            |
| Ciconiidae                     |   |   |   |   |                                        |                                                                                                            |
| <i>Ciconia maguari*</i>        | 0 | 0 | 1 | 0 | VEN                                    | 46                                                                                                         |
| <i>Jabiru mycteria</i>         | 0 | 0 | 1 | 0 | VEN                                    | 46                                                                                                         |
| <i>Mycteria americana*</i>     | 1 | 1 | 1 | 0 | BRA, CR, VEN                           | 38, 40, 42, 46, 104, 114,                                                                                  |
| Columbiformes                  |   |   |   |   |                                        |                                                                                                            |
| Columbidae                     |   |   |   |   |                                        |                                                                                                            |
| <i>Claravis pretiosa*</i>      | 1 | 0 | 1 | 0 | BRA, BOL, COL,<br>PAN, PER             | 7, 13, 35, 42, 55, 69, 95, 97                                                                              |
| <i>Columba livia</i>           | 1 | 0 | 0 | 1 | BRA, COL, ECU,<br>VEN                  | 20, 22, 25, 47, 89                                                                                         |
| <i>Columbina buckleyi</i>      | 1 | 0 | 0 | 0 | ECU                                    | 89, 105                                                                                                    |
| <i>Columbina cruziana*</i>     | 1 | 0 | 0 | 0 | PER                                    | 49, 69, 89                                                                                                 |
| <i>Columbina inca</i>          | 1 | 0 | 1 | 0 | CR, MEX, GT                            | 53, 89, 104                                                                                                |
| <i>Columbina minuta*</i>       | 1 | 0 | 1 | 0 | BRA, COL, VEN                          | 3, 7, 37, 41, 43, 91, 102<br>10, 30, 35, 36, 41, 53, 56,                                                   |
| <i>Columbina passerina*</i>    | 1 | 0 | 1 | 0 | BRA, COL, CR,<br>JAM, MEX, UR          | 79, 84, 89, 91, 97, 102,<br>104, 106                                                                       |
| <i>Columbina picui*</i>        | 1 | 0 | 1 | 0 | ARG, BRA                               | 37, 38, 42, 43, 94                                                                                         |
| <i>Columbina squammata*</i>    | 1 | 0 | 1 | 0 | COL, BRA, VEN                          | 2, 37, 43, 55, 84, 89, 91,<br>97, 102                                                                      |
| <i>Columbina talpacoti*</i>    | 1 | 1 | 1 | 0 | BRA, COL, GT,<br>PAN, PER, VEN         | 2, 15, 34,<br>35, 36, 37, 38, 41, 42, 43, 49, 55,<br>60, 66, 69, 89, 91, 95, 97, 99,<br>100, 102, 105, 117 |
| <i>Geotrygon chrysis</i>       | 1 | 0 | 0 | 0 | RD                                     | 56                                                                                                         |
| <i>Geotrygon frenata</i>       | 1 | 1 | 0 | 0 | PER                                    | 37, 69                                                                                                     |
| <i>Geotrygon linearis</i>      | 1 | 0 | 0 | 0 | VEN                                    | 72                                                                                                         |
| <i>Geotrygon montana*</i>      | 1 | 0 | 1 | 0 | BRA, ECU, PER,<br>VEN                  | 15, 35, 36, 49, 69, 73, 89,<br>117                                                                         |
| <i>Leptotila plumbeiceps</i>   | 1 | 0 | 0 | 0 | MEX                                    | 89, 105                                                                                                    |
| <i>Leptotila rufaxilla</i>     | 1 | 0 | 1 | 0 | BRA, COL, ECU,<br>GY                   | 3, 7, 30, 35, 36, 37, 41, 55,<br>89                                                                        |
| <i>Leptotila verreauxi</i>     | 1 | 0 | 1 | 0 | BRA, COL ECU,<br>MEX, PAN,<br>PER, VEN | 3, 30, 37, 38, 41, 43, 46,<br>49, 55, 66, 69, 84, 89, 91,<br>95                                            |
| <i>Metriopelia ceciliae</i>    | 0 | 0 | 1 | 0 | PER                                    | 79                                                                                                         |
| <i>Metriopelia melanoptera</i> | 0 | 1 | 1 | 0 | CHL, PER                               | 40, 69                                                                                                     |



|                                 |   |   |   |   |                                         |                                                        |
|---------------------------------|---|---|---|---|-----------------------------------------|--------------------------------------------------------|
| <i>Patagioenas cayennensis*</i> | 1 | 0 | 0 | 0 | COL                                     | 97                                                     |
| <i>Patagioenas fasciata*</i>    | 1 | 0 | 0 | 0 | PER                                     | 69                                                     |
| <i>Patagioenas leucocephala</i> | 1 | 0 | 0 | 0 | JAM                                     | 10                                                     |
| <i>Patagioenas plumbea</i>      | 1 | 0 | 0 | 0 | BRA, PER                                | 37, 69                                                 |
| <i>Patagioenas speciosa</i>     | 1 | 0 | 0 | 0 | CR                                      | 104                                                    |
|                                 |   |   |   |   | ARG, BRA, CHL,<br>COL, ECU, PER,<br>VEN | 2,3, 7, 37, 38, 46, 49, 51,<br>62, 63, 77, 84, 89, 102 |
| <i>Zenaida auriculata*</i>      | 1 | 0 | 1 | 0 |                                         |                                                        |
| <i>Zenaida aurita*</i>          | 1 | 0 | 1 | 0 | JAM, RD, VEN                            | 10, 56, 89                                             |
| <i>Zenaida galapagoensis</i>    | 1 | 0 | 0 | 0 | ECU                                     | 58, 88, 89, 105                                        |
| <i>Zenaida graysoni</i>         | 1 | 0 | 0 | 0 | MEX                                     | 17,118                                                 |
| <i>Zenaida macroura*</i>        | 1 | 0 | 0 | 0 | MEX                                     | 17,89                                                  |
| <i>Zenaida meloda</i>           | 1 | 0 | 1 | 0 | PER                                     | 79,89                                                  |
| <i>Zentrygon frenata</i>        | 1 | 0 | 0 | 0 | COL                                     | 97                                                     |
| Coraciiformes                   |   |   |   |   |                                         |                                                        |
| Alcedinidae                     |   |   |   |   |                                         |                                                        |
| <i>Chloroceryle aenea</i>       | 1 | 1 | 1 | 0 | BRA, PAN                                | 35, 40, 95                                             |
| <i>Chloroceryle amazona*</i>    | 1 | 0 | 0 | 0 | BRA                                     | 42                                                     |
| <i>Chloroceryle americana</i>   | 1 | 1 | 0 | 0 | BRA                                     | 38, 40, 42                                             |
| <i>Chloroceryle inda</i>        | 1 | 0 | 0 | 0 | BRA                                     | 35, 42                                                 |
| <i>Megaceryle torquata</i>      | 1 | 0 | 0 | 0 | BRA                                     | 42                                                     |
| Momotidae                       |   |   |   |   |                                         |                                                        |
| <i>Baryphthengus martii</i>     | 1 | 0 | 0 | 0 | PER                                     | 69                                                     |
| <i>Electron platyrhynchum</i>   | 1 | 0 | 0 | 0 | PER                                     | 69                                                     |
| <i>Momotus lessonii</i>         | 0 | 1 | 0 | 0 | NIC                                     | 40                                                     |
| <i>Momotus momota*</i>          | 0 | 1 | 0 | 0 | NIC                                     | 40                                                     |
| Todidae                         |   |   |   |   |                                         |                                                        |
| <i>Todus subblatus</i>          | 1 | 0 | 0 | 0 | RD                                      | 56                                                     |
| Cuculiformes                    |   |   |   |   |                                         |                                                        |
| Cuculidae                       |   |   |   |   |                                         |                                                        |
| <i>Coccyzus longirostris</i>    | ? | ? | ? | ? | RD                                      | 56                                                     |
| <i>Coccyzus melacoryphus</i>    | 1 | 0 | 0 | 0 | BRA                                     | 55                                                     |
| <i>Crotophaga ani*</i>          | 0 | 0 | 1 | 0 | VEN                                     | 91                                                     |
| <i>Piaya cayana*</i>            | 1 | 0 | 1 | 0 | BRA, PER                                | 35, 37, 49, 69                                         |
| Falconiformes                   |   |   |   |   |                                         |                                                        |
| Falconidae                      |   |   |   |   |                                         |                                                        |
| <i>Caracara plancus*</i>        | 1 | 0 | 1 | 0 | BRA, VEN                                | 46, 75, 99, 100, 101                                   |
| <i>Falco deiroleucus</i>        | 0 | 0 | 1 | 0 | BRA                                     | 75                                                     |
| <i>Falco peregrinus</i>         | 0 | 0 | 1 | 0 | BRA, VEN                                | 77,101                                                 |
| <i>Falco sparverius*</i>        | 1 | 1 | 1 | 0 | BRA, MEX, RD                            | 56, 75, 98                                             |
| <i>Ibycter americanus</i>       | 1 | 0 | 0 | 0 | BRA                                     | 36                                                     |
| <i>Micrastur gilvicolis</i>     | 1 | 0 | 0 | 0 | BRA                                     | 35                                                     |
| <i>Micrastur mintoni</i>        | 1 | 0 | 1 | 0 | BRA                                     | 35, 36                                                 |
| <i>Micrastur ruficollis*</i>    | 1 | 0 | 0 | 0 | BRA, PAN                                | 36, 95, 117                                            |
| <i>Micrastur semitorquatus</i>  | 0 | 0 | 1 | 0 | BRA                                     | 35                                                     |

|                                  |   |   |   |   |               |                        |
|----------------------------------|---|---|---|---|---------------|------------------------|
| <i>Milvago chimachima</i>        | 0 | 1 | 1 | 0 | BRA, CHL      | 75, 87                 |
| Galbuliformes                    |   |   |   |   |               |                        |
| Bucconidae                       |   |   |   |   |               |                        |
| <i>Bucco capensis</i>            | 1 | 0 | 0 | 0 | BRA           | 36                     |
| <i>Bucco macrodactylus</i>       | 1 | 0 | 0 | 0 | PER           | 69                     |
| <i>Bucco tamatia</i>             | 1 | 0 | 0 | 0 | BRA           | 36                     |
| <i>Malacoptila fulvogularis</i>  | 0 | 1 | 0 | 0 | PER           | 69                     |
| <i>Malacoptila rufa</i>          | 1 | 0 | 1 | 0 | BRA           | 35,36                  |
| <i>Malacoptila striata</i>       | 0 | 0 | 1 | 0 | BRA           | 55                     |
| <i>Monasa flavirostris</i>       | 1 | 0 | 1 | 0 | PER           | 69                     |
| <i>Monasa morphoeus</i>          | 0 | 0 | 1 | 0 | BRA, PER      | 36, 69                 |
| <i>Nonnula rubecula</i>          | 0 | 0 | 1 | 0 | BRA           | 55                     |
| <i>Nystalus chacuru*</i>         | 1 | 0 | 1 | 0 | BRA           | 12, 34, 35, 117        |
| <i>Nystalus maculatus</i>        | 1 | 0 | 0 | 0 | BRA           | 34, 35, 38             |
| <i>Malacoptila fusca</i>         | 1 | 0 | 0 | 0 | ECU, PER      | 49                     |
| <i>Monasa nigrifrons</i>         | 1 | 0 | 1 | 0 | BRA, COL, PER | 28, 35, 45, 49, 69, 97 |
| <i>Notharchus macrorhynchos*</i> | 1 | 0 | 0 | 0 | PAN           | 95                     |
| Galbulidae                       |   |   |   |   |               |                        |
| <i>Galbula albirostris</i>       | 0 | 0 | 1 | 0 | BRA           | 35                     |
| <i>Galbula cyanicollis</i>       | 1 | 0 | 1 | 0 | BRA           | 35                     |
| <i>Galbula flavogaster</i>       | 1 | 0 | 0 | 0 | BRA           | 28                     |
| <i>Galbula ruficauda*</i>        | 1 | 0 | 1 | 0 | BRA, COL      | 28, 38, 41, 55, 97     |
| Galliformes                      |   |   |   |   |               |                        |
| Cracidae                         |   |   |   |   |               |                        |
| <i>Aburria jacutinga</i>         | 1 | 0 | 0 | 0 | BRA           | 44                     |
| <i>Chamaepetes goudotii</i>      | 1 | 0 | 0 | 0 | PER           | 49                     |
| <i>Crax rubra*</i>               | 1 | 0 | 0 | 0 | CR            | 104                    |
| <i>Mitu tomentosum</i>           | 0 | 0 | 1 | 0 | BRA           | 23                     |
| <i>Mitu tuberosum</i>            | 1 | 0 | 1 | 0 | PER           | 121                    |
| <i>Nothocrax urumutum</i>        | 0 | 0 | 1 | 0 | BRA           | 23                     |
| <i>Ortalis canicollis*</i>       | 1 | 0 | 0 | 0 | BRA           | 42                     |
| <i>Ortalis ruficauda*</i>        | 1 | 0 | 0 | 0 | COL, VEN      | 3,11                   |
| <i>Penelope jacquacu</i>         | 1 | 0 | 1 | 0 | PER           | 49, 65, 121            |
| <i>Penelope obscura*</i>         | 1 | 0 | 0 | 0 | BRA           | 23                     |
| <i>Penelope purpurascens*</i>    | 1 | 0 | 0 | 0 | PAN           | 95                     |
| <i>Penelope superciliiaris*</i>  | 0 | 0 | 1 | 0 | BRA           | 22                     |
| <i>Pipile cujubi</i>             | 1 | 0 | 0 | 0 | BRA           | 36                     |
| <i>Pipile cumanensis</i>         | 1 | 0 | 1 | 0 | PER           | 121                    |
| <i>Pipile jacutinga</i>          | 1 | 0 | 1 | 0 | BRA           | 23, 45, 76             |
| Phasianidae                      |   |   |   |   |               |                        |
| <i>Gallus gallus</i>             | 0 | 0 | 1 | 0 | BRA, COL      | 31,6                   |
| <i>Pavo cristatus</i>            | 0 | 0 | 1 | 0 | BRA           | 23, 26                 |
| Gruiformes                       |   |   |   |   |               |                        |
| Rallidae                         |   |   |   |   |               |                        |

|                                   |   |   |   |   |                       |                |
|-----------------------------------|---|---|---|---|-----------------------|----------------|
| <i>Aramides cajaneus*</i>         | 0 | 0 | 1 | 0 | BRA, VEN              | 23, 46         |
| <i>Pardirallus sanguinolentus</i> | 1 | 0 | 0 | 0 | UR                    | 30             |
| <i>Porphyrio martinica</i>        | 0 | 0 | 1 | 0 | COL                   | 97             |
| Psophiidae                        |   |   |   |   |                       |                |
| <i>Psophia leucoptera</i>         | 1 | 0 | 1 | 0 | BRA, PER              | 35, 121        |
| Musophagiformes                   |   |   |   |   |                       |                |
| Musophagidae                      |   |   |   |   |                       |                |
| <i>Musophaga violacea</i>         | 0 | 0 | 1 | 0 | BRA                   | 23,29          |
| Opisthocomiformes                 |   |   |   |   |                       |                |
| Opisthocomidae                    |   |   |   |   |                       |                |
| <i>Opisthocomus hoazin</i>        | 0 | 0 | 1 | 0 | VEN                   | 78             |
| Pelecaniformes                    |   |   |   |   |                       |                |
| Ardeidae                          |   |   |   |   |                       |                |
| <i>Agamia agami</i>               | 0 | 0 | 1 | 0 | GY                    | 30             |
| <i>Ardea alba*</i>                | 0 | 0 | 1 | 0 | BRA, UR               | 24, 30, 38, 42 |
| <i>Ardea cocoi*</i>               | 0 | 0 | 1 | 0 | BRA, VEN              | 38, 42, 46     |
| <i>Ardea herodias</i>             | 0 | 0 | 1 | 0 | VEN                   | 46             |
| <i>Botaurus pinnatus*</i>         | 0 | 0 | 1 | 0 | VEN                   | 46             |
| <i>Bubulcus ibis</i>              | 0 | 0 | 1 | 0 | VEN                   | 46             |
| <i>Butorides striata*</i>         | 0 | 0 | 1 | 0 | GY, COL               | 30,97          |
| <i>Cochlearius cochlearius</i>    | 0 | 0 | 1 | 0 | VEN                   | 46             |
| <i>Egretta alba</i>               | 0 | 0 | 1 | 0 | VEN                   | 46             |
| <i>Egretta thula</i>              | 0 | 0 | 1 | 0 | VEN                   | 46             |
| <i>Ixobrychus exilis</i>          | 0 | 0 | 1 | 0 | VEN                   | 46             |
| <i>Nycticorax nycticorax</i>      | 0 | 0 | 1 | 0 | BRA, VEN              | 22             |
| <i>Nycticorax violaceus</i>       | 0 | 0 | 1 | 0 | VEN                   | 46             |
| <i>Pilherodius pileatus</i>       | 0 | 0 | 1 | 0 | VEN                   | 46             |
| <i>Syrigma sibilatrix</i>         | 0 | 0 | 1 | 0 | VEN                   | 46             |
| <i>Tigrisoma lineatum</i>         | 1 | 0 | 1 | 0 | BRA, VEN              | 42,46          |
| Fregatidae                        |   |   |   |   |                       |                |
| <i>Fregata magnificens*</i>       | 1 | 0 | 1 | 0 | BZ, CI, ECU, MEX, PAN | 58, 71         |
| <i>Fregata minor</i>              | 1 | 0 | 0 | 0 | ECU                   | 58             |
| Phalacrocoracidae                 |   |   |   |   |                       |                |
| <i>Phalacrocorax brasilianus</i>  | 0 | 1 | 1 | 0 | CHL                   | 82             |
| Threskiornithidae                 |   |   |   |   |                       |                |
| <i>Mesembrinibis cayennensis*</i> | 1 | 0 | 1 | 0 | BRA, VEN              | 38             |
| <i>Eudocimus ruber*</i>           | 1 | 0 | 1 | 0 | BRA, VEN              | 23,29,46       |
| <i>Platalea ajaja</i>             | 1 | 1 | 1 | 0 | BRA, VEN              | 23, 40, 46     |
| <i>Theristicus caudatus</i>       | 0 | 0 | 1 | 0 | VEN                   | 46             |
| Phoenicopteriformes               |   |   |   |   |                       |                |
| Phoenicopteridae                  |   |   |   |   |                       |                |
| <i>Phoenicopus chilensis</i>      | 0 | 0 | 1 | 0 | BRA                   | 23             |
| Piciformes                        |   |   |   |   |                       |                |

Picidae

|                                 |   |   |   |   |          |            |
|---------------------------------|---|---|---|---|----------|------------|
| <i>Campephilus rubricollis</i>  | 1 | 0 | 0 | 0 | BRA, PER | 35, 48, 69 |
| <i>Celeus flavescens</i>        | 1 | 0 | 1 | 0 | BRA      | 55, 117    |
| <i>Colaptes atricollis</i>      | 0 | 1 | 1 | 0 | PER      | 69         |
| <i>Colaptes campestris*</i>     | ? | ? | ? | ? | BRA      | 99         |
| <i>Colaptes melanochloros</i>   | 1 | 0 | 1 | 0 | BRA      | 38,43      |
| <i>Colaptes rivolii</i>         | 0 | 1 | 1 | 0 | PER      | 69         |
| <i>Colaptes rupicola</i>        | 1 | 1 | 0 | 0 | PER      | 69         |
| <i>Dryocopus lineatus*</i>      | 0 | 0 | 1 | 0 | BRA      | 55         |
| <i>Melanerpes cactorum</i>      | 0 | 0 | 1 | 0 | BRA      | 38         |
| <i>Melanerpes formicivorus</i>  | 0 | 1 | 0 | 0 | NIC      | 40         |
| <i>Melanerpes rubricapillus</i> | 1 | 0 | 0 | 0 | PAN      | 95         |
| <i>Piculus aurulentus</i>       | 1 | 0 | 0 | 0 | BRA      | 117        |
| <i>Piculus flavigula</i>        | 0 | 0 | 1 | 0 | BRA      | 35         |
| <i>Piculus rubiginosus</i>      | 1 | 0 | 0 | 0 | PER      | 69         |
| <i>Picumnus albosquamatus</i>   | 1 | 0 | 0 | 0 | BRA      | 28         |
| <i>Picumnus subtilis</i>        | 1 | 0 | 0 | 0 | PER      | 69         |
| <i>Veniliornis affinis</i>      | 0 | 0 | 1 | 0 | BRA      | 35         |
| <i>Veniliornis callonotus</i>   | 1 | 0 | 0 | 0 | PER      | 69         |
| <i>Veniliornis mixtus</i>       | 0 | 0 | 1 | 0 | BRA      | 33         |
| <i>Veniliornis nigriceps</i>    | 0 | 1 | 0 | 0 | PER      | 69         |
| <i>Veniliornis passerinus</i>   | 0 | 0 | 1 | 0 | BRA      | 35         |

Ramphastidae

|                                |   |   |   |   |          |          |
|--------------------------------|---|---|---|---|----------|----------|
| <i>Aulacorhynchus prasinus</i> | 0 | 1 | 0 | 0 | NIC, PER | 40       |
| <i>Eubucco versicolor</i>      | 0 | 1 | 0 | 0 | PER      | 40       |
| <i>Pteroglossus aracari</i>    | 0 | 0 | 1 | 0 | BRA      | 19, 99   |
| <i>Ramphastos dicolorus</i>    | 1 | 0 | 1 | 0 | BRA      | 41       |
| <i>Ramphastos toco*</i>        | 0 | 0 | 1 | 0 | BRA      | 19,23,99 |
| <i>Ramphastos tucanus</i>      | 0 | 0 | 1 | 0 | BRA      | 35       |
| <i>Ramphastos vitellinus</i>   | 0 | 0 | 1 | 0 | BRA      | 23, 36   |

Procellariiformes

Procellariidae

|                            |   |   |   |   |     |     |
|----------------------------|---|---|---|---|-----|-----|
| <i>Pachyptila belcheri</i> | 0 | 0 | 1 | 0 | FI  | 80  |
| <i>Puffinus puffinus</i>   | 0 | 0 | 1 | 0 | BRA | 112 |

Psittaciformes

Psittacidae

|                                   |   |   |   |   |               |             |
|-----------------------------------|---|---|---|---|---------------|-------------|
| <i>Amazona aestiva</i>            | 0 | 0 | 1 | 0 | BRA           | 23, 99      |
| <i>Amazona amazonica</i>          | ? | ? | ? | ? | BRA           | 99          |
| <i>Amazona ochrocephala</i>       | 0 | 0 | 1 | 0 | PER           | 49          |
| <i>Amazona vinacea</i>            | ? | ? | ? | ? | BRA           | 99          |
| <i>Anodorhynchus hyacinthinus</i> | 0 | 0 | 1 | 0 | BRA           | 23          |
| <i>Ara ararauna</i>               | ? | ? | ? | ? | BRA           | 99          |
| <i>Ara chloropterus*</i>          | 1 | 0 | 0 | 0 | BRA, PER, SRM | 49, 99, 107 |
| <i>Ara macao</i>                  | 1 | 0 | 0 | 0 | PER           | 49          |

|                                  |   |   |   |   |                      |                            |
|----------------------------------|---|---|---|---|----------------------|----------------------------|
| <i>Aratinga aurea</i>            | ? | ? | ? | ? | BRA                  | 34                         |
| <i>Aratinga jandaya</i>          | 0 | 0 | 1 | 0 | BRA                  | 35                         |
| <i>Aratinga pertinax</i>         | 1 | 0 | 0 | 0 | GY                   | 30                         |
| <i>Brotogeris versicolurus</i>   | 1 | 0 | 1 | 0 | PER                  | 49                         |
| <i>Cyanopsitta spixii</i>        | 0 | 0 | 1 | 0 | BRA                  | 23                         |
| <i>Diopsittaca nobilis</i>       | 0 | 0 | 1 | 0 | GY                   | 30                         |
| <i>Eupisttula aurea</i>          | ? | ? | ? | ? | BRA                  | 99                         |
| <i>Eupisttula pertinax*</i>      | 1 | 0 | 0 | 0 | BRA                  | 28                         |
| <i>Forpus passerinus</i>         | 0 | 0 | 1 | 0 | VEN                  | 91                         |
| <i>Guaruba guarouba</i>          | 0 | 0 | 1 | 0 | BRA                  | 23                         |
| <i>Pionus maximiliani</i>        | ? | ? | ? | ? | BRA                  | 99                         |
| <i>Pionus menstruus*</i>         | 1 | 0 | 1 | 0 | PAN                  | 95                         |
| <i>Primolius maracana</i>        | ? | ? | ? | ? | BRA                  | 99                         |
| <i>Psittacara leucophthalmus</i> | ? | ? | ? | ? | BRA                  | 99                         |
| <i>Psittacara mitratus</i>       | 0 | 0 | 1 | 0 | PER                  | 49                         |
| <i>Pyrrhura lepida</i>           | 0 | 0 | 1 | 0 | BRA                  | 35                         |
| Sphenisciformes                  |   |   |   |   |                      |                            |
| Spheniscidae                     |   |   |   |   |                      |                            |
| <i>Spheniscus humboldti</i>      | 1 | 0 | 0 | 0 | PER                  | 87                         |
| <i>Spheniscus magellanicus</i>   | 1 | 0 | 1 | 0 | ARG, BRA             | 16, 92, 108, 109, 110, 111 |
| <i>Spheniscus mendiculus</i>     | 1 | 0 | 1 | 0 | ECU                  | 57, 58                     |
| Strigiformes                     |   |   |   |   |                      |                            |
| Strigidae                        |   |   |   |   |                      |                            |
| <i>Asio clamator*</i>            | 1 | 0 | 1 | 0 | BRA, COL             | 4,6,75,97, 101             |
| <i>Asio stygius</i>              | 1 | 0 | 1 | 0 | BRA                  | 4,75,99                    |
| <i>Athene cunicularia</i>        | 1 | 0 | 1 | 0 | BRA                  | 4, 6, 75, 99               |
| <i>Bubo virginianus</i>          | 0 | 0 | 1 | 0 | BRA                  | 75                         |
| <i>Glaucidium brasilianum*</i>   | 1 | 0 | 0 | 0 | BRA                  | 6                          |
| <i>Megascops choliba*</i>        | 1 | 0 | 1 | 0 | BRA, COL, PAN,<br>UR | 3, 30, 75, 86, 95, 97, 117 |
| <i>Megascops ingens</i>          | 1 | 0 | 0 | 0 | PER                  | 69                         |
| <i>Pulsatrix koeniswaldiana</i>  | 1 | 0 | 1 | 0 | BRA                  | 6,101                      |
| Tytonidae                        |   |   |   |   |                      |                            |
| <i>Tyto furcata</i>              | 0 | 0 | 1 | 0 | BRA                  | 75                         |
| Struthioniformes                 |   |   |   |   |                      |                            |
| Struthionidae                    |   |   |   |   |                      |                            |
| <i>Struthio camelus</i>          | 0 | 0 | 1 | 0 | BRA                  | 23                         |
| Suliformes                       |   |   |   |   |                      |                            |
| Sulidae                          |   |   |   |   |                      |                            |
| <i>Sula granti</i>               | 1 | 0 | 0 | 0 | ECU                  | 58                         |
| <i>Sula neboxii</i>              | 1 | 0 | 0 | 0 | ECU                  | 58                         |
| Tinamiformes                     |   |   |   |   |                      |                            |
| Tinamidae                        |   |   |   |   |                      |                            |
| <i>Crypturellus obsoletus</i>    | 1 | 0 | 0 | 0 | PER                  | 37,69                      |
| <i>Crypturellus undulatus</i>    | 0 | 0 | 1 | 0 | BRA                  | 38,42                      |

|                               |   |   |   |   |          |                |
|-------------------------------|---|---|---|---|----------|----------------|
| <i>Nothura maculosa major</i> | 0 | 1 | 1 | 0 | PER      | 121            |
| <i>Tinamus major</i> *        | 1 | 0 | 1 | 0 | PER      | 121            |
| Trogoniformes                 |   |   |   |   |          |                |
| Trogonidae                    |   |   |   |   |          |                |
| <i>Trogon personatus</i>      | 0 | 0 | 1 | 0 | COL, PER | 37, 51, 69, 97 |

\*Species reported infected in White et al., [17]

Table S3: Non-passerine species explored and found negative for Haemosporidian parasites in the Neotropic after the comprehensive review of White et al., (1978). Countries abbreviations are as follows: Argentina (ARG), Barbados (BRB), Belize (BZ), Bolivia (BOL), Brazil (BRA), Cayman Islands (CI), Chile (CHL), Colombia (COL), Costa Rica (CR), Dominican Republic (RD), Ecuador (ECU), Falkland Islands (FI), Guatemala (GT), Guyana (GY), Honduras (HON), Jamaica (JAM), Mexico (MEX), Nicaragua (NIC), Panama (PAN), Peru (PER), Suriname (SRM), Uruguay (UR), and Venezuela (VEN). References are numbered as in the Table S4.

| Species                          | Country  | Reference               |
|----------------------------------|----------|-------------------------|
| Accipitriformes                  |          |                         |
| Accipitridae                     |          |                         |
| <i>Accipiter bicolor</i>         | PAN      | 95                      |
| <i>Accipiter striatus</i> *      | BRA, COL | 83, 117                 |
| <i>Accipiter superciliosus</i>   | BRA      | 35,38,40,117            |
| <i>Busarellus nigricollis</i>    | BRA      | 38, 40, 42              |
| <i>Buteo albicaudatus</i>        | BRA      | 4                       |
| <i>Buteo brachyurus</i>          | BRA      | 4                       |
| <i>Buteo magnirostris</i>        | BRA      | 38,40,42                |
| <i>Buteo platypterus</i>         | PAN      | 95                      |
| <i>Geranoaetus albicaudatus</i>  | BRA      | 26                      |
| <i>Harpagus bidentatus</i>       | BRA, PER | 15, 38, 40, 117         |
| <i>Ictinia plumbea</i>           | BRA, PER | 38, 40                  |
| <i>Leucopternis albigollis</i>   | BRA      | 38                      |
| <i>Leucopternis kuhli</i>        | BRA      | 35, 38                  |
| <i>Leucopternis melanops</i>     | BRA      | 35, 38, 40              |
| <i>Parabuteo unicinctus</i>      | BRA      | 19, 86                  |
| <i>Pseudastur albigollis</i>     | PAN      | 95                      |
| <i>Rupornis magnirostris</i>     | BRA, COL | 15, 19, 26, 49, 86, 117 |
| Cathartidae                      |          |                         |
| <i>Coragyps atratus</i> *        | BRA      | 4, 86                   |
| <i>Sarcoramphus papa</i> *       | BRA      | 26                      |
| Anseriformes                     |          |                         |
| Anatidae                         |          |                         |
| <i>Amazonetta brasiliensis</i> * | BRA, COL | 19, 38, 40, 42, 97      |
| <i>Anas andium</i>               | COL      | 51, 61, 62              |
| <i>Anas bahamensis</i>           | PER, ARG | 93                      |
| <i>Anas flavirostris</i>         | ATG, CHL | 8,93                    |

|                                   |          |                       |
|-----------------------------------|----------|-----------------------|
| <i>Anas georgica</i>              | ARG, COL | 52,93                 |
| <i>Anas platyrhynchos</i>         | BRA, COL | 52, 117               |
| <i>Anser anser</i>                | COL      | 52                    |
| <i>Cairina moschata</i>           | COL      | 97                    |
| <i>Chloephaga melanoptera</i>     | PER      | 93                    |
| <i>Dendrocygna autumnalis</i>     | BRA, COL | 38, 40, 42            |
| <i>Dendrocygna bicolor*</i>       | BRA, COL | 22, 52                |
| <i>Dendrocygna viduata</i>        | BRA      | 117                   |
| <i>Lophonetta specularioides</i>  | ARG, PER | 93                    |
| <i>Mareca sibilatrix</i>          | CHL      | 8                     |
| <i>Merganetta armata</i>          | ARG      | 93                    |
| <i>Oressochen jubatus*</i>        | COL      | 97                    |
| <i>Spatula cyanoptera</i>         | ARG      | 93                    |
| <i>Spatula discors</i>            | COL      | 97                    |
| <i>Spatula puna</i>               | PER      | 93                    |
| <i>Spatula versicolor</i>         | ARG      | 93                    |
| Anhimidae                         |          |                       |
| <i>Anhima cornuta*</i>            | BRA      | 35, 38, 40            |
| Apodiformes                       |          |                       |
| Apodidae                          |          |                       |
| <i>Chaetura cinereiventris*</i>   | BRA      | 15, 117               |
| <i>Leucippus fallax</i>           | BRA      | 28                    |
| <i>Streptoprocne rutila</i>       | PER      | 40                    |
| <i>Tachornis phoenicobia</i>      | JAM      | 10                    |
| <i>Tachornis squamata*</i>        | BRA      | 35, 38                |
| Trochilidae                       |          |                       |
| <i>Adelomyia melanogenys</i>      | COL, PER | 29,38,40              |
| <i>Aglaeactis cupripennis</i>     | COL      | 29, 51, 62            |
| <i>Aglaiocercus kingii*</i>       | COL, PER | 38, 40                |
| <i>Amazilia amazilia</i>          | PER      | 49                    |
| <i>Amazilia beryllina</i>         | MEX      | 40, 53                |
| <i>Amazilia cyanocephala</i>      | NIC      | 40                    |
| <i>Amazilia fimbriata</i>         | COL, BRA | 5, 38, 40, 42, 84, 97 |
| <i>Amazilia franciae*</i>         | COL      | 62                    |
| <i>Amazilia rutila</i>            | CR, NIC  | 40, 104               |
| <i>Amazilia sp</i>                | COL      | 51, 61, 62            |
| <i>Amazilia tzacatl*</i>          | NIC      | 40                    |
| <i>Amazilia versicolor</i>        | BRA, COL | 35, 38, 40, 84        |
| <i>Anthracothonax dominicus</i>   | RD       | 56                    |
| <i>Anthracothonax mango</i>       | JAM      | 10                    |
| <i>Anthracothonax nigricollis</i> | BRA, PER | 49, 117               |
| <i>Aphantochroa cirrochloris</i>  | BRA      | 5                     |
| <i>Avocettula recurvirostris</i>  | BRA      | 35, 38, 40            |
| <i>Boissonneaua flavescens</i>    | COL      | 97                    |

---

|                                   |                    |                             |
|-----------------------------------|--------------------|-----------------------------|
| <i>Boissonneaua matthewsii</i>    | PER                | 38, 40                      |
| <i>Calliphlox amethystina</i>     | BRA                | 35, 38, 40                  |
| <i>Campylopterus hemileucurus</i> | NIC, PAN           | 40, 95                      |
| <i>Campylopterus largipennis</i>  | BRA, ECU, PER      |                             |
| <i>Chaetocercus mulsant</i>       | COL                | 51, 61, 62                  |
| <i>Chalcostigma herrani</i>       | COL                | 51, 61, 62                  |
| <i>Chalcostigma heteropogon</i>   | COL                | 29, 51, 61, 62              |
| <i>Chalybura buffonii</i>         | COL                | 7                           |
| <i>Chalybura urochrysa</i>        | NIC, PAN           | 40, 95                      |
| <i>Chionomesa fimbriata</i>       | COL                | 97                          |
| <i>Chlorestes notata</i>          | BRA, COL, PER      | 38, 49, 97                  |
| <i>Chlorostilbon assimilis</i>    | PAN                | 95                          |
| <i>Chlorostilbon aureoventris</i> | BRA                | 34                          |
| <i>Chlorostilbon mellisugus</i>   | BRA, COL           | 38, 51, 61, 62              |
| <i>Chrysuronia oenone</i>         | PER                | 38, 40                      |
| <i>Coeligena bonapartei</i>       | COL                | 51, 61, 62                  |
| <i>Coeligena helianthea*</i>      | COL                | 97                          |
| <i>Coeligena lutetiae</i>         | COL                | 51, 61, 62                  |
| <i>Coeligena torquata</i>         | COL, PER           | 29, 38, 40, 51, 61, 62      |
| <i>Coeligena coeligena</i>        | COL, PER           | 29, 38, 40, 61, 62          |
| <i>Colibri coruscans</i>          | COL                | 51, 61, 62                  |
| <i>Colibri serrirostris</i>       | BRA                | 34, 38                      |
| <i>Colibri thalassinus</i>        | COL, MEX, PAN, PER | 38, 40, 62, 97              |
| <i>Coeligena violifer</i>         | PER                | 38, 40                      |
| <i>Clytolaema rubricauda*</i>     | BRA                | 15, 117                     |
| <i>Discosura conversii</i>        | COL                | 51, 61, 62                  |
| <i>Doryfera johannae</i>          | PER                | 38, 40                      |
| <i>Doryfera ludovicae</i>         | COL, PER           | 38, 40, 62                  |
| <i>Elvira chionura</i>            | PAN                | 95                          |
| <i>Ensifera ensifera</i>          | COL                | 97                          |
| <i>Eriocnemis cupreiventris</i>   | COL                | 97                          |
| <i>Eriocnemis derbyi</i>          | COL                | 97                          |
| <i>Eriocnemis mosquera</i>        | COL                | 51, 61, 62                  |
| <i>Eriocnemis vestita</i>         | COL                | 97                          |
| <i>Eugenes fulgens</i>            | MEX, NIC           | 40                          |
| <i>Eutoxeres aquila</i>           | ECU, PAN           | 73, 95                      |
| <i>Eutoxeres condamini</i>        | ECU, PER           | 38, 40, 73                  |
| <i>Eupetomena macroura</i>        | BRA                | 34, 38, 42                  |
| <i>Florisuga fusca</i>            | BRA                | 38, 40                      |
| <i>Florisuga mellivora</i>        | BRA, PER, PAN      | 35, 38, 40, 49, 95          |
| <i>Glaucis sp</i>                 | COL                | 97                          |
| <i>Glaucis hirsutus*</i>          | BOL, BRA, COL      | 13, 35, 38, 40, 84, 97, 117 |
| <i>Haplophaedia aureliae</i>      | COL, PER           | 38, 40, 51, 61, 62          |
| <i>Heliactin bilophus</i>         | BRA                |                             |

---



---

|                                   |               |                         |
|-----------------------------------|---------------|-------------------------|
| <i>Helianthus amethysticollis</i> | COL, PER      | 38, 40, 97              |
| <i>Helianthus exortis</i>         | COL           | 97                      |
| <i>Heliodoxa jacula*</i>          | PAN           | 95                      |
| <i>Heliodoxa leadbeateri</i>      | PER, COL      | 38, 40                  |
| <i>Heliodoxa rubinoides</i>       | PER, COL      | 38, 40, 51, 62          |
| <i>Heliomaster constantii</i>     | MEX           | 53                      |
| <i>Heliomaster longirostris</i>   | BRA, COL      | 35, 38, 40, 51, 95      |
| <i>Heliothryx auritus</i>         | COL           | 97                      |
| <i>Heliothryx barroti</i>         | COL, PAN      | 60, 95                  |
| <i>Hylocharis chrysura*</i>       | BRA           | 38, 40, 42              |
| <i>Hylocharis cyanus</i>          | BOL, BRA      | 13, 35, 38, 40          |
| <i>Hylocharis eliciae*</i>        | NIC           | 40                      |
| <i>Hylocharis leucotis</i>        | NIC, MEX      | 40                      |
| <i>Klais guimeti</i>              | NIC, PER      | 38, 40                  |
| <i>Lafresnaya lafresnayi</i>      | COL, PER      | 38, 40, 97              |
| <i>Lampornis castaneiventris</i>  | PAN           | 95                      |
| <i>Lampornis clemenciae</i>       | MEX           | 40, 53                  |
| <i>Lampornis sybillae</i>         | NIC           | 40                      |
| <i>Lesbia victoriae</i>           | COL           | 29                      |
| <i>Leucochloris albicollis</i>    | BRA           | 5, 38                   |
| <i>Metallura tyrianthina*</i>     | COL, PER      | 38, 40, 61, 61, 62      |
| <i>Metallura williami</i>         | COL           | 51, 61, 62              |
| <i>Ocreatus underwoodii</i>       | COL, PER      | 38, 40, 51, 61, 62, 103 |
| <i>Opisthoprora euryptera</i>     | COL, PER      | 38, 40, 97              |
| <i>Oxypogon guerinii</i>          | COL           | 51, 61, 62              |
| <i>Phaethornis anthophilus</i>    | COL           | 60, 97                  |
| <i>Phaethornis atrimentalis</i>   | PER           | 49                      |
| <i>Phaethornis augusti</i>        | COL           | 51, 61, 62              |
| <i>Phaethornis bourcierii</i>     | BRA, COL      | 35, 38, 97              |
| <i>Phaethornis eurynome</i>       | BRA           | 5, 38, 40, 117          |
| <i>Phaethornis griseogularis</i>  | PER           | 49                      |
| <i>Phaethornis guy</i>            | COL, PER      | 38, 40, 62              |
| <i>Phaethornis hispidus</i>       | COL, COL, PER | 13, 49, 84              |
| <i>Phaethornis longirostris</i>   | COL, NIC      | 40, 60                  |
| <i>Phaethornis longuemareus*</i>  | PAN           | 95                      |
| <i>Phaethornis nattereri</i>      | BOL           | 13                      |
| <i>Phaethornis ruber</i>          | BOL, BRA, PER | 13, 35, 38, 40          |
| <i>Phaethornis striigularis</i>   | NIC           | 40                      |
| <i>Phaethornis subochraceus</i>   | BRA           | 38                      |
| <i>Phaethornis superciliosus*</i> | BRA, PER, PAN | 35, 38, 40, 49, 95      |
| <i>Phaethornis syrmatophorus*</i> | COL, PER      | 38, 40, 51, 61, 62      |
| <i>Polytmus guainumbi</i>         | COL           | 84                      |
| <i>Polytmus theresiae</i>         | BRA           | 35, 38, 40              |

---

|                                   |                         |                                    |
|-----------------------------------|-------------------------|------------------------------------|
| <i>Pterophanes</i>                | COL                     | 97                                 |
| <i>Pterophanes cyanopterus</i>    | COL                     | 51, 61, 62                         |
| <i>Ramphodon naevius</i>          | BRA                     | 5, 38, 40, 117                     |
| <i>Ramphomicron microrhynchum</i> | COL                     | 29, 51, 61, 62                     |
| <i>Schistes geoffroyi</i>         | COL, PER                | 38, 40, 62                         |
| <i>Stephanoxis lalandi</i>        | BRA                     | 38                                 |
| <i>Taphrospilus hypostictus</i>   | PER                     | 38, 40                             |
| <i>Thalurania colombica</i>       | NIC                     | 40                                 |
| <i>Thalurania furcata*</i>        | BOL, BRA, COL, ECU, PER | 13, 38, 40, 49, 73, 97             |
| <i>Thalurania glaucopsis</i>      | BRA                     | 5, 38, 40                          |
| <i>Threnetes leucurus</i>         | BRA, COL, PER           | 35, 38, 40, 97                     |
| <i>Threnetes niger</i>            | ECU                     | 73                                 |
| <i>Threnetes ruckeri</i>          | COL, PAN                | 51, 61, 62, 92                     |
| <i>Topaza pella</i>               | BRA                     | 38                                 |
| <i>Uranomitra franciae</i>        | COL                     | 29                                 |
| Caprimulgiformes                  |                         |                                    |
| Caprimulgidae                     |                         |                                    |
| <i>Antrostomus sericocaudatus</i> | BRA                     | 35, 38, 40                         |
| <i>Chordeiles acutipennis*</i>    | BRA, COL                | 42, 97                             |
| <i>Chordeiles minor</i>           | JAM                     | 10                                 |
| <i>Chordeiles sp</i>              | COL                     | 97                                 |
| <i>Eleothreptus anomalus</i>      | BRA                     | 117                                |
| <i>Hydropsalis brasiliانا*</i>    | BOL, BRA                | 13, 15                             |
| <i>Hydropsalis forcipata</i>      | BRA                     | 5                                  |
| <i>Hydropsalis maculicaudus</i>   | BRA, PER                | 38, 40, 49                         |
| <i>Hydropsalis torquata</i>       | BRA                     | 34, 38, 117                        |
| <i>Lurocalis semitorquatus*</i>   | BRA                     | 15, 117                            |
| <i>Nyctidromus albicollis*</i>    | BOL, BRA, COL           | 3, 13, 15, 28, 35, 38, 40, 42, 117 |
| <i>Nyctiphrynus ocellatus*</i>    | BRA                     | 13, 15, 117                        |
| <i>Nyctiprogne leucopyga</i>      | BRA                     | 35, 38                             |
| <i>Setopagis parvula</i>          | BRA                     | 34, 38                             |
| <i>Systellura longirostris</i>    | COL                     | 62                                 |
| Nyctibiidae                       |                         |                                    |
| <i>Nyctibius aethereus</i>        | BRA                     | 35, 38, 40                         |
| <i>Nyctibius bracteatus</i>       | BRA                     | 35, 38                             |
| Cariamiformes                     |                         |                                    |
| Cariamidae                        |                         |                                    |
| <i>Cariama cristata</i>           | BRA                     | 42                                 |
| Charadriiformes                   |                         |                                    |
| Burhinidae                        |                         |                                    |
| <i>Burhinus bistriatus</i>        | COL                     | 3, 97                              |
| Charadriidae                      |                         |                                    |
| <i>Charadrius semipalmatus</i>    | COL                     | 97                                 |
| <i>Charadrius wilsonia</i>        | JAM                     | 10                                 |

|                                |                    |                                |
|--------------------------------|--------------------|--------------------------------|
| <i>Pluvialis squatarola</i> *  | COL                | 97                             |
| <i>Vanellus cayanus</i>        | COL                | 97                             |
| <i>Vanellus chilensis</i> *    | BRA, COL           | 3, 42, 51, 61, 62, 117         |
| <i>Vanellus resplendens</i>    |                    |                                |
| Jacaniidae                     |                    |                                |
| <i>Jacana jacana</i>           | BRA, COL           | 35, 38, 40, 97                 |
| Laridae                        |                    |                                |
| <i>Gelochelidon nilotica</i>   | COL                | 51, 61, 62                     |
| <i>Leucophaeus atricilla</i>   | COL                | 51, 61, 62                     |
| <i>Sterna hirundo</i>          | COL                | 97                             |
| <i>Thalasseus sandvicensis</i> | COL                | 51, 61, 62                     |
| Recurvirostridae               |                    |                                |
| <i>Himantopus mexicanus</i>    | COL                | 51, 61, 62                     |
| Scolopacidae                   |                    |                                |
| <i>Actitis macularius</i> *    | COL                | 97                             |
| <i>Calidris alba</i>           | JAM                | 10                             |
| <i>Calidris himantopus</i> *   | JAM                | 10                             |
| <i>Calidris mauri</i>          | COL, JAM           | 10, 97                         |
| <i>Calidris melanotos</i> *    | COL                | 97                             |
| <i>Calidris minutilla</i> *    | COL, JAM           | 10, 97                         |
| <i>Calidris pusilla</i> *      | COL, JAM           | 10, 97                         |
| <i>Gallinago delicata</i> *    | COL                | 97                             |
| <i>Gallinago nobilis</i> *     | COL                | 51                             |
| <i>Limnodromus griseus</i> *   | COL                | 51, 61, 62                     |
| <i>Numenius phaeopus</i> *     | COL                | 97                             |
| <i>Tringa flaviceps</i>        | BRA                | 117                            |
| <i>Tringa flavipes</i> *       | COL                | 97                             |
| <i>Tringa melanoleuca</i>      | COL                | 97                             |
| <i>Tringa solitaria</i>        | COL                | 97                             |
| Ciconiiformes                  |                    |                                |
| Ciconiidae                     |                    |                                |
| <i>Jabiru mycteria</i> *       | BRA                | 38, 40, 42                     |
| Columbiformes                  |                    |                                |
| Columbidae                     |                    |                                |
| <i>Claravis pretiosa</i>       | BRA, COL, NIC, PER | 3, 7, 38, 40, 42, 49, 103, 117 |
| <i>Columba livia</i>           | COL                | 60                             |
| <i>Columba plumbea</i>         | PAN                | 117                            |
| <i>Columba speciosa</i>        | BRA                | 13                             |
| <i>Columba subvinacea</i>      | COL                | 13                             |
| <i>Columbina buckleyi</i>      | COL                | 49                             |
| <i>Columbina minuta</i>        | BRA                | 38, 42, 95, 97                 |
| <i>Columbina picui</i>         | COL                | 38, 40, 42, 49                 |
| <i>Columbina passerina</i>     | RD                 | 38, 40, 96, 97                 |
| <i>Columbina squammata</i>     | PER                | 3, 38, 42, 97                  |

|                                   |                              |                                             |
|-----------------------------------|------------------------------|---------------------------------------------|
| <i>Columbina talpacoti</i>        | ARG, BRA, COL                | 3, 28, 38, 40, 42                           |
| <i>Geotrygon chiriquensis</i>     | PAN                          | 95                                          |
| <i>Geotrygon frenata</i>          | PER                          | 40                                          |
| <i>Geotrygon montana</i>          | BOL, BRA, COL, CR, JAM, NIC  | 5, 10, 13, 38, 40, 97, 120                  |
| <i>Geotrygon violacea</i>         | BOL, BRA                     | 13, 35, 38                                  |
| <i>Leptotila cassini</i>          | NIC, PAN                     | 40, 95                                      |
| <i>Leptotila jamaicensis</i>      | JAM                          | 10                                          |
| <i>Leptotila rufaxilla*</i>       | BRA, COL                     | 15, 28, 38, 40, 49, 117                     |
| <i>Leptotila verreauxi*</i>       | BRA, COL                     | 15, 38, 40, 42, 60, 117                     |
| <i>Metriopelia aymara</i>         | CHL                          | 40                                          |
| <i>Metriopelia ceciliae*</i>      | CHL                          | 40                                          |
| <i>Metriopelia melanoptera*</i>   | CHL                          | 40                                          |
| <i>Patagioenas cayannensis</i>    | PER                          | 49, 97                                      |
| <i>Patagioenas fasciata</i>       | PER                          | 38, 40                                      |
| <i>Patagioenas maculosa</i>       | ARG, BRA                     | 38, 40                                      |
| <i>Patagioenas nigristrostris</i> | PAN                          | 95                                          |
| <i>Patagioenas plumbea</i>        | BRA, PER                     | 35, 38, 40                                  |
| <i>Patagioenas subvinacea</i>     | PER                          | 38, 40, 49                                  |
| <i>Uropelia campestris</i>        | BRA                          | 42                                          |
| <i>Zenaida auriculata</i>         | ARG, BRA, CHL                | 38, 40                                      |
| <i>Zenaida aurita</i>             | BRB                          | 96                                          |
| Coraciiformes                     |                              |                                             |
| Alcedinidae                       |                              |                                             |
| <i>Chloroceryle aenea*</i>        | BOL, BRA, COL, CR, NIC       | 3, 13, 15, 28, 38, 40, 42, 49, 97, 117, 120 |
| <i>Chloroceryle amazona</i>       | BRA, COL, PAN                | 38, 40, 42, 84, 95, 117                     |
| <i>Chloroceryle americana</i>     | BOL, BRA, COL, CR, NIC, PAN  | 3, 13, 15, 35, 38, 40, 42, 84, 95, 120      |
| <i>Chloroceryle inda*</i>         | COL, BRA                     | 3, 13, 15, 38, 40, 42, 49, 84, 117          |
| <i>Chloroceryle torquata</i>      | BRA                          | 117                                         |
| <i>Megaceryle torquata*</i>       | BRA, COL, PAN                | 38, 40, 42, 84, 95                          |
| Momotidae                         |                              |                                             |
| <i>Baryphthengus martii</i>       | BRA, PER                     | 35, 38, 40, 49                              |
| <i>Electron platyrhynchum</i>     | PER                          | 49                                          |
| <i>Momotus lessonii</i>           | HON, NIC                     | 40                                          |
| <i>Momotus momota</i>             | BOL, BRA, COL, NIC, PAN, PER | 13, 35, 38, 40, 51, 60, 61, 62, 95, 103     |
| Todidae                           |                              |                                             |
| <i>Todus angustirostris</i>       | RD                           | 56                                          |
| <i>Todus todus</i>                | JAM                          | 10                                          |
| Cuculiformes                      |                              |                                             |
| Cuculidae                         |                              |                                             |
| <i>Coccyzua cinerea</i>           | ARG, BRA                     | 38, 42                                      |
| <i>Coccyzua minuta</i>            | COL                          | 97                                          |
| <i>Coccyzus americanus*</i>       | COL                          | 51, 61, 62                                  |
| <i>Coccyzus euleri</i>            | BRA                          | 117                                         |

|                                   |                    |                                                     |
|-----------------------------------|--------------------|-----------------------------------------------------|
| <i>Coccyzus melacoryphus*</i>     | ARG, BRA, COL, PER | 38, 40, 97, 117                                     |
| <i>Coccyzus minor</i>             | JAM, RD, PAN       | 10, 56, 95                                          |
| <i>Crotophaga ani</i>             | BRA, COL, JAM, PAN | 10, 15, 28, 38, 40, 42, 49, 51, 60, 61, 62, 95, 117 |
| <i>Crotophaga major</i>           | COL, PER           | 49, 97                                              |
| <i>Crotophaga sulcirostris</i>    | COL                | 3                                                   |
| <i>Dromococcyx pavoninus*</i>     | BRA                | 15, 117                                             |
| <i>Guira guira*</i>               | BRA                | 117                                                 |
| <i>Piaya cayana</i>               | BRA, CR, PAN, PER  | 15, 38, 40, 95, 104, 117                            |
| <i>Tapera naevia*</i>             | BRA, PAN           | 15, 35, 38, 40, 95, 117                             |
| Eurypygiiformes                   |                    |                                                     |
| Eurypygidae                       |                    |                                                     |
| <i>Eurypyga helias*</i>           | PAN, PER           | 49, 95                                              |
| Falconiformes                     |                    |                                                     |
| Falconidae                        |                    |                                                     |
| <i>Caracara plancus</i>           | BRA                | 4, 19, 22, 26, 86                                   |
| <i>Falco femoralis</i>            | ARG, BRA           | 4, 26, 38                                           |
| <i>Falco peregrinus*</i>          | BRA                | 86                                                  |
| <i>Falco ruficularis*</i>         | BRA                | 4                                                   |
| <i>Falco sparverius</i>           | BRA, COL, JAM      | 4, 10, 19, 26, 42, 86, 97, 99                       |
| <i>Herpetotheres cachinnans*</i>  | PAN                | 95                                                  |
| <i>Heterospizias meridionalis</i> | BRA                | 4, 19, 26                                           |
| <i>Leptodon cayanensis</i>        | BRA                | 4                                                   |
| <i>Micrastur gillvicollis</i>     | BOL, BRA, ECU      | 13, 38, 73                                          |
| <i>Micrastur mintoni</i>          | BRA                | 40                                                  |
| <i>Micrastur ruficollis</i>       | BRA                | 15, 35, 38, 40                                      |
| <i>Micrastur semitorquatus</i>    | BRA                | 40                                                  |
| <i>Milvago chimachima</i>         | BRA                | 4, 26, 86                                           |
| Galbuliformes                     |                    |                                                     |
| Bucconidae                        |                    |                                                     |
| <i>Bucco capensis</i>             | BRA, PER           | 35, 38, 40                                          |
| <i>Bucco macrodactylus</i>        | COL                | 97                                                  |
| <i>Bucco tamatia</i>              | BRA, COL           | 35, 38, 97                                          |
| <i>Chelidoptera tenebrosa</i>     | BOL                | 13                                                  |
| <i>Hypnelus ruficollis</i>        | COL                | 3                                                   |
| <i>Jacamerops aureus*</i>         | BRA                | 35, 38, 40                                          |
| <i>Malacoptila fulvogularis</i>   | PER                | 38, 40                                              |
| <i>Malacoptila fusca</i>          | BRA, PER           | 35, 38, 40                                          |
| <i>Malacoptila panamensis*</i>    | NIC, PAN           | 40, 95                                              |
| <i>Malacoptila rufa</i>           | BRA                | 38, 40                                              |
| <i>Malacoptila striata*</i>       | BRA                | 5, 15, 117                                          |
| <i>Micromonacha lanceolata</i>    | PER                | 38, 40                                              |
| <i>Monasa morphoeus*</i>          | BOL, BRA, PAN      | 13, 35, 38, 40, 95                                  |
| <i>Monasa nigrifrons</i>          | BOL, BRA, COL      | 13, 38, 40, 97                                      |

---

|                                 |                   |                                     |
|---------------------------------|-------------------|-------------------------------------|
| <i>Nonnula brunnea</i>          | ECU               | 73                                  |
| <i>Nonnula frontalis</i>        | PAN               | 95                                  |
| <i>Nonnula ruficapilla</i>      | BOL               | 13                                  |
| <i>Notharchus macrorhynchos</i> | BOL, BRA          | 13, 117                             |
| <i>Notharchus tectus*</i>       | BOL, BRA, PER     | 13, 35, 40, 49                      |
| <i>Nystalus chacuru</i>         | BRA               | 15, 19, 28, 38                      |
| <i>Nystalus maculatus</i>       | BRA               | 28, 38, 40                          |
| Galbulidae                      |                   |                                     |
| <i>Brachygalba lugubris</i>     | BRA               | 35, 38, 40                          |
| <i>Galbula albirostris</i>      | BRA               | 38                                  |
| <i>Galbula cyanicollis</i>      | BRA               | 38, 40                              |
| <i>Galbula cyanescens</i>       | PER               | 38, 40, 49                          |
| <i>Galbula ruficauda</i>        | BOL, BRA, COL, CR | 13, 34, 35, 38, 40, 42, 60, 97, 104 |
| <i>Galbula tombacea*</i>        | COL               | 97                                  |
| Galliformes                     |                   |                                     |
| Cracidae                        |                   |                                     |
| <i>Ortalis canicollis</i>       | BRA               | 42                                  |
| <i>Penelope montagnii*</i>      | COL               | 97                                  |
| <i>Ortalis cinereiceps</i>      | PAN               | 95                                  |
| <i>Penelope obscura</i>         | BRA               | 19                                  |
| <i>Penelope ochrogaster</i>     | BRA               | 42                                  |
| <i>Penelope superciliaris</i>   | BRA               | 35, 38, 40                          |
| Meleagridae                     |                   |                                     |
| <i>Meleagris gallopavo</i>      | COL               | 60                                  |
| Numididae                       |                   |                                     |
| <i>Numida meleagris</i>         | COL               | 60                                  |
| Odontophoridae                  |                   |                                     |
| <i>Callipepla californica</i>   | ARG, CHL          | 38, 40                              |
| <i>Colinus cristatus*</i>       | COL               | 84                                  |
| <i>Colinus virginianus*</i>     | RD                | 56                                  |
| <i>Odontophorus speciosus</i>   | PER               | 38, 40                              |
| Phasianidae                     |                   |                                     |
| <i>Coturnix coturnix</i>        | COL               | 97                                  |
| <i>Gallus gallus</i>            | COL, BRA          | 51, 117                             |
| Gruiformes                      |                   |                                     |
| Psophiidae                      |                   |                                     |
| <i>Psophia crepitans</i>        | BRA               | 38                                  |
| <i>Psophia ochroptera</i>       | BRA               | 35                                  |
| <i>Psophia viridis</i>          | BRA               | 38                                  |
| Rallidae                        |                   |                                     |
| <i>Anurolimnas viridis</i>      | BRA               | 38, 40                              |
| <i>Aramides cajanea</i>         | BRA               | 15, 35, 38, 40, 42, 117             |
| <i>Fulica ardesiaca</i>         | COL               | 51, 61, 62                          |
| <i>Gallinula galeata</i>        | COL               | 97                                  |

---

|                                   |               |                             |
|-----------------------------------|---------------|-----------------------------|
| <i>Laterallus albigularis*</i>    | PAN           | 95                          |
| <i>Laterallus melanophaius*</i>   | BRA           | 15, 117                     |
| <i>Laterallus viridis</i>         | BRA           | 117                         |
| <i>Micropygia schomburgkii*</i>   | BRA           | 15, 117                     |
| <i>Rufirallus viridis</i>         | BRA           | 35                          |
| <i>Porphyrio martinica</i>        | COL, PAN, PER | 49, 95, 97                  |
| Pelecaniformes                    |               |                             |
| Ardeidae                          |               |                             |
| <i>Ardea alba</i>                 | BRA           | 40                          |
| <i>Ardea cocoi</i>                | BRA           | 40, 117                     |
| <i>Bubulcus ibis*</i>             | COL           | 97                          |
| <i>Butorides striata*</i>         | BRA, COL, VEN | 15, 38, 40, 42, 46, 97, 117 |
| <i>Butorides virescens</i>        | VEN           | 46                          |
| <i>Cochlearius cochlearius*</i>   | BRA           | 38, 40, 42                  |
| <i>Egretta caerulea*</i>          | BRA, PAN, VEN | 38, 40, 42, 46, 95          |
| <i>Egretta rufescens</i>          | COL           | 51, 61, 62                  |
| <i>Egretta thula</i>              | BRA, COL      | 22, 38, 40, 42, 97          |
| <i>Egretta tricolor*</i>          | COL           | 97                          |
| <i>Nycticorax nycticorax*</i>     | COL           | 97                          |
| <i>Nyctanassa violacea*</i>       | COL           | 97                          |
| <i>Syrigma sibilatrix*</i>        | BRA           | 38, 40, 42                  |
| <i>Tigrisoma lineatum</i>         | BRA           | 38, 40, 42                  |
| Phalacrocoracidae                 |               |                             |
| <i>Phalacrocorax brasilianus*</i> | BRA, COL      | 22, 38, 40, 42, 97          |
| <i>Phimosus infuscatus</i>        | BRA, COL      | 38, 40, 42, 51, 61, 62      |
| <i>Platalea ajaja*</i>            | BRA, COL      | 38, 42, 97                  |
| <i>Plegadis falcinellus</i>       | COL           | 97                          |
| Threskiornithidae                 |               |                             |
| <i>Mesembrinibis cayennensis</i>  | BRA           | 38, 40                      |
| <i>Theristicus caerulescens</i>   | BRA           | 42                          |
| <i>Theristicus caudatus*</i>      | BRA           | 38, 40, 42                  |
| Phoenicopteriformes               |               |                             |
| Podicipedidae                     |               |                             |
| <i>Podilymbus podiceps</i>        | COL           | 97                          |
| Piciformes                        |               |                             |
| Capitonidae                       |               |                             |
| <i>Capito auratus</i>             | PER           | 49                          |
| Picidae                           |               |                             |
| <i>Campephilus melanoleucos*</i>  | PAN, PER      | 38, 40, 95                  |
| <i>Campephilus rubicollis</i>     | BRA           | 38, 40                      |
| <i>Celeus castaneus*</i>          | HON           | 40                          |
| <i>Celeus elegans</i>             | BRA           | 35, 38, 40                  |
| <i>Celeus grammicus</i>           | BRA           | 35, 38                      |

---

|                                   |               |                         |
|-----------------------------------|---------------|-------------------------|
| <i>Celeus undatus</i>             | BRA           | 35, 38, 40              |
| <i>Chrysoptilus melanochlorus</i> | BRA           | 15, 117                 |
| <i>Colaptes auratus</i>           | NIC           | 40                      |
| <i>Colaptes campestris</i>        | BRA           | 15, 34, 38, 40, 42, 117 |
| <i>Colaptes melanochlorus</i>     | ARG, BRA      | 28, 38                  |
| <i>Colaptes pitius</i>            | ARG, CHL      | 38, 40                  |
| <i>Colaptes punctigula</i> *      | COL           | 3, 49, 60, 97           |
| <i>Colaptes rivolii</i> *         | COL, PER      | 38, 40, 51, 61, 62      |
| <i>Colaptes rubiginosus</i> *     | NIC, PER      | 38, 40                  |
| <i>Dryobates passerinus</i>       | COL           | 3                       |
| <i>Dryocopus lineatus</i>         | COL, NIC, PER | 38, 40, 60              |
| <i>Melanerpes candidus</i> *      | BRA           | 28                      |
| <i>Melanerpes cruentatus</i> *    | BOL, BRA, COL | 13, 35, 28, 97          |
| <i>Melanerpes chrysogenys</i>     | MEX           | 53                      |
| <i>Melanerpes formicivorus</i> *  | NIC, PAN      | 40, 95                  |
| <i>Melanerpes hypopolius</i> *    | MEX           | 53                      |
| <i>Melanerpes pucherani</i>       | PAN           | 95                      |
| <i>Melanerpes radiolatus</i>      | JAM           | 10                      |
| <i>Melanerpes rubricapillus</i> * | BRA, COL, VEN | 3, 9, 28, 98            |
| <i>Melanerpes striatus</i>        | RD            | 56                      |
| <i>Nesocittes micromegas</i>      | RD            | 56                      |
| <i>Piculus aurulentus</i>         | BRA           | 15                      |
| <i>Piculus chrysochlorus</i>      | BOL           | 13                      |
| <i>Piculus flavigula</i>          | BOL, BRA      | 13, 38, 40              |
| <i>Piculus rubiginosus</i>        | NIC           | 40                      |
| <i>Picoides fumigatus</i>         | PER           | 38, 40                  |
| <i>Picumnus albosquamatus</i>     | BRA           | 42                      |
| <i>Picumnus aurifrons</i>         | BOL           | 13                      |
| <i>Picumnus cirratus</i>          | ARG, BRA      | 38, 40, 42, 117         |
| <i>Picumnus castelnau</i>         | PER           | 49                      |
| <i>Picumnus fulvescens</i>        | BRA           | 38                      |
| <i>Picumnus lafresnayi</i>        | PER           | 38, 40                  |
| <i>Picumnus nebulosus</i>         | BRA           | 38                      |
| <i>Picumnus olivaceus</i>         | COL, PAN      | 62, 95                  |
| <i>Picumnus pygmaeus</i>          | BRA           | 35, 38, 40              |
| <i>Picumnus rufiventris</i>       | ECU           | 73                      |
| <i>Picumnus squamulatus</i> *     | COL           | 3                       |
| <i>Picumnus steindachneri</i>     | PER           | 38, 40                  |
| <i>Picumnus temminckii</i> *      | BRA           | 5, 15, 38, 40, 117      |
| <i>Sphyrapicus varius</i>         | JAM           | 10                      |
| <i>Veniliornis affinis</i>        | BOL, BRA      | 13, 38, 40              |
| <i>Veniliornis mixtus</i>         | ARG, BRA      | 34, 38, 40              |
| <i>Veniliornis nigriceps</i>      | PER           | 38, 40                  |
| <i>Veniliornis passerinus</i>     | BRA           | 38, 40, 42              |

---



|                                     |                   |                     |
|-------------------------------------|-------------------|---------------------|
| <i>Veniliornis spilogaster*</i>     | BRA               | 5, 15, 38, 117      |
| Ramphastidae                        |                   |                     |
| <i>Andigena hypoglauca</i>          | COL               | 51, 61, 62          |
| <i>Andigena nigrirostris</i>        | COL               | 51, 61, 62          |
| <i>Aulacorhynchus albivitta</i>     | COL               | 97                  |
| <i>Aulacorhynchus haematopygus*</i> | COL               | 62                  |
| <i>Aulacorhynchus prasinus</i>      | COL, CR, PAN, PER | 38, 40, 62, 95, 119 |
| <i>Capito aurovirens</i>            | COL               | 97                  |
| <i>Eubucco versicolor</i>           | PER               | 38, 40              |
| <i>Pteroglossus aracari</i>         | BRA               | 35, 38, 40          |
| <i>Pteroglossus azara</i>           | PER               | 28, 40              |
| <i>Pteroglossus beauharnaesii</i>   | PER               | 49                  |
| <i>Pteroglossus bitorquatus</i>     | BOL, BRA          | 13, 38              |
| <i>Pteroglossus castanotis</i>      | BOL, BRA, COL     | 13, 42, 97          |
| <i>Pteroglossus inscriptus</i>      | BOL, BRA, PER     |                     |
| <i>Pteroglossus pluricinctus</i>    | COL               | 97                  |
| <i>Pteroglossus torquatus</i>       | COL, PAN          | 60, 95              |
| <i>Pteroglossus viridis*</i>        | BRA               | 35, 38              |
| <i>Ramphastos ambiguus</i>          | PER               | 38, 40              |
| <i>Ramphastos dicolorus*</i>        | BRA               | 19, 22, 38          |
| <i>Ramphastos sulfuratus</i>        | PAN               | 95                  |
| <i>Ramphastos toco</i>              | BRA               | 26                  |
| <i>Ramphastos tucanus*</i>          | BRA, PER          | 38, 49              |
| <i>Ramphastos vitellinus*</i>       | BOL, BRA, PER     | 13, 35, 38, 40, 117 |
| <i>Ramphocaenus melanurus</i>       | PER               | 49                  |
| <i>Selenidera gouldii</i>           | BRA               | 35, 38, 40          |
| <i>Selenidera maculirostris</i>     | BOL, BRA          | 13, 38, 40, 117     |
| <i>Selenidera piperivora</i>        | BRA               | 38                  |
| <i>Selenidera reinwardtii</i>       | PER               | 38, 40, 49          |
| Psittaciformes                      |                   |                     |
| Psittacidae                         |                   |                     |
| <i>Amazona aestiva*</i>             | BRA               | 19, 26              |
| <i>Amazona amazonica*</i>           | COL, PER          | 49, 97              |
| <i>Amazona barbadensis*</i>         | BRA               | 28                  |
| <i>Amazona farinosa</i>             | PER               | 49                  |
| <i>Amazona festiva</i>              | PER               | 49                  |
| <i>Amazona mercenaria</i>           | PER               | 97                  |
| <i>Amazona ochrocephala*</i>        | COL               | 19, 26, 49          |
| <i>Ara ararauna</i>                 | BRA, PER          | 38                  |
| <i>Ara chloropterus</i>             | BRA               | 26                  |
| <i>Ara macao*</i>                   | COL               | 97                  |
| <i>Aratinga aurea</i>               | BRA               | 38                  |
| <i>Aratinga cactorum</i>            | BRA               | 38,                 |
| <i>Aratinga jandaya</i>             | BRA               | 38, 40              |

|                                  |               |                                        |
|----------------------------------|---------------|----------------------------------------|
| <i>Aratinga leucophthalma</i>    | PER           | 38,40                                  |
| <i>Aratinga nana</i>             | JAM           | 10                                     |
| <i>Aratinga pertinax</i>         | BRA, VEN      | 9,35,38                                |
| <i>Brotogeris chiriri</i>        | BRA           | 26,38,42                               |
| <i>Brotogeris cyanopectus</i> *  | PER           | 49                                     |
| <i>Brotogeris jugularis</i>      | COL, PAN      | 3,95                                   |
| <i>Brotogeris tirica</i>         | BRA           | 117                                    |
| <i>Brotogeris versicolurus</i> * | BRA, COL      | 97, 117                                |
| <i>Diopsittacus nobilis</i> *    | BRA           | 26                                     |
| <i>Eupsittula aurea</i>          | BRA           | 26                                     |
| <i>Eupsittula pertinax</i>       | COL           | 3, 97                                  |
| <i>Forpus passerinus</i> *       | BRA, JAM      | 10, 117                                |
| <i>Forpus conspicillatus</i> *   | COL, PAN      | 3, 95                                  |
| <i>Melopsittacus undulatus</i>   | PER           | 49                                     |
| <i>Myiopsitta monachus</i>       | ARG, BRA      | 38, 42                                 |
| <i>Nandayus nenday</i>           | BRA           | 38                                     |
| <i>Orthopsittacus manilata</i> * | BRA           | 42                                     |
| <i>Pionites leucogaster</i>      | BRA           | 35, 38, 40                             |
| <i>Pionus maximiliani</i>        | BRA           | 117                                    |
| <i>Pionus menstruus</i>          | BOL, PER      | 13, 38, 40,                            |
| <i>Primolius maracana</i>        | BRA           | 19                                     |
| <i>Psittacara leucophthalmus</i> | BRA           | 19,26                                  |
| <i>Psittacara wagleri</i>        | PER           | 49                                     |
| <i>Psittacara weddellii</i>      | PER           | 49                                     |
| <i>Pyrrhura calliptera</i>       | COL           | 51, 61, 62                             |
| <i>Pyrrhura frontalis</i>        | BRA           | 5, 117                                 |
| <i>Pyrrhura hoffmanni</i>        | PAN           | 95                                     |
| <i>Pyrrhura lepida</i>           | BRA           | 38, 40                                 |
| <i>Pyrrhura rhodogaster</i>      | BOL           | 13                                     |
| <i>Touit huetii</i>              | COL           | 51, 61, 62                             |
| <i>Triclaria malachitacea</i>    | BRA           | 117                                    |
| Sphenisciformes                  |               |                                        |
| Spheniscidae                     |               |                                        |
| <i>Spheniscus humboldti</i>      | CHL           | 87                                     |
| <i>Spheniscus magellanicus</i>   | CHL           | 87                                     |
| Strigiformes                     |               |                                        |
| Strigidae                        |               |                                        |
| <i>Asio clamator</i>             | BRA           | 19,22,86                               |
| <i>Asio stygius</i>              | BRA           | 86                                     |
| <i>Athene cunicularia</i> *      | BRA, COL      | 15, 19, 22, 26, 51, 61, 62,<br>86, 117 |
| <i>Bubo virginianus</i>          | BRA           | 4                                      |
| <i>Glaucidium brasilianum</i>    | ARG, BRA, PER | 4, 15, 38, 42, 49, 117                 |
| <i>Glaucidium minutissimum</i>   | BRA           | 19                                     |
| <i>Megascops choliba</i>         | BRA           | 4, 15, 19, 22, 38                      |

|               |                                   |               |                            |
|---------------|-----------------------------------|---------------|----------------------------|
|               | <i>Megascops guatemalae</i>       | PAN           | 95                         |
|               | <i>Megascops ingens</i>           | PER           | 38, 40                     |
|               | <i>Megascops sp.</i>              | COL           | 97                         |
|               | <i>Megascops usta</i>             | BRA           | 35                         |
|               | <i>Megascops watsonii</i>         | BRA           | 35, 38, 40                 |
|               | <i>Pulsatrix perspicillata</i>    | BRA           | 35, 38, 40                 |
|               | <i>Strix huhula</i>               | BRA           | 4, 35, 38, 40              |
|               | <i>Strix virgata</i>              | BRA           | 4, 35, 38, 99              |
| Tytonidae     |                                   |               |                            |
|               | <i>Tyto alba</i>                  | BRA           | 4,86                       |
|               | <i>Tyto furcata</i>               | BRA           | 26,19                      |
| Suliformes    |                                   |               |                            |
| Anhingidae    |                                   |               |                            |
|               | <i>Anhinga anhinga*</i>           | BRA           | 38, 40, 42                 |
| Sulidae       |                                   |               |                            |
|               | <i>Sula neboxii*</i>              | COL           | 97                         |
| Tinamiformes  |                                   |               |                            |
| Tinamidae     |                                   |               |                            |
|               | <i>Crypturellus noctivagus</i>    | BRA           | 117                        |
|               | <i>Crypturellus obsoletus</i>     | BRA, PER      | 40, 117                    |
|               | <i>Crypturellus parvirostris*</i> | BRA           | 15, 38, 117                |
|               | <i>Crypturellus soui*</i>         | BRA, PAN      | 35, 38, 40, 95             |
|               | <i>Crypturellus undulatus</i>     | BRA           | 40                         |
|               | <i>Nothocercus julius</i>         | COL           | 51, 61, 62                 |
|               | <i>Nothocercus nigrocapillus</i>  | PER           | 38, 40                     |
| Trogoniformes |                                   |               |                            |
| Trogonidae    |                                   |               |                            |
|               | <i>Pharomachrus auriceps</i>      | PER           | 38, 40                     |
|               | <i>Priotelus roseigaster</i>      | RD            | 56                         |
|               | <i>Trogon clathratus</i>          | PAN           | 95                         |
|               | <i>Trogon collaris</i>            | BRA, COL, PER | 35, 38, 40, 49, 51, 61, 62 |
|               | <i>Trogon curucui</i>             | BRA           | 28                         |
|               | <i>Trogon melanurus</i>           | BOL, BRA      | 13,38                      |
|               | <i>Trogon massena*</i>            | PAN           | 95                         |
|               | <i>Trogon melanocephalus</i>      | NIC           | 40                         |
|               | <i>Trogon personatus</i>          | COL, PER      | 38, 40, 97                 |
|               | <i>Trogon rufus</i>               | BRA, NIC, PAN | 35, 38, 40, 95,            |
|               | <i>Trogon violaceus</i>           | CR, PAN       | 95, 104                    |
|               | <i>Trogon viridis</i>             | BRA           | 35, 38, 40                 |

\*Species reported non infected in White et al., [17]

Table S4: Kimura-two- parameters pairwise genetic distances between lineages in Figs 5, 6 and 7. Standard deviation is provided.

| Species 1                                      | vs | Species 2                                       | Gen dist | Std     |
|------------------------------------------------|----|-------------------------------------------------|----------|---------|
| <i>Haemoproteus</i>                            |    |                                                 |          |         |
| DQ212192 - <i>Haemoproteus</i> sp.             | vs | KJ592828 - DENAUT01- <i>H. macrovacuolatus</i>  | 0.01089  | 0.00503 |
| DQ212192 - <i>Haemoproteus</i> sp.             | vs | OL456193 - CAIMOS01 - <i>H. gabaldoni</i>       | 0.01971  | 0.00648 |
| KJ592828 - DENAUT01- <i>H. macrovacuolatus</i> | vs | MF062004 - <i>Haemoproteus</i> sp               | 0.00632  | 0.00386 |
| KJ592828 - DENAUT01- <i>H. macrovacuolatus</i> | vs | OL456193 - CAIMOS01 <i>H. gabaldoni</i>         | 0.00843  | 0.00434 |
| KJ592828 - DENAUT01- <i>H. macrovacuolatus</i> | vs | MK330144 - CULKIB01 - <i>H. syrnii</i>          | 0.05212  | 0.01062 |
| KJ592828 - DENAUT01- <i>H. macrovacuolatus</i> | vs | KY783725 - ARCHL01 - <i>H. homohandai</i>       | 0.05222  | 0.01079 |
| KJ592828 - DENAUT01- <i>H. macrovacuolatus</i> | vs | MK216058 - CHOMIN01 - <i>Haemoproteus</i> sp.   | 0.05445  | 0.00978 |
| KJ592828 - DENAUT01- <i>H. macrovacuolatus</i> | vs | MF536976 - <i>H. plataleae</i>                  | 0.05724  | 0.01126 |
| KJ592828 - DENAUT01- <i>H. macrovacuolatus</i> | vs | OP087649 - CHOACU01- <i>H. caprimulgi</i>       | 0.06121  | 0.01062 |
| KJ592828 - DENAUT01- <i>H. macrovacuolatus</i> | vs | MH311672 - MELCAR01 - <i>H. velans</i>          | 0.06361  | 0.01162 |
| KJ592828 - DENAUT01- <i>H. macrovacuolatus</i> | vs | KP462687 - MEAPI01- <i>H. manwelli</i>          | 0.07729  | 0.01302 |
| KJ592828 - DENAUT01- <i>H. macrovacuolatus</i> | vs | KU364540 - TROAED20 - <i>H. witti</i>           | 0.08427  | 0.01379 |
| KJ592828 - DENAUT01- <i>H. macrovacuolatus</i> | vs | MF095653- WW1 - <i>H. palloris</i>              | 0.08677  | 0.0126  |
| KJ592828 - DENAUT01- <i>H. macrovacuolatus</i> | vs | MH036944 - ABJAC01 - <i>H. paraortalidum</i>    | 0.08896  | 0.01455 |
| KJ592828 - DENAUT01- <i>H. macrovacuolatus</i> | vs | MT513738- RW1 - <i>H. payevskyi</i>             | 0.08898  | 0.01214 |
| KJ592828 - DENAUT01- <i>H. macrovacuolatus</i> | vs | MW548594 - <i>H. archilochus</i>                | 0.08917  | 0.0126  |
| KJ592828 - DENAUT01- <i>H. macrovacuolatus</i> | vs | MF953291 - CATAUR01 - <i>H. catharti</i>        | 0.09605  | 0.01548 |
| KJ592828 - DENAUT01- <i>H. macrovacuolatus</i> | vs | KT698209 - ZOCAP14 - <i>H. erythrogravidus</i>  | 0.09855  | 0.01492 |
| KJ592828 - DENAUT01- <i>H. macrovacuolatus</i> | vs | MF817760 - TABI02 - <i>H. paruli</i>            | 0.10587  | 0.01413 |
| KJ592828 - DENAUT01- <i>H. macrovacuolatus</i> | vs | MN025423 - DELURB1 - <i>H. hirundinis</i>       | 0.11304  | 0.01288 |
| KJ592828 - DENAUT01- <i>H. macrovacuolatus</i> | vs | MT724554 - TANDES01 - <i>H. nucleocentralis</i> | 0.11309  | 0.01656 |
| KJ592828 - DENAUT01- <i>H. macrovacuolatus</i> | vs | MK580171 - FALSUB01 - <i>H. tinnunculi</i>      | 0.11369  | 0.01802 |
| KJ592828 - DENAUT01- <i>H. macrovacuolatus</i> | vs | MZ571108- SYAT01 - <i>H. parabelopolskyi</i>    | 0.11563  | 0.01532 |
| KJ592828 - DENAUT01- <i>H. macrovacuolatus</i> | vs | OL906298 - <i>H. pulcher</i>                    | 0.1183   | 0.01649 |
| OL456193 - CAIMOS01- <i>H. gabaldoni</i>       | vs | HQ724292 - COLVIR03- <i>Haemoproteus</i> sp.    | 0.057    | 0.011   |
| OL456193 - CAIMOS01- <i>H. gabaldoni</i>       | vs | MK216058 - CHOMIN01 <i>Haemoproteus</i> sp.     | 0.05218  | 0.00987 |
| OL456193 - CAIMOS01- <i>H. gabaldoni</i>       | vs | MK330144 - CULKIB01 - <i>H. syrnii</i>          | 0.05438  | 0.01127 |
| OL456193 - CAIMOS01- <i>H. gabaldoni</i>       | vs | MF536976 - <i>H. plataleae</i>                  | 0.05493  | 0.01131 |
| OL456193 - CAIMOS01- <i>H. gabaldoni</i>       | vs | OP087649 - CHOACU01- <i>H. caprimulgi</i>       | 0.06121  | 0.01122 |
| OL456193 - CAIMOS01- <i>H. gabaldoni</i>       | vs | MH311672 - MELCAR01 - <i>H. velans</i>          | 0.0613   | 0.01172 |
| OL456193 - CAIMOS01- <i>H. gabaldoni</i>       | vs | MW548594 - <i>H. archilochus</i>                | 0.09158  | 0.01256 |
| OL456193 - CAIMOS01- <i>H. gabaldoni</i>       | vs | MT513738- RW1 - <i>H. payevskyi</i>             | 0.09377  | 0.01232 |
| OL456193 - CAIMOS01- <i>H. gabaldoni</i>       | vs | MF095653- WW1 - <i>H. palloris</i>              | 0.09387  | 0.0129  |
| OL456193 - CAIMOS01- <i>H. gabaldoni</i>       | vs | MH036944 - ABJAC01 - <i>H. paraortalidum</i>    | 0.09607  | 0.01487 |
| OL456193 - CAIMOS01- <i>H. gabaldoni</i>       | vs | MF953291 - CATAUR01 - <i>H. catharti</i>        | 0.09845  | 0.0155  |
| OL456193 - CAIMOS01- <i>H. gabaldoni</i>       | vs | MF817760 - TABI02 - <i>H. paruli</i>            | 0.1108   | 0.01385 |
| OL456193 - CAIMOS01- <i>H. gabaldoni</i>       | vs | MN025423 - DELURB1 - <i>H. hirundinis</i>       | 0.11551  | 0.01288 |
| OL456193 - CAIMOS01- <i>H. gabaldoni</i>       | vs | MZ571108- SYAT01 - <i>H. parabelopolskyi</i>    | 0.11563  | 0.01542 |
| OL456193 - CAIMOS01- <i>H. gabaldoni</i>       | vs | MK580171 - FALSUB01 - <i>H. tinnunculi</i>      | 0.11621  | 0.01805 |
| OL456193 - CAIMOS01- <i>H. gabaldoni</i>       | vs | MT724554 - TANDES01 - <i>H. nucleocentralis</i> | 0.11806  | 0.01583 |

|                                                      |    |                                                      |         |         |
|------------------------------------------------------|----|------------------------------------------------------|---------|---------|
| OL456193 – CAIMOS01- <i>H. gabaldoni</i>             | vs | GQ141557 - ANACRE01 - <i>Haemoproteus</i> sp.        | 0.0501  | 0.0107  |
| KY653794 - TROAED20 - <i>H. witti</i>                | vs | MW548594 - <i>H. archilochus</i>                     | 0.0728  | 0.011   |
| KY653794 - TROAED20 - <i>H. witti</i>                | vs | MW492355 -TUPHI01– <i>H. asymmetricus</i>            | 0.02342 | 0.00569 |
| KY653794 - TROAED20 - <i>H. witti</i>                | vs | KY783725 - ARCHL01 - <i>H. homohandai</i>            | 0.04537 | 0.00916 |
| KY653794 - TROAED20 - <i>H. witti</i>                | vs | KY777423 – PADOM05 – <i>H. passeris</i>              | 0.04537 | 0.00770 |
| KY653794 - TROAED20 - <i>H. witti</i>                | vs | KY653807 – SISKIN1 - <i>H. tartakovskyi</i>          | 0.05218 | 0.01110 |
| KY653794 - TROAED20 - <i>H. witti</i>                | vs | MT513734 – GRW01 – <i>H. nucleocondensus</i>         | 0.05670 | 0.01197 |
| KY653794 - TROAED20 - <i>H. witti</i>                | vs | LC230122 - NUMPHA01 - <i>Haemoproteus</i> sp.        | 0.05889 | 0.01226 |
| KY653794 - TROAED20 - <i>H. witti</i>                | vs | KY653799- LULU1– <i>H. balmorali</i>                 | 0.05892 | 0.01153 |
| KY653794 - TROAED20 - <i>H. witti</i>                | vs | MF817760 – TABI02 – <i>H. paruli</i>                 | 0.06121 | 0.00961 |
| KY653794 - TROAED20 - <i>H. witti</i>                | vs | MK216058 - CHOMIN01 <i>Haemoproteus</i> sp.          | 0.07262 | 0.01329 |
| KY653794 - TROAED20 - <i>H. witti</i>                | vs | OL906298 - <i>H. pulcher</i>                         | 0.08206 | 0.01177 |
| KY653794 - TROAED20 - <i>H. witti</i>                | vs | MK580170 – LK3 - <i>H. brachiatus</i>                | 0.10165 | 0.01421 |
| KY653794 - TROAED20 - <i>H. witti</i>                | vs | KY653760 - CREFUR01 - <i>H. jenniae</i>              | 0.10098 | 0.01398 |
| KY653794 - TROAED20 - <i>H. witti</i>                | vs | OL689176 - COLPAS03 - <i>H. paramultipigmentatus</i> | 0.10840 | 0.01351 |
| KY653794 - TROAED20 - <i>H. witti</i>                | vs | KY653756 - ZEGAL05 - <i>H. multipigmentatus</i>      | 0.14065 | 0.01886 |
| KY653794 - TROAED20 - <i>H. witti</i>                | vs | KY653761 – HAECOL01 - <i>H. columbae</i>             | 0.15072 | 0.01758 |
| MK216058 - CHOMIN01 - <i>Haemoproteus</i> sp.        | vs | OP087649 –CHOACU01- <i>H. caprimulgi</i>             | 0.0191  | 0.0059  |
| MK216058 - CHOMIN01 - <i>Haemoproteus</i> sp.        | vs | OL689174 –NYCALB02- <i>H. caprimulgi</i>             | 0.0127  | 0.0052  |
| OL689174 –NYCALB02- <i>H. caprimulgi</i>             | vs | KY783725 - ARCHL01 - <i>H. homohandai</i>            | 0.02779 | 0.00836 |
| OL689174 –NYCALB02- <i>H. caprimulgi</i>             | vs | KJ575554 - <i>H. syrnii</i>                          | 0.03447 | 0.00855 |
| OL689174 –NYCALB02- <i>H. caprimulgi</i>             | vs | KY653763 – TURDUS2 – <i>H. minutus</i>               | 0.06348 | 0.01410 |
| OL689174 –NYCALB02- <i>H. caprimulgi</i>             | vs | LC230122 - NUMPHA01 - <i>Haemoproteus</i> sp.        | 0.06575 | 0.01373 |
| OL689174 –NYCALB02- <i>H. caprimulgi</i>             | vs | KF537321 - VIOLI06 – <i>H. vireonis</i>              | 0.06799 | 0.01043 |
| OL689174 –NYCALB02- <i>H. caprimulgi</i>             | vs | GQ396708 – HAWF2 – <i>H. concavocentralis</i>        | 0.06801 | 0.01326 |
| OL689174 –NYCALB02- <i>H. caprimulgi</i>             | vs | KT698209 – ZOCAP14 - <i>H. erythrogravidus</i>       | 0.08902 | 0.01458 |
| OL689174 –NYCALB02- <i>H. caprimulgi</i>             | vs | JN661945 – ZOSMAD01- <i>H. killangoi</i>             | 0.08906 | 0.01376 |
| OL689174 –NYCALB02- <i>H. caprimulgi</i>             | vs | MK580170 – LK3 - <i>H. brachiatus</i>                | 0.09918 | 0.01760 |
| OL689174 –NYCALB02- <i>H. caprimulgi</i>             | vs | OL906298 - - <i>H. pulcher</i>                       | 0.10848 | 0.01741 |
| OL689174 –NYCALB02- <i>H. caprimulgi</i>             | vs | JF833050 - FREMIN01 - <i>H. iwa</i>                  | 0.12065 | 0.01623 |
| OL689174 –NYCALB02- <i>H. caprimulgi</i>             | vs | KY653761 – HAECOL01 - <i>H. columbae</i>             | 0.15864 | 0.01803 |
| JN788934 - COLPAS03 - <i>H. paramultipigmentatus</i> | vs | OP087648 –COPIC01- <i>H. paramultipigmentatus</i>    | 0.0021  | 0.0019  |
| JN788934 - COLPAS03 - <i>H. paramultipigmentatus</i> | vs | OL689176 - COLPAS03 - <i>H. paramultipigmentatus</i> | 0       | 0       |
| KY653756 - ZEGAL05 - <i>H. multipigmentatus</i>      | vs | KY653761 – HAECOL01 - <i>H. columbae</i>             | 0.0985  | 0.0154  |
| OL689177 – COSQU01- <i>Haemoproteus</i> sp.          | vs | JX029921 - COSQU01 - <i>Haemoproteus</i> sp.         | 0       | 0       |
| OL689177 – COSQU01- <i>Haemoproteus</i> sp.          | vs | JN788934 - COLPAS03 - <i>H. paramultipigmentatus</i> | 0.03652 | 0.00822 |
| OL689176 - COLPAS03 - <i>H. paramultipigmentatus</i> | vs | JF833050 - FREMIN01 - <i>H. iwa</i>                  | 0.06125 | 0.01078 |
| OL689176 - COLPAS03 - <i>H. paramultipigmentatus</i> | vs | KX100323 -CRALOU01- <i>H. bukaka</i>                 | 0.11347 | 0.01249 |
| OL689176 - COLPAS03 - <i>H. paramultipigmentatus</i> | vs | OM311289 – GAGLA07 – <i>H. homopicae</i>             | 0.12065 | 0.01383 |
| OL689176 - COLPAS03 - <i>H. paramultipigmentatus</i> | vs | DQ847194 –BUL1 – <i>H. sanguinis</i>                 | 0.12317 | 0.01470 |
| OL689176 - COLPAS03 - <i>H. paramultipigmentatus</i> | vs | KJ575554 - <i>H. syrnii</i>                          | 0.12376 | 0.01557 |
| OL689176 - COLPAS03 - <i>H. paramultipigmentatus</i> | vs | KY653752 – TANIG01- <i>H. coatneyi</i>               | 0.12592 | 0.01442 |
| OL689176 - COLPAS03 - <i>H. paramultipigmentatus</i> | vs | KY653811 - ZEMAC17 - <i>H. sacharovi</i>             | 0.12592 | 0.01583 |
| OL689176 - COLPAS03 - <i>H. paramultipigmentatus</i> | vs | HQ386242 – MALRUB01 – <i>H. paranucleophilus</i>     | 0.12691 | 0.01603 |

|                                                                   |    |                                                                   |         |         |
|-------------------------------------------------------------------|----|-------------------------------------------------------------------|---------|---------|
| OL689176 - COLPAS03 - <i>H. paramultipigmentatus</i>              | vs | MF953291 - CATAUR01 - <i>H. catharti</i>                          | 0.12792 | 0.01353 |
| OL689176 - COLPAS03 - <i>H. paramultipigmentatus</i>              | vs | KJ592828 - DENAUT01 - <i>H. macrovacuolatus</i>                   | 0.12816 | 0.01444 |
| OP087643 - MONNIG02 - <i>Haemoproteus</i> sp.                     | vs | MK330144 - CULKIB01 - <i>H. syrnii</i>                            | 0.02126 | 0.00532 |
| OP087643 - MONNIG02 - <i>Haemoproteus</i> sp.                     | vs | KY653811 - ZEMAC17 - <i>H. sacharovi</i>                          | 0.02996 | 0.00788 |
| OP087643 - MONNIG02 - <i>Haemoproteus</i> sp.                     | vs | OL689174 - NYCALB02 - <i>H. caprimulgi</i>                        | 0.03212 | 0.00745 |
| OP087643 - MONNIG02 - <i>Haemoproteus</i> sp.                     | vs | KF747371 - STVAR01 - <i>H. syrnii</i>                             | 0.03653 | 0.00942 |
| OP087643 - MONNIG02 - <i>Haemoproteus</i> sp.                     | vs | JN164720 - SYAT03 - <i>H. pallidulus</i>                          | 0.06799 | 0.01279 |
| OP087643 - MONNIG02 - <i>Haemoproteus</i> sp.                     | vs | KY653794 - TROAED20 - <i>H. witti</i>                             | 0.07722 | 0.01316 |
| OP087643 - MONNIG02 - <i>Haemoproteus</i> sp.                     | vs | KP462688 - MEAPI02 - <i>H. gavrilovi</i>                          | 0.07956 | 0.01291 |
| OP087643 - MONNIG02 - <i>Haemoproteus</i> sp.                     | vs | KY653768 - YWT1 - <i>H. motacillae</i>                            | 0.08672 | 0.01285 |
| OP087643 - MONNIG02 - <i>Haemoproteus</i> sp.                     | vs | MN025423 - DELURB1 - <i>H. hirundinis</i>                         | 0.09844 | 0.01219 |
| OP087643 - MONNIG02 - <i>Haemoproteus</i> sp.                     | vs | KT698209 - ZOCAP14 - <i>H. erythrogravidus</i>                    | 0.09848 | 0.01366 |
| OP087643 - MONNIG02 - <i>Haemoproteus</i> sp.                     | vs | OL689176 - COLPAS03 - <i>H. paramultipigmentatus</i>              | 0.13310 | 0.01586 |
| OP087643 - MONNIG02 - <i>Haemoproteus</i> sp.                     | vs | OL689174 - NYCALB02 - <i>H. caprimulgi</i>                        | 0.03212 | 0.00745 |
| OP087643 - MONNIG02 - <i>Haemoproteus</i> sp.                     | vs | KY653761 - HAECOL01 - <i>H. columbae</i>                          | 0.15846 | 0.01775 |
| OP087643 - MONNIG02 - <i>Haemoproteus</i> sp.                     | vs | MG598390 - MONNIG02 - <i>Haemoproteus</i> sp.                     | 0       | 0       |
| OP087645 - ASICLA01 - <i>Haemoproteus</i> sp. <i>syrnii</i> -like | vs | OP087640 - PSDIS01 - <i>Haemoproteus</i> sp.                      | 0.0084  | 0.004   |
| OP087645 - ASICLA01 - <i>Haemoproteus</i> sp. <i>syrnii</i> -like | vs | KF279523 - STAL2 - <i>H. syrnii</i>                               | 0.0127  | 0.0052  |
| OP087645 - ASICLA01 - <i>Haemoproteus</i> sp. <i>syrnii</i> -like | vs | KF747371 - STVAR01 - <i>H. syrnii</i>                             | 0.0084  | 0.0037  |
| OP087640 - PSDIS01 - <i>Haemoproteus</i> sp. <i>syrnii</i> -like  | vs | KF279523 - STAL2 - <i>H. syrnii</i>                               | 0.0127  | 0.006   |
| OP087640 - PSDIS01 - <i>Haemoproteus</i> sp. <i>syrnii</i> -like  | vs | KF747371 - STVAR01 - <i>H. syrnii</i>                             | 0.0084  | 0.0047  |
| KF279523 - STAL2 - <i>H. syrnii</i>                               | vs | KF279523 - STAL2 - <i>H. syrnii</i>                               | 0.0344  | 0.008   |
| KF747371 - STVAR01 - <i>Haemoproteus</i> sp.                      | vs | KF279523 - STAL2 - <i>H. syrnii</i>                               | 0.03    | 0.007   |
| OP087645 - ASICLA01 - <i>Haemoproteus</i> sp. <i>syrnii</i> -like | vs | KF279523 - STAL2 - <i>H. syrnii</i>                               | 0.0322  | 0.0078  |
| OP087640 - PSDIS01 - <i>Haemoproteus</i> sp. <i>syrnii</i> -like  | vs | KF279523 - STAL2 - <i>H. syrnii</i>                               | 0.0322  | 0.0085  |
| OL598519 - CIRCUM01 - <i>H. noctuae</i>                           | vs | OP087640 - PSDIS01 - <i>Haemoproteus</i> sp.                      | 0.032   | 0.009   |
| OL598519 - CIRCUM01 - <i>H. noctuae</i>                           | vs | OP087645 - ASICLA01 - <i>Haemoproteus</i> sp. <i>syrnii</i> -like | 0.032   | 0.008   |
| OP087645 - ASICLA01 - <i>Haemoproteus</i> sp. <i>syrnii</i> -like | vs | MK580170 - LK3 - <i>H. brachiatus</i>                             | 0.104   | 0.017   |
| OP087640 - PSDIS01 - <i>Haemoproteus</i> sp. <i>syrnii</i> -like  | vs | MK580170 - LK3 - <i>H. brachiatus</i>                             | 0.109   | 0.017   |
| OP087645 - ASICLA01 - <i>Haemoproteus</i> sp. <i>syrnii</i> -like | vs | DQ659592 - ALCLEU01 - <i>H. enucleator</i>                        | 0.02564 | 0.00668 |
| OP087645 - ASICLA01 - <i>Haemoproteus</i> sp. <i>syrnii</i> -like | vs | OP087643 - MONNIG02 - <i>Haemoproteus</i> sp.                     | 0.03653 | 0.00946 |
| OP087645 - ASICLA01 - <i>Haemoproteus</i> sp. <i>syrnii</i> -like | vs | OL689174 - NYCALB02 - <i>H. caprimulgi</i>                        | 0.03658 | 0.00880 |
| OP087645 - ASICLA01 - <i>Haemoproteus</i> sp. <i>syrnii</i> -like | vs | AY393805 - CWT4 - <i>H. majoris</i>                               | 0.04988 | 0.01016 |
| OP087645 - ASICLA01 - <i>Haemoproteus</i> sp. <i>syrnii</i> -like | vs | KY653794 - TROAED20 - <i>H. witti</i>                             | 0.05661 | 0.01153 |
| OP087645 - ASICLA01 - <i>Haemoproteus</i> sp. <i>syrnii</i> -like | vs | OL456193 - CAIMOS01 - <i>H. gabaldoni</i>                         | 0.05685 | 0.01142 |
| OP087645 - ASICLA01 - <i>Haemoproteus</i> sp. <i>syrnii</i> -like | vs | EU770153 - ANLA1 - <i>H. vacuolatus</i>                           | 0.06005 | 0.01026 |
| OP087645 - ASICLA01 - <i>Haemoproteus</i> sp. <i>syrnii</i> -like | vs | KT698210 - ZOCAP13 - <i>H. coatneyi</i>                           | 0.06583 | 0.01280 |
| OP087645 - ASICLA01 - <i>Haemoproteus</i> sp. <i>syrnii</i> -like | vs | JN661945 - ZOSMAD01 - <i>H. killangoi</i>                         | 0.06932 | 0.01273 |
| OP087645 - ASICLA01 - <i>Haemoproteus</i> sp. <i>syrnii</i> -like | vs | KU160476 - CORCRI01 - <i>H. minchini</i>                          | 0.07278 | 0.01417 |
| OP087645 - ASICLA01 - <i>Haemoproteus</i> sp. <i>syrnii</i> -like | vs | FJ404696 - CYAOLI03 - <i>H. cyanomitrae</i>                       | 0.07513 | 0.01215 |
| OP087645 - ASICLA01 - <i>Haemoproteus</i> sp. <i>syrnii</i> -like | vs | MT119966 - HIRUS5 - <i>H. parahirundinis</i>                      | 0.09393 | 0.01534 |
| OP087645 - ASICLA01 - <i>Haemoproteus</i> sp. <i>syrnii</i> -like | vs | KY653760 - CREFUR01 - <i>H. jenniae</i>                           | 0.10593 | 0.01484 |
| OP087645 - ASICLA01 - <i>Haemoproteus</i> sp. <i>syrnii</i> -like | vs | OL689176 - COLPAS03 - <i>H. paramultipigmentatus</i>              | 0.12105 | 0.01642 |
| OP087645 - ASICLA01 - <i>Haemoproteus</i> sp. <i>syrnii</i> -like | vs | KY653756 - ZEGAL05 - <i>H. multipigmentatus</i>                   | 0.13083 | 0.01789 |

|                                                                 |    |                                                 |         |         |
|-----------------------------------------------------------------|----|-------------------------------------------------|---------|---------|
| OP087640 –PSDIS01- <i>Haemoproteus</i> sp. <i>synnii</i> - like | vs | OP087643 – MONNIG02 - <i>Haemoproteus</i> sp.   | 0.03655 | 0.00862 |
| OP087640 –PSDIS01- <i>Haemoproteus</i> sp. <i>synnii</i> - like | vs | MT119966 – HIRUS5 – <i>H. parahirundinis</i>    | 0.09872 | 0.01416 |
| <i>Plasmodium</i>                                               |    |                                                 |         |         |
| OP087644 – DENPET03 – <i>P. nucleophilum</i>                    | vs | AY178904– PADOM16 – <i>P. rouxi</i>             | 0.08430 | 0.01341 |
| OP087644 – DENPET03 – <i>P. nucleophilum</i>                    | vs | AY733089 - ZEMAC01 – <i>Plasmodium</i> sp.      | 0.07268 | 0.01000 |
| OP087644 – DENPET03 – <i>P. nucleophilum</i>                    | vs | AY733088 – PADOM11 - <i>P. elongatum</i>        | 0.07258 | 0.01253 |
| OP087644 – DENPET03 – <i>P. nucleophilum</i>                    | vs | FJ389156 – CYAOL109 - <i>P. lucens</i>          | 0.08131 | 0.01255 |
| OP087644 – DENPET03 – <i>P. nucleophilum</i>                    | vs | JQ988612– CLAPRE02 – <i>Plasmodium</i> sp.      | 0.06803 | 0.01279 |
| OP087644 – DENPET03 – <i>P. nucleophilum</i>                    | vs | JX467689 - DENPET03 - <i>P. nucleophilum</i>    | 0.00000 | 0.00000 |
| OP087644 – DENPET03 – <i>P. nucleophilum</i>                    | vs | KU529943 – COLL06 - <i>P. delichoni</i>         | 0.05663 | 0.01118 |
| OP087644 – DENPET03 – <i>P. nucleophilum</i>                    | vs | KY653754 - BUBSCA01 – <i>P. cathemerium</i>     | 0.07722 | 0.01314 |
| OP087644 – DENPET03 – <i>P. nucleophilum</i>                    | vs | KY653775 - GRW02 - <i>P. ashfordi</i>           | 0.05904 | 0.01144 |
| OP087644 – DENPET03 – <i>P. nucleophilum</i>                    | vs | KY653784 - COLL4 - <i>P. homocircumflexum</i>   | 0.07491 | 0.01208 |
| OP087644 – DENPET03 – <i>P. nucleophilum</i>                    | vs | KY653792 – SYAT05 – <i>P. vaughani</i>          | 0.07738 | 0.01343 |
| OP087644 – DENPET03 – <i>P. nucleophilum</i>                    | vs | KY653802 - GRW06 - <i>P. elongatum</i>          | 0.07498 | 0.01046 |
| OP087644 – DENPET03 – <i>P. nucleophilum</i>                    | vs | MK695452- AMABRA01 - <i>Plasmodium</i> sp.      | 0.00633 | 0.00391 |
| OP087644 – DENPET03 – <i>P. nucleophilum</i>                    | vs | MN458617 - COLTAL05 - <i>Plasmodium</i> sp.     | 0.01056 | 0.00513 |
| OP087644 – DENPET03 – <i>P. nucleophilum</i>                    | vs | NC008279 – GALLUS02 – <i>P. juxtannucleare</i>  | 0.08427 | 0.01382 |
| OP087647 – NYCALB03 - <i>Plasmodium</i> sp.                     | vs | AY178904 – PADOM16 – <i>P. rouxi</i>            | 0.07317 | 0.01158 |
| OP087647 – NYCALB03- <i>Plasmodium</i> sp.                      | vs | AY733089 – ZEMAC01 – <i>Plasmodium</i> sp.      | 0.03017 | 0.00790 |
| OP087647 – NYCALB03- <i>Plasmodium</i> sp.                      | vs | DQ241528 - BUTSTR01 - <i>Plasmodium</i> sp.     | 0.03481 | 0.00697 |
| OP087647 – NYCALB03- <i>Plasmodium</i> sp.                      | vs | EF380144 – CPOMAL02 – <i>Plasmodium</i> sp.     | 0.06619 | 0.01231 |
| OP087647 – NYCALB03- <i>Plasmodium</i> sp.                      | vs | JX467689 - DENPET03 - <i>P. nucleophilum</i>    | 0.06614 | 0.01149 |
| OP087647 – NYCALB03- <i>Plasmodium</i> sp.                      | vs | KY653751 - <i>Plasmodium</i> sp.                | 0.06382 | 0.01139 |
| OP087647 – NYCALB03- <i>Plasmodium</i> sp.                      | vs | KY653754 - BUBSCA01 – <i>P. cathemerium</i>     | 0.04791 | 0.00920 |
| OP087647 – NYCALB03- <i>Plasmodium</i> sp.                      | vs | KY653775 - GRW02 - <i>P. ashfordi</i>           | 0.06619 | 0.01184 |
| OP087647 – NYCALB03- <i>Plasmodium</i> sp.                      | vs | MK652235 - LINN1 - <i>P. matutinum</i>          | 0.03459 | 0.00912 |
| OP087647 – NYCALB03- <i>Plasmodium</i> sp.                      | vs | OL598516- GRW06 - <i>P. elongatum</i>           | 0.03679 | 0.00968 |
| OL689171 - SPMAG04 - <i>P. tejeraei</i>                         | vs | DQ241528 - BUTSTR01 - <i>Plasmodium</i> sp.     | 0.00210 | 0.00221 |
| OL689171 - SPMAG04 - <i>P. tejeraei</i>                         | vs | EU770151 –ANLAT01– <i>P. globularis</i>         | 0.08855 | 0.01369 |
| OL689171 - SPMAG04 - <i>P. tejeraei</i>                         | vs | EU770152 – PYSUN1 - <i>P. megaglobularis</i>    | 0.06479 | 0.01303 |
| OL689171 - SPMAG04 - <i>P. tejeraei</i>                         | vs | JX467689 - DENPET03 - <i>P. nucleophilum</i>    | 0.07729 | 0.01289 |
| OL689171 - SPMAG04 - <i>P. tejeraei</i>                         | vs | KX159495- MYCAME02 - <i>P. paranucleophilum</i> | 0.08667 | 0.01304 |
| OL689171 - SPMAG04 - <i>P. tejeraei</i>                         | vs | KY653775 - GRW02 - <i>P. ashfordi</i>           | 0.08911 | 0.01316 |
| OL689171 - SPMAG04 - <i>P. tejeraei</i>                         | vs | KY653802 - GRW06 - <i>P. elongatum</i>          | 0.05666 | 0.01116 |
| OL689171 - SPMAG04 - <i>P. tejeraei</i>                         | vs | MN458757 - MONNIG01 - <i>Plasmodium</i> sp.     | 0.05238 | 0.00895 |
| OL689171 - SPMAG04 - <i>P. tejeraei</i>                         | vs | NC008279 – GALLUS02 – <i>P. juxtannucleare</i>  | 0.08690 | 0.01652 |
| OP087639 –GRW06- <i>P. elongatum</i>                            | vs | AB250690 – GALLUS01 – <i>P. gallinaceum</i>     | 0.06570 | 0.01246 |
| OP087637 - CYCYA01 - <i>Plasmodium</i> sp.                      | vs | AB250690 – GALLUS01 – <i>P. gallinaceum</i>     | 0.06821 | 0.01281 |
| OP087639 –GRW06 - <i>P. elongatum</i>                           | vs | AY733088 – PADOM11 – <i>P. elongatum</i>        | 0.00210 | 0.00215 |
| OP087637 - CYCYA01 - <i>Plasmodium</i> sp.                      | vs | AY733089 - ZEMAC01 - <i>Plasmodium</i> sp.      | 0.05670 | 0.01140 |
| OP087639 –GRW06 - <i>P. elongatum</i>                           | vs | JX467689 - DENPET03 - <i>P. nucleophilum</i>    | 0.07498 | 0.01046 |
| OP087637 - CYCYA01 - <i>Plasmodium</i> sp.                      | vs | JX467689 - DENPET03 - <i>P. nucleophilum</i>    | 0.07965 | 0.01371 |
| OP087639 –GRW06 - <i>P. elongatum</i>                           | vs | KY653762 - TURDUS1 – <i>P. circumflexum</i>     | 0.05885 | 0.01058 |

|                                            |    |                                                  |         |         |
|--------------------------------------------|----|--------------------------------------------------|---------|---------|
| OP087637 - CYCYA01 - <i>Plasmodium</i> sp. | vs | KY653762 - TURDUS1 - <i>P. circumflexum</i>      | 0.06811 | 0.01282 |
| OP087639 - GRW06 - <i>P. elongatum</i>     | vs | KY653775 - GRW02 - <i>P. ashfordi</i>            | 0.07268 | 0.01196 |
| OP087637 - CYCYA01 - <i>Plasmodium</i> sp. | vs | KY653775 - GRW02 - <i>P. ashfordi</i>            | 0.09151 | 0.01399 |
| OP087639 - GRW06 - <i>P. elongatum</i>     | vs | MT281527 - SW2 - <i>P. homonucleophilum</i>      | 0.10328 | 0.01797 |
| OP087637 - CYCYA01 - <i>Plasmodium</i> sp. | vs | MT281527 - SW2 - <i>P. homonucleophilum</i>      | 0.11080 | 0.01855 |
| OP087639 - GRW06 - <i>P. elongatum</i>     | vs | OP087637 - CYCYA01 - <i>Plasmodium</i> sp.       | 0.05895 | 0.01188 |
| OP087639 - GRW06 - <i>P. elongatum</i>     | vs | OP087640 - BUSTR03 - <i>Plasmodium</i> sp.       | 0.06113 | 0.01015 |
| OP087637 - CYCYA01 - <i>Plasmodium</i> sp. | vs | OP087640 - BUSTR03 - <i>Plasmodium</i> sp.       | 0.05441 | 0.01096 |
| OP087640 - BUSTR03 - <i>Plasmodium</i> sp. | vs | AB477128 - CXPIP10 - <i>Plasmodium</i> sp.       | 0.03221 | 0.00827 |
| OP087640 - BUSTR03 - <i>Plasmodium</i> sp. | vs | DQ241528 - BUTSTR01 - <i>Plasmodium</i> sp.      | 0.05214 | 0.00985 |
| OP087640 - BUSTR03 - <i>Plasmodium</i> sp. | vs | JQ988363 - COETOR01 - <i>Plasmodium</i> sp.      | 0.07726 | 0.01230 |
| OP087640 - BUSTR03 - <i>Plasmodium</i> sp. | vs | JX467689 - DENPET03 - <i>P. nucleophilum</i>     | 0.06803 | 0.01183 |
| OP087640 - BUSTR03 - <i>Plasmodium</i> sp. | vs | KJ575552 - SPMAG04 - <i>P. tejeraei</i>          | 0.04847 | 0.00951 |
| OP087640 - BUSTR03 - <i>Plasmodium</i> sp. | vs | KX159495 - MYCAME02 - <i>P. paranucleophilum</i> | 0.06572 | 0.01052 |
| OP087640 - BUSTR03 - <i>Plasmodium</i> sp. | vs | KY653754 - BUBSCA01 - <i>P. cathemerium</i>      | 0.04760 | 0.00939 |
| OP087640 - BUSTR03 - <i>Plasmodium</i> sp. | vs | KY653775 - GRW02 - <i>P. ashfordi</i>            | 0.07733 | 0.01165 |
| OP087640 - BUSTR03 - <i>Plasmodium</i> sp. | vs | KY653802 - GRW06 - <i>P. elongatum</i>           | 0.06113 | 0.01015 |
| OP087640 - BUSTR03 - <i>Plasmodium</i> sp. | vs | MK652235 - LINN1 - <i>P. matutinum</i>           | 0.05212 | 0.01125 |
| OP087640 - BUSTR03 - <i>Plasmodium</i> sp. | vs | NC008279 - GALLUS02 - <i>P. juxtannucleare</i>   | 0.07495 | 0.01555 |
| OP087640 - BUSTR03 - <i>Plasmodium</i> sp. | vs | OP087637 - CYCYA01 - <i>Plasmodium</i> sp.       | 0.05441 | 0.01096 |

#### Leucocytozoon

|                                           |    |                                               |         |         |
|-------------------------------------------|----|-----------------------------------------------|---------|---------|
| AB299369 - GALLUS08 - <i>L. sabrazei</i>  | vs | KF309189 - COHEL01 - <i>L. quynzae</i>        | 0.16967 | 0.02005 |
| AB299369 - GALLUS08 - <i>L. sabrazei</i>  | vs | KF479480 - HEAME01 - <i>L. quynzae</i>        | 0.17239 | 0.01986 |
| AB299369 - GALLUS08 - <i>L. sabrazei</i>  | vs | KY653765 - <i>L. fringillinarum</i>           | 0.18608 | 0.01852 |
| AB299369 - GALLUS08 - <i>L. sabrazei</i>  | vs | KY653795 - TUMER09 - <i>L. dubreuilii</i>     | 0.20428 | 0.02222 |
| AB299369 - GALLUS08 - <i>L. sabrazei</i>  | vs | MK103894 - PIPRIE02 - <i>L. neotropicalis</i> | 0.31067 | 0.02511 |
| AB299369 - GALLUS08 - <i>L. sabrazei</i>  | vs | MK103895 - GRSQU02 - <i>L. grallariae</i>     | 0.20732 | 0.02018 |
| AB299369 - GALLUS08 - <i>L. sabrazei</i>  | vs | OL598477 - BUBT2 - <i>L. buteonis</i>         | 0.19974 | 0.02179 |
| AB299369 - GALLUS08 - <i>L. sabrazei</i>  | vs | OL598497 - ACNI04 - <i>L. mathisi</i>         | 0.19494 | 0.01900 |
| AB302215 - GALLUS05 - <i>L. caulleryi</i> | vs | KF309189 - COHEL01 - <i>L. quynzae</i>        | 0.16448 | 0.02082 |
| AB302215 - GALLUS05 - <i>L. caulleryi</i> | vs | KF479480 - HEAME01 - <i>L. quynzae</i>        | 0.16712 | 0.02114 |
| AB302215 - GALLUS05 - <i>L. caulleryi</i> | vs | KY653765 - <i>L. fringillinarum</i>           | 0.17239 | 0.02261 |
| AB302215 - GALLUS05 - <i>L. caulleryi</i> | vs | KY653795 - TUMER09 - <i>L. dubreuilii</i>     | 0.20494 | 0.02256 |
| AB302215 - GALLUS05 - <i>L. caulleryi</i> | vs | MK103894 - PIPRIE02 - <i>L. neotropicalis</i> | 0.28699 | 0.02488 |
| AB302215 - GALLUS05 - <i>L. caulleryi</i> | vs | MK103895 - GRSQU02 - <i>L. grallariae</i>     | 0.20506 | 0.01630 |
| AB302215 - GALLUS05 - <i>L. caulleryi</i> | vs | OL598477 - BUBT2 - <i>L. buteonis</i>         | 0.18345 | 0.02188 |
| AB302215 - GALLUS05 - <i>L. caulleryi</i> | vs | OL598497 - ACNI04 - <i>L. mathisi</i>         | 0.16235 | 0.02144 |
| AB743872 - <i>Leucocytozoon</i> sp.       | vs | KF309189 - COHEL01 - <i>L. quynzae</i>        | 0.07976 | 0.01136 |
| AB743872 - <i>Leucocytozoon</i> sp.       | vs | KF479480 - HEAME01 - <i>L. quynzae</i>        | 0.08212 | 0.01179 |
| AB743872 - <i>Leucocytozoon</i> sp.       | vs | KY653765 - <i>L. fringillinarum</i>           | 0.07760 | 0.01151 |
| AB743872 - <i>Leucocytozoon</i> sp.       | vs | KY653795 - TUMER09 - <i>L. dubreuilii</i>     | 0.14053 | 0.01428 |
| AB743872 - <i>Leucocytozoon</i> sp.       | vs | MK103894 - PIPRIE02 - <i>L. neotropicalis</i> | 0.28851 | 0.02427 |
| AB743872 - <i>Leucocytozoon</i> sp.       | vs | MK103895 - GRSQU02 - <i>L. grallariae</i>     | 0.24398 | 0.02525 |
| AB743872 - <i>Leucocytozoon</i> sp.       | vs | OL598477 - BUBT2 - <i>L. buteonis</i>         | 0.22440 | 0.02585 |



|                                               |    |                                                |         |         |
|-----------------------------------------------|----|------------------------------------------------|---------|---------|
| AB743872 – <i>Leucocytozoon</i> sp.           | vs | OL598497 – ACNI04 – <i>L. mathisi</i>          | 0.18543 | 0.02412 |
| EF077166 – GAVIM01 – <i>Leucocytozoon</i> sp. | vs | MK947594 – EUBVER01 – <i>Leucocytozoon</i> sp. | 0.05026 | 0.00915 |
| EF077166 – GAVIM01 – <i>Leucocytozoon</i> sp. | vs | MK972900 – AULPRA03 – <i>Leucocytozoon</i> sp. | 0.04793 | 0.00901 |
| EF077166 – GAVIM01 – <i>Leucocytozoon</i> sp. | vs | MN458835 – SCY01 – <i>Leucocytozoon</i> sp.    | 0.05717 | 0.00939 |
| EF077166 – GAVIM01 – <i>Leucocytozoon</i> sp. | vs | MN458956 – HELVIO01 – <i>Leucocytozoon</i> sp. | 0.05054 | 0.00760 |
| EF607287 – CIAE02 – <i>Leucocytozoon</i> sp.  | vs | MK947594 – EUBVER01 – <i>Leucocytozoon</i> sp. | 0.03674 | 0.00800 |
| EF607287 – CIAE02 – <i>Leucocytozoon</i> sp.  | vs | MK972900 – AULPRA03 – <i>Leucocytozoon</i> sp. | 0.03893 | 0.00876 |
| EF607287 – CIAE02 – <i>Leucocytozoon</i> sp.  | vs | MN458835 – SCY01 – <i>Leucocytozoon</i> sp.    | 0.04577 | 0.00923 |
| EF607287 – CIAE02 – <i>Leucocytozoon</i> sp.  | vs | MN458956 – HELVIO01 – <i>Leucocytozoon</i> sp. | 0.03695 | 0.00703 |
| EU624137 – BUBO01 – <i>L. ziemanni</i>        | vs | KF309189 – COHEL01 – <i>L. quynzae</i>         | 0.07278 | 0.01193 |
| EU624137 – BUBO01 – <i>L. ziemanni</i>        | vs | KF479480 – HEAME01 – <i>L. quynzae</i>         | 0.07045 | 0.01169 |
| EU624137 – BUBO01 – <i>L. ziemanni</i>        | vs | KY653765 – <i>L. fringillinarum</i>            | 0.09657 | 0.01613 |
| EU624137 – BUBO01 – <i>L. ziemanni</i>        | vs | KY653795 – TUMER09 – <i>L. dubreuli</i>        | 0.16645 | 0.01844 |
| EU624137 – BUBO01 – <i>L. ziemanni</i>        | vs | MK103894 – PIPRIE02 – <i>L. neotropicalis</i>  | 0.30097 | 0.02439 |
| EU624137 – BUBO01 – <i>L. ziemanni</i>        | vs | MK103895 – GRSQU02 – <i>L. grallariae</i>      | 0.25909 | 0.02585 |
| EU624137 – BUBO01 – <i>L. ziemanni</i>        | vs | OL598477 – BUBT2 – <i>L. buteonis</i>          | 0.22734 | 0.02684 |
| EU624137 – BUBO01 – <i>L. ziemanni</i>        | vs | OL598497 – ACNI04 – <i>L. mathisi</i>          | 0.21870 | 0.02660 |
| KF309189 – COHEL01 – <i>L. quynzae</i>        | vs | KR422359 – FASPA02 – <i>L. californicus</i>    | 0.06131 | 0.01039 |
| KF309189 – COHEL01 – <i>L. quynzae</i>        | vs | KY653765 – <i>L. fringillinarum</i>            | 0.08680 | 0.01322 |
| KF309189 – COHEL01 – <i>L. quynzae</i>        | vs | KY653781 – BUBO01 – <i>L. danilewskyi</i>      | 0.14601 | 0.01715 |
| KF309189 – COHEL01 – <i>L. quynzae</i>        | vs | KY653795 – TUMER09 – <i>L. dubreuli</i>        | 0.14566 | 0.01824 |
| KF309189 – COHEL01 – <i>L. quynzae</i>        | vs | MK103894 – PIPRIE02 – <i>L. neotropicalis</i>  | 0.29174 | 0.02368 |
| KF309189 – COHEL01 – <i>L. quynzae</i>        | vs | MK103895 – GRSQU02 – <i>L. grallariae</i>      | 0.21245 | 0.02341 |
| KF309189 – COHEL01 – <i>L. quynzae</i>        | vs | MK216226 – COLAUR01 – <i>L. polynuclearis</i>  | 0.06138 | 0.01217 |
| KF309189 – COHEL01 – <i>L. quynzae</i>        | vs | MK947515 – BUVIR04 – <i>Leucocytozoon</i> sp.  | 0.07278 | 0.01174 |
| KF309189 – COHEL01 – <i>L. quynzae</i>        | vs | MK947594 – EUBVER01 – <i>Leucocytozoon</i> sp. | 0.05908 | 0.00951 |
| KF309189 – COHEL01 – <i>L. quynzae</i>        | vs | MK972900 – AULPRA03 – <i>Leucocytozoon</i> sp. | 0.06134 | 0.01016 |
| KF309189 – COHEL01 – <i>L. quynzae</i>        | vs | MW626894 – COLAUR01 – <i>L. polynuclearis</i>  | 0.05912 | 0.01214 |
| KF309189 – COHEL01 – <i>L. quynzae</i>        | vs | OK086053 – CARCRI01 – <i>Leucocytozoon</i> sp. | 0.07278 | 0.01090 |
| KF479480 – HEAME01 – <i>L. quynzae</i>        | vs | KR422359 – FASPA02 – <i>L. californicus</i>    | 0.06361 | 0.01045 |
| KF479480 – HEAME01 – <i>L. quynzae</i>        | vs | KY653765 – <i>L. fringillinarum</i>            | 0.08443 | 0.01292 |
| KF479480 – HEAME01 – <i>L. quynzae</i>        | vs | KY653781 – BUBO01 – <i>L. danilewskyi</i>      | 0.14340 | 0.01670 |
| KF479480 – HEAME01 – <i>L. quynzae</i>        | vs | KY653795 – TUMER09 – <i>L. dubreuli</i>        | 0.14310 | 0.01798 |
| KF479480 – HEAME01 – <i>L. quynzae</i>        | vs | MK103894 – PIPRIE02 – <i>L. neotropicalis</i>  | 0.29480 | 0.02364 |
| KF479480 – HEAME01 – <i>L. quynzae</i>        | vs | MK103895 – GRSQU02 – <i>L. grallariae</i>      | 0.21529 | 0.02330 |
| KF479480 – HEAME01 – <i>L. quynzae</i>        | vs | MK216226 – COLAUR01 – <i>L. polynuclearis</i>  | 0.06370 | 0.01258 |
| KF479480 – HEAME01 – <i>L. quynzae</i>        | vs | MK947515 – BUVIR04 – <i>Leucocytozoon</i> sp.  | 0.07045 | 0.01153 |
| KF479480 – HEAME01 – <i>L. quynzae</i>        | vs | MK947594 – EUBVER01 – <i>Leucocytozoon</i> sp. | 0.06138 | 0.00972 |
| KF479480 – HEAME01 – <i>L. quynzae</i>        | vs | MK972900 – AULPRA03 – <i>Leucocytozoon</i> sp. | 0.06365 | 0.01036 |
| KF479480 – HEAME01 – <i>L. quynzae</i>        | vs | MW626894 – COLAUR01 – <i>L. polynuclearis</i>  | 0.06143 | 0.01248 |
| KF479480 – HEAME01 – <i>L. quynzae</i>        | vs | OK086053 – CARCRI01 – <i>Leucocytozoon</i> sp. | 0.07512 | 0.01109 |
| KR422359 – FASPA02 – <i>L. californicus</i>   | vs | MK947594 – EUBVER01 – <i>Leucocytozoon</i> sp. | 0.03893 | 0.00831 |
| KR422359 – FASPA02 – <i>L. californicus</i>   | vs | MK972900 – AULPRA03 – <i>Leucocytozoon</i> sp. | 0.04114 | 0.00841 |
| KR422359 – FASPA02 – <i>L. californicus</i>   | vs | MN458835 – SCY01 – <i>Leucocytozoon</i> sp.    | 0.04798 | 0.00926 |

|                                               |    |                                                |         |         |
|-----------------------------------------------|----|------------------------------------------------|---------|---------|
| KR422359 - FASPA02- <i>L. californicus</i>    | vs | MN458956 - HELVIO01 - <i>Leucocytozoon</i> sp. | 0.03915 | 0.00759 |
| MK216226 - COLAUR01 - <i>L. polynuclearis</i> | vs | MK947594 - EUBVER01 - <i>Leucocytozoon</i> sp. | 0.03670 | 0.00918 |
| MK216226 - COLAUR01 - <i>L. polynuclearis</i> | vs | MK972900 - AULPRA03 - <i>Leucocytozoon</i> sp. | 0.03889 | 0.00875 |
| MK216226 - COLAUR01 - <i>L. polynuclearis</i> | vs | MN458835 - SCY01 - <i>Leucocytozoon</i> sp.    | 0.04118 | 0.00863 |
| MK216226 - COLAUR01 - <i>L. polynuclearis</i> | vs | MN458956 - HELVIO01 - <i>Leucocytozoon</i> sp. | 0.03690 | 0.00693 |
| MK330155 - BUTBUT03 - <i>L. toddi</i>         | vs | KF309189 - COHEL01 - <i>L. quynzae</i>         | 0.19916 | 0.02632 |
| MK330155 - BUTBUT03 - <i>L. toddi</i>         | vs | KF479480 - HEAME01 - <i>L. quynzae</i>         | 0.19635 | 0.02576 |
| MK330155 - BUTBUT03 - <i>L. toddi</i>         | vs | KY653765 - <i>L. fringillinarum</i>            | 0.20165 | 0.02487 |
| MK330155 - BUTBUT03 - <i>L. toddi</i>         | vs | KY653795 - TUMER09 - <i>L. dubreuil</i>        | 0.23862 | 0.02863 |
| MK330155 - BUTBUT03 - <i>L. toddi</i>         | vs | MK103894 - PIPRIE02 - <i>L. neotropialis</i>   | 0.33119 | 0.03007 |
| MK330155 - BUTBUT03 - <i>L. toddi</i>         | vs | MK103895 - GRSQU02 - <i>L. grallariae</i>      | 0.23708 | 0.02379 |
| MK330155 - BUTBUT03 - <i>L. toddi</i>         | vs | OL598477 - BUBT2 - <i>L. buteonis</i>          | 0.03442 | 0.00838 |
| MK330155 - BUTBUT03 - <i>L. toddi</i>         | vs | OL598477 - BUBT2 - <i>L. buteonis</i>          | 0.12866 | 0.01670 |
| MK330155 - BUTBUT03 - <i>L. toddi</i>         | vs | OL598497 - ACNI04 - <i>L. mathisi</i>          | 0.07800 | 0.01351 |
| MK330155 - BUTBUT03 - <i>L. toddi</i>         | vs | OL598497 - ACNI04 - <i>L. mathisi</i>          | 0.11355 | 0.01524 |
| MW043725 - GALLUS06 - <i>L. schoutedeni</i>   | vs | OL598477 - BUBT2 - <i>L. buteonis</i>          | 0.19761 | 0.02781 |
| MW043725 - GALLUS06 - <i>L. schoutedeni</i>   | vs | OL598497 - ACNI04 - <i>L. mathisi</i>          | 0.18303 | 0.02213 |
| OL598497 - BUBT2 - <i>L. buteonis</i>         | vs | OL598497 - ACNI04 - <i>L. mathisi</i>          | 0.09178 | 0.01457 |

---

Table S5. Estimates of evolutionary divergence between haemosporidian parasites mtDNA genome sequences (5234 bp excluding gaps). The alignment included sequences from the Genbank of the three genera (*Leucocytozoon*, *Haemoproteus*, and *Plasmodium*) and the new mtDNA genomes sequences (N=5) obtained in this study for some well-identified parasite species using morphology (in bold and yellow). The number of base substitutions per site between sequences are shown in black, and the standard error estimate(s) are above the diagonal in blue. Analyses were conducted using the Kimura 2-parameter model. The rate variation among sites was modeled with a gamma distribution (shape parameter = 4). The analysis involved 70 nucleotide sequences. Codon positions included were 1st+2nd+3rd. All positions containing gaps and missing data were eliminated. Evolutionary analyses were conducted in MEGA7 [34].

| Parasite Species (NCBI/MalAvi)                        | 1     | 2     | 3     | 4     | 5     |
|-------------------------------------------------------|-------|-------|-------|-------|-------|
| 1 <i>Leucocytozoon sabraezesi</i> (AB299369/GALLUSo8) |       | 0,010 | 0,010 | 0,009 | 0,009 |
| 2 <i>L. majoris</i> (FJ168563/ZOLEUo2)                | 0,212 |       | 0,006 | 0,004 | 0,010 |
| 3 <i>L. fringillinarum</i> (FJ168564/CB1)             | 0,219 | 0,094 |       | 0,006 | 0,010 |
| 4 <i>L. quynzae</i> (KF479480/HEAMEo1)                | 0,199 | 0,057 | 0,089 |       | 0,010 |
| 5 <i>Leucocytozoon</i> sp. (KM610046/GRARUFo1)        | 0,201 | 0,217 | 0,212 | 0,204 |       |
| 6 <i>Leucocytozoon</i> sp. (KM610045/GRAQUIo1)        | 0,202 | 0,225 | 0,223 | 0,212 | 0,127 |
| 7 <i>Leucocytozoon</i> sp. (KT162002/TFUS14)          | 0,233 | 0,109 | 0,135 | 0,095 | 0,229 |
| 8 <i>L. fringillinarum</i> (KT162004/TFUS15)          | 0,230 | 0,161 | 0,130 | 0,153 | 0,239 |
| 9 <i>Leucocytozoon</i> sp. (KT162003/TFUS12)          | 0,219 | 0,096 | 0,027 | 0,087 | 0,212 |
| 10 <i>L. danilewski</i> (KY653781/Ho1.14D)            | 0,262 | 0,193 | 0,182 | 0,170 | 0,261 |
| 11 <i>L. dubreuilii</i> (KY653795/TUMERo9)            | 0,222 | 0,154 | 0,129 | 0,146 | 0,238 |
| 12 <i>L. fringillinarum</i> (KY653765/TRPIP2)         | 0,219 | 0,093 | 0,007 | 0,086 | 0,212 |
| 13 <i>H. columbae</i> (KY653761/COLIVo7)              | 0,247 | 0,251 | 0,244 | 0,238 | 0,240 |
| 14 <i>H. jenniae</i> (KY653758/CREFURo1)              | 0,214 | 0,216 | 0,211 | 0,203 | 0,214 |
| 15 <i>H. iwa</i> (KY653777/FREMINo1)                  | 0,215 | 0,218 | 0,212 | 0,205 | 0,214 |
| 16 <i>H. multipigmentatus</i> (KY653756/ZEGALo5)      | 0,230 | 0,236 | 0,233 | 0,222 | 0,221 |
| 17 <i>Haemoproteus</i> sp. (AY733086/MELLEWo1)        | 0,216 | 0,216 | 0,211 | 0,213 | 0,200 |
| 18 <i>Haemoproteus</i> sp. (AY733087/LICFREo2)        | 0,209 | 0,217 | 0,213 | 0,213 | 0,204 |
| 19 <i>H. macrovacuolatus</i> (KJ499987/DENAUTo1)      | 0,217 | 0,210 | 0,216 | 0,207 | 0,204 |
| 20 <i>Haemoproteus</i> sp. (KY653812/ML84oA)          | 0,216 | 0,210 | 0,211 | 0,209 | 0,202 |
| 21 <i>H. sacharovi</i> (KY653811/ZEMAC17)             | 0,213 | 0,207 | 0,208 | 0,206 | 0,199 |
| 22 <i>Haemoproteus</i> sp. (KY653798/COLVIRo1)        | 0,224 | 0,214 | 0,216 | 0,211 | 0,203 |
| 23 <i>H. witii</i> (KY653794/TROAED2o)                | 0,203 | 0,202 | 0,199 | 0,196 | 0,198 |
| 24 <i>Haemoproteus</i> sp. (KY653805/DIGCAEo1)        | 0,213 | 0,213 | 0,210 | 0,202 | 0,204 |
| 25 <i>Haemoproteus</i> sp. (KY653767/FALPERo1)        | 0,207 | 0,209 | 0,206 | 0,201 | 0,199 |
| 26 <i>Haemoproteus</i> sp. (KY653803/VIOLIo5)         | 0,219 | 0,221 | 0,215 | 0,212 | 0,210 |
| 27 <i>H. coatneyi</i> (KY653752/TANIGo1)              | 0,216 | 0,211 | 0,206 | 0,201 | 0,199 |
| 28 <i>H. erythrogravidus</i> (KY653797/ZOCAP14)       | 0,213 | 0,212 | 0,208 | 0,201 | 0,200 |
| 29 <i>H. coatneyi</i> (KT698210/ARBRUo2)              | 0,218 | 0,218 | 0,215 | 0,211 | 0,205 |
| 30 <i>H. noctuae</i> (KY653757/CIRCUMo1)              | 0,210 | 0,207 | 0,207 | 0,205 | 0,201 |
| 31 <i>H. minutus</i> (KY653763/TURDUS2)               | 0,205 | 0,204 | 0,196 | 0,196 | 0,196 |

|    |                                                    |       |       |       |       |       |
|----|----------------------------------------------------|-------|-------|-------|-------|-------|
| 32 | <i>H. balmorali</i> (KY653799/ROBIN1)              | 0,219 | 0,219 | 0,218 | 0,214 | 0,212 |
| 33 | <i>H. lanii</i> (KY653787/RB1)                     | 0,219 | 0,215 | 0,208 | 0,206 | 0,204 |
| 34 | <i>H. belopolski</i> (KY653790/HIICT1)             | 0,218 | 0,215 | 0,211 | 0,211 | 0,212 |
| 35 | <i>H. pastoris</i> (KY653793/LAMPUR01)             | 0,206 | 0,209 | 0,204 | 0,199 | 0,197 |
| 36 | <i>H. tartakovskyi</i> (KY653807/SISKIN1)          | 0,211 | 0,210 | 0,201 | 0,197 | 0,199 |
| 37 | <i>H. motacillae</i> (KY653768/YWT3)               | 0,214 | 0,212 | 0,209 | 0,203 | 0,204 |
| 38 | <i>L. (Akita) caulleryi</i> (AB302215/GALLUS05)    | 0,210 | 0,205 | 0,210 | 0,196 | 0,199 |
| 39 | <i>P. gallinaceum</i> (AB250690/GALLUS01)          | 0,213 | 0,206 | 0,211 | 0,201 | 0,207 |
| 40 | <i>P. juxtannucleare</i> (NC_008279/GALLUS02)      | 0,226 | 0,218 | 0,222 | 0,213 | 0,215 |
| 41 | <i>P. relictum</i> (AY733090/GRW04)                | 0,218 | 0,212 | 0,214 | 0,205 | 0,207 |
| 42 | <i>Plasmodium</i> sp. (AY733089/ZEMAC01)           | 0,218 | 0,213 | 0,219 | 0,200 | 0,207 |
| 43 | <i>P. elongatum</i> (AY733088/PADOM11)             | 0,220 | 0,211 | 0,213 | 0,203 | 0,207 |
| 44 | <i>Plasmodium</i> sp. (KY653786/SPDEM02)           | 0,222 | 0,220 | 0,216 | 0,212 | 0,212 |
| 45 | <i>P. relictum</i> (KY653774/SGS1)                 | 0,221 | 0,210 | 0,212 | 0,205 | 0,207 |
| 46 | <i>Plasmodium</i> sp. (KY653754/BUBSCA01)          | 0,226 | 0,216 | 0,222 | 0,207 | 0,212 |
| 47 | <i>Plasmodium</i> sp. (KY653750/MYCAME02)          | 0,219 | 0,227 | 0,221 | 0,214 | 0,210 |
| 48 | <i>Plasmodium</i> sp. (KY653749/OH2A)              | 0,213 | 0,211 | 0,213 | 0,199 | 0,209 |
| 49 | <i>P. lutzi</i> (KY653815/CATUST05)                | 0,220 | 0,214 | 0,219 | 0,202 | 0,208 |
| 50 | <i>Plasmodium</i> sp. (KY653766/SISKIN3)           | 0,229 | 0,216 | 0,221 | 0,209 | 0,213 |
| 51 | <i>Plasmodium</i> sp. (KY653785/QUIMEX01)          | 0,228 | 0,217 | 0,225 | 0,207 | 0,214 |
| 52 | <i>Plasmodium</i> sp. (KY653769/VIOLO3)            | 0,217 | 0,212 | 0,217 | 0,202 | 0,214 |
| 53 | <i>Plasmodium</i> sp. (KY653789/VIOLO7)            | 0,220 | 0,226 | 0,217 | 0,216 | 0,212 |
| 54 | <i>Plasmodium</i> sp. (KY653806/TROPER02)          | 0,215 | 0,211 | 0,215 | 0,198 | 0,207 |
| 55 | <i>Plasmodium</i> sp. (KY653771/LAIRLO1)           | 0,223 | 0,224 | 0,216 | 0,218 | 0,209 |
| 56 | <i>P. homopolare</i> (KY653770/BAEBIC02)           | 0,220 | 0,224 | 0,219 | 0,220 | 0,210 |
| 57 | <i>P. unalis</i> (KY653814/TFUS06)                 | 0,223 | 0,229 | 0,225 | 0,220 | 0,209 |
| 58 | <i>Plasmodium</i> sp. (KY653804/CATUST06)          | 0,228 | 0,217 | 0,220 | 0,216 | 0,211 |
| 59 | <i>P. vaughani</i> (KY653792/SYAT05)               | 0,230 | 0,231 | 0,230 | 0,220 | 0,211 |
| 60 | <i>P. ashfordi</i> (KY653775/GRW02)                | 0,221 | 0,230 | 0,218 | 0,217 | 0,214 |
| 61 | <i>P. relictum</i> (KY653772/GRW11)                | 0,219 | 0,209 | 0,211 | 0,205 | 0,206 |
| 62 | <i>P. homocircumflexum</i> (KY653784/COLL4)        | 0,225 | 0,216 | 0,214 | 0,208 | 0,210 |
| 63 | <i>P. circumflexum</i> (KY653762/TURDUS1)          | 0,212 | 0,203 | 0,205 | 0,197 | 0,204 |
| 64 | <i>P. elongatum</i> (KY653801/GRW06)               | 0,221 | 0,214 | 0,215 | 0,205 | 0,210 |
| 65 | <i>Plasmodium</i> sp. (KY653780/WW15)              | 0,223 | 0,212 | 0,219 | 0,209 | 0,214 |
| 66 | <i>H. gabaldoni</i> (OP701681/CAIMOS01)            | 0,220 | 0,214 | 0,216 | 0,208 | 0,204 |
| 67 | <i>H. gabaldoni</i> (OP701682/CAIMOS01)            | 0,219 | 0,214 | 0,215 | 0,208 | 0,202 |
| 68 | <i>H. caprimulgi</i> (OP701683/CHOACU01)           | 0,213 | 0,204 | 0,209 | 0,202 | 0,196 |
| 69 | <i>P. tejerai</i> (OP701684/SPMAG04)               | 0,215 | 0,211 | 0,213 | 0,203 | 0,213 |
| 70 | <i>H. paramultipigmentatus</i> (OP701685/COLBUC01) | 0,221 | 0,223 | 0,219 | 0,207 | 0,214 |

| 6     | 7     | 8     | 9     | 10    | 11    | 12    | 13    | 14    | 15    | 16    | 17    | 18    | 19    |
|-------|-------|-------|-------|-------|-------|-------|-------|-------|-------|-------|-------|-------|-------|
| 0,010 | 0,010 | 0,009 | 0,010 | 0,010 | 0,010 | 0,010 | 0,010 | 0,009 | 0,009 | 0,010 | 0,010 | 0,009 | 0,010 |
| 0,010 | 0,006 | 0,007 | 0,007 | 0,009 | 0,007 | 0,006 | 0,009 | 0,009 | 0,009 | 0,009 | 0,009 | 0,009 | 0,009 |
| 0,010 | 0,008 | 0,006 | 0,003 | 0,008 | 0,007 | 0,001 | 0,009 | 0,009 | 0,010 | 0,009 | 0,009 | 0,009 | 0,009 |
| 0,010 | 0,006 | 0,007 | 0,006 | 0,008 | 0,006 | 0,006 | 0,009 | 0,009 | 0,009 | 0,008 | 0,009 | 0,009 | 0,009 |
| 0,007 | 0,010 | 0,010 | 0,011 | 0,011 | 0,011 | 0,010 | 0,012 | 0,011 | 0,011 | 0,011 | 0,008 | 0,008 | 0,008 |
|       | 0,010 | 0,010 | 0,010 | 0,011 | 0,010 | 0,009 | 0,011 | 0,010 | 0,010 | 0,010 | 0,009 | 0,009 | 0,009 |
| 0,242 |       | 0,008 | 0,008 | 0,009 | 0,008 | 0,008 | 0,010 | 0,010 | 0,010 | 0,009 | 0,009 | 0,009 | 0,009 |
| 0,258 | 0,171 |       | 0,006 | 0,010 | 0,005 | 0,006 | 0,009 | 0,009 | 0,009 | 0,010 | 0,009 | 0,010 | 0,010 |
| 0,225 | 0,133 | 0,132 |       | 0,008 | 0,007 | 0,003 | 0,009 | 0,010 | 0,010 | 0,010 | 0,009 | 0,009 | 0,009 |
| 0,259 | 0,207 | 0,223 | 0,180 |       | 0,009 | 0,008 | 0,011 | 0,011 | 0,011 | 0,011 | 0,010 | 0,010 | 0,010 |
| 0,252 | 0,168 | 0,074 | 0,127 | 0,217 |       | 0,007 | 0,010 | 0,010 | 0,010 | 0,010 | 0,009 | 0,010 | 0,010 |
| 0,223 | 0,135 | 0,130 | 0,024 | 0,180 | 0,129 |       | 0,009 | 0,009 | 0,010 | 0,009 | 0,010 | 0,009 | 0,009 |
| 0,252 | 0,254 | 0,262 | 0,249 | 0,281 | 0,262 | 0,244 |       | 0,006 | 0,006 | 0,005 | 0,008 | 0,008 | 0,008 |
| 0,219 | 0,228 | 0,233 | 0,214 | 0,251 | 0,234 | 0,213 | 0,108 |       | 0,002 | 0,005 | 0,007 | 0,006 | 0,006 |
| 0,218 | 0,229 | 0,235 | 0,214 | 0,253 | 0,237 | 0,214 | 0,110 | 0,008 |       | 0,005 | 0,007 | 0,007 | 0,007 |
| 0,226 | 0,245 | 0,252 | 0,239 | 0,271 | 0,249 | 0,234 | 0,065 | 0,085 | 0,086 |       | 0,007 | 0,007 | 0,007 |
| 0,217 | 0,232 | 0,241 | 0,214 | 0,258 | 0,242 | 0,214 | 0,167 | 0,127 | 0,128 | 0,152 |       | 0,002 | 0,006 |
| 0,219 | 0,235 | 0,241 | 0,215 | 0,257 | 0,242 | 0,216 | 0,169 | 0,125 | 0,126 | 0,151 | 0,017 |       | 0,006 |
| 0,215 | 0,227 | 0,238 | 0,217 | 0,253 | 0,244 | 0,213 | 0,168 | 0,129 | 0,130 | 0,149 | 0,090 | 0,092 |       |
| 0,209 | 0,226 | 0,235 | 0,213 | 0,254 | 0,238 | 0,211 | 0,170 | 0,126 | 0,128 | 0,151 | 0,081 | 0,079 | 0,039 |
| 0,206 | 0,223 | 0,231 | 0,210 | 0,251 | 0,236 | 0,208 | 0,166 | 0,122 | 0,125 | 0,148 | 0,078 | 0,077 | 0,036 |
| 0,210 | 0,232 | 0,237 | 0,218 | 0,258 | 0,239 | 0,214 | 0,170 | 0,128 | 0,129 | 0,149 | 0,083 | 0,084 | 0,041 |
| 0,207 | 0,216 | 0,231 | 0,204 | 0,244 | 0,230 | 0,203 | 0,162 | 0,120 | 0,121 | 0,147 | 0,064 | 0,063 | 0,083 |
| 0,218 | 0,227 | 0,237 | 0,214 | 0,247 | 0,240 | 0,212 | 0,165 | 0,124 | 0,123 | 0,146 | 0,062 | 0,062 | 0,090 |
| 0,213 | 0,220 | 0,230 | 0,210 | 0,243 | 0,230 | 0,209 | 0,165 | 0,120 | 0,122 | 0,147 | 0,051 | 0,051 | 0,085 |
| 0,223 | 0,231 | 0,241 | 0,217 | 0,257 | 0,248 | 0,216 | 0,173 | 0,130 | 0,130 | 0,154 | 0,070 | 0,070 | 0,090 |
| 0,215 | 0,229 | 0,232 | 0,209 | 0,251 | 0,239 | 0,209 | 0,158 | 0,121 | 0,122 | 0,141 | 0,063 | 0,061 | 0,089 |
| 0,216 | 0,228 | 0,233 | 0,212 | 0,246 | 0,239 | 0,210 | 0,161 | 0,122 | 0,122 | 0,142 | 0,059 | 0,060 | 0,086 |
| 0,221 | 0,236 | 0,241 | 0,219 | 0,255 | 0,245 | 0,217 | 0,168 | 0,129 | 0,128 | 0,147 | 0,065 | 0,064 | 0,092 |
| 0,206 | 0,220 | 0,230 | 0,211 | 0,250 | 0,234 | 0,206 | 0,171 | 0,127 | 0,128 | 0,151 | 0,081 | 0,081 | 0,037 |
| 0,209 | 0,218 | 0,225 | 0,200 | 0,243 | 0,227 | 0,198 | 0,159 | 0,118 | 0,119 | 0,139 | 0,057 | 0,054 | 0,075 |
| 0,223 | 0,235 | 0,249 | 0,223 | 0,264 | 0,252 | 0,220 | 0,177 | 0,131 | 0,133 | 0,152 | 0,061 | 0,060 | 0,098 |
| 0,220 | 0,222 | 0,236 | 0,213 | 0,263 | 0,239 | 0,212 | 0,162 | 0,126 | 0,126 | 0,144 | 0,071 | 0,070 | 0,101 |
| 0,224 | 0,226 | 0,235 | 0,213 | 0,261 | 0,237 | 0,213 | 0,163 | 0,122 | 0,121 | 0,141 | 0,071 | 0,068 | 0,097 |
| 0,213 | 0,220 | 0,233 | 0,207 | 0,248 | 0,232 | 0,207 | 0,165 | 0,116 | 0,115 | 0,142 | 0,043 | 0,043 | 0,074 |
| 0,211 | 0,224 | 0,228 | 0,205 | 0,246 | 0,236 | 0,205 | 0,159 | 0,120 | 0,121 | 0,138 | 0,056 | 0,058 | 0,083 |
| 0,217 | 0,226 | 0,237 | 0,215 | 0,254 | 0,239 | 0,212 | 0,161 | 0,123 | 0,123 | 0,142 | 0,055 | 0,057 | 0,087 |
| 0,205 | 0,213 | 0,234 | 0,208 | 0,241 | 0,233 | 0,210 | 0,167 | 0,122 | 0,123 | 0,150 | 0,112 | 0,113 | 0,120 |
| 0,215 | 0,217 | 0,232 | 0,211 | 0,250 | 0,235 | 0,212 | 0,168 | 0,128 | 0,130 | 0,152 | 0,113 | 0,112 | 0,126 |

|              |              |              |              |              |              |              |              |              |              |              |              |              |              |
|--------------|--------------|--------------|--------------|--------------|--------------|--------------|--------------|--------------|--------------|--------------|--------------|--------------|--------------|
| 0,214        | 0,236        | 0,237        | 0,220        | 0,266        | 0,238        | 0,220        | 0,170        | 0,135        | 0,139        | 0,158        | 0,126        | 0,126        | 0,142        |
| 0,212        | 0,218        | 0,235        | 0,215        | 0,254        | 0,237        | 0,215        | 0,165        | 0,123        | 0,124        | 0,148        | 0,111        | 0,108        | 0,123        |
| 0,218        | 0,219        | 0,245        | 0,220        | 0,261        | 0,241        | 0,219        | 0,176        | 0,130        | 0,132        | 0,153        | 0,114        | 0,113        | 0,128        |
| 0,210        | 0,216        | 0,235        | 0,216        | 0,257        | 0,236        | 0,213        | 0,171        | 0,128        | 0,130        | 0,148        | 0,119        | 0,118        | 0,125        |
| 0,218        | 0,232        | 0,240        | 0,219        | 0,260        | 0,238        | 0,215        | 0,171        | 0,131        | 0,133        | 0,159        | 0,125        | 0,128        | 0,133        |
| 0,212        | 0,219        | 0,237        | 0,215        | 0,256        | 0,240        | 0,213        | 0,166        | 0,127        | 0,128        | 0,153        | 0,114        | 0,112        | 0,123        |
| 0,221        | 0,225        | 0,241        | 0,223        | 0,255        | 0,241        | 0,221        | 0,171        | 0,130        | 0,130        | 0,154        | 0,123        | 0,120        | 0,128        |
| 0,221        | 0,227        | 0,235        | 0,225        | 0,262        | 0,243        | 0,220        | 0,178        | 0,145        | 0,146        | 0,162        | 0,134        | 0,133        | 0,139        |
| 0,216        | 0,216        | 0,240        | 0,217        | 0,251        | 0,240        | 0,214        | 0,169        | 0,122        | 0,124        | 0,149        | 0,112        | 0,113        | 0,131        |
| 0,215        | 0,216        | 0,243        | 0,221        | 0,257        | 0,242        | 0,218        | 0,173        | 0,128        | 0,130        | 0,154        | 0,119        | 0,118        | 0,130        |
| 0,224        | 0,226        | 0,236        | 0,218        | 0,261        | 0,244        | 0,221        | 0,177        | 0,133        | 0,136        | 0,158        | 0,122        | 0,120        | 0,130        |
| 0,222        | 0,220        | 0,247        | 0,226        | 0,260        | 0,244        | 0,225        | 0,180        | 0,135        | 0,137        | 0,160        | 0,123        | 0,121        | 0,136        |
| 0,215        | 0,214        | 0,238        | 0,222        | 0,253        | 0,242        | 0,217        | 0,165        | 0,127        | 0,129        | 0,149        | 0,121        | 0,121        | 0,132        |
| 0,225        | 0,227        | 0,240        | 0,222        | 0,260        | 0,241        | 0,217        | 0,176        | 0,143        | 0,145        | 0,157        | 0,137        | 0,136        | 0,136        |
| 0,217        | 0,211        | 0,243        | 0,221        | 0,252        | 0,235        | 0,215        | 0,176        | 0,133        | 0,136        | 0,157        | 0,117        | 0,118        | 0,131        |
| 0,217        | 0,232        | 0,238        | 0,219        | 0,263        | 0,238        | 0,217        | 0,169        | 0,136        | 0,140        | 0,155        | 0,120        | 0,121        | 0,136        |
| 0,217        | 0,234        | 0,238        | 0,221        | 0,268        | 0,241        | 0,218        | 0,170        | 0,135        | 0,138        | 0,156        | 0,121        | 0,122        | 0,136        |
| 0,224        | 0,227        | 0,234        | 0,225        | 0,268        | 0,231        | 0,224        | 0,168        | 0,142        | 0,145        | 0,159        | 0,127        | 0,129        | 0,141        |
| 0,226        | 0,225        | 0,235        | 0,223        | 0,268        | 0,235        | 0,220        | 0,174        | 0,138        | 0,142        | 0,161        | 0,130        | 0,134        | 0,144        |
| 0,225        | 0,231        | 0,237        | 0,230        | 0,270        | 0,235        | 0,231        | 0,171        | 0,138        | 0,141        | 0,158        | 0,132        | 0,132        | 0,144        |
| 0,229        | 0,230        | 0,238        | 0,220        | 0,270        | 0,243        | 0,219        | 0,184        | 0,150        | 0,149        | 0,165        | 0,140        | 0,140        | 0,147        |
| 0,212        | 0,218        | 0,235        | 0,214        | 0,256        | 0,239        | 0,212        | 0,165        | 0,126        | 0,128        | 0,152        | 0,113        | 0,111        | 0,123        |
| 0,219        | 0,225        | 0,242        | 0,218        | 0,262        | 0,243        | 0,217        | 0,177        | 0,131        | 0,132        | 0,154        | 0,119        | 0,118        | 0,126        |
| 0,209        | 0,214        | 0,231        | 0,207        | 0,248        | 0,231        | 0,206        | 0,164        | 0,122        | 0,123        | 0,145        | 0,110        | 0,108        | 0,120        |
| 0,212        | 0,219        | 0,237        | 0,221        | 0,260        | 0,239        | 0,215        | 0,174        | 0,133        | 0,135        | 0,152        | 0,124        | 0,122        | 0,129        |
| 0,226        | 0,227        | 0,240        | 0,224        | 0,262        | 0,241        | 0,220        | 0,171        | 0,127        | 0,127        | 0,155        | 0,116        | 0,118        | 0,129        |
| <b>0,214</b> | <b>0,230</b> | <b>0,239</b> | <b>0,216</b> | <b>0,253</b> | <b>0,243</b> | <b>0,213</b> | <b>0,167</b> | <b>0,129</b> | <b>0,129</b> | <b>0,148</b> | <b>0,089</b> | <b>0,091</b> | <b>0,008</b> |
| <b>0,213</b> | <b>0,229</b> | <b>0,239</b> | <b>0,216</b> | <b>0,251</b> | <b>0,243</b> | <b>0,212</b> | <b>0,167</b> | <b>0,129</b> | <b>0,130</b> | <b>0,148</b> | <b>0,089</b> | <b>0,090</b> | <b>0,008</b> |
| <b>0,202</b> | <b>0,217</b> | <b>0,225</b> | <b>0,213</b> | <b>0,248</b> | <b>0,232</b> | <b>0,208</b> | <b>0,168</b> | <b>0,124</b> | <b>0,125</b> | <b>0,147</b> | <b>0,084</b> | <b>0,083</b> | <b>0,038</b> |
| <b>0,216</b> | <b>0,215</b> | <b>0,241</b> | <b>0,215</b> | <b>0,253</b> | <b>0,242</b> | <b>0,213</b> | <b>0,169</b> | <b>0,124</b> | <b>0,126</b> | <b>0,152</b> | <b>0,112</b> | <b>0,112</b> | <b>0,128</b> |
| <b>0,223</b> | <b>0,232</b> | <b>0,237</b> | <b>0,222</b> | <b>0,257</b> | <b>0,241</b> | <b>0,221</b> | <b>0,094</b> | <b>0,050</b> | <b>0,052</b> | <b>0,070</b> | <b>0,132</b> | <b>0,134</b> | <b>0,135</b> |

| 20    | 21    | 22    | 23    | 24    | 25    | 26    | 27    | 28    | 29    | 30    | 31    | 32    | 33    |
|-------|-------|-------|-------|-------|-------|-------|-------|-------|-------|-------|-------|-------|-------|
| 0,009 | 0,009 | 0,010 | 0,009 | 0,010 | 0,009 | 0,009 | 0,010 | 0,010 | 0,010 | 0,009 | 0,009 | 0,009 | 0,009 |
| 0,009 | 0,009 | 0,009 | 0,009 | 0,010 | 0,009 | 0,009 | 0,009 | 0,009 | 0,010 | 0,009 | 0,009 | 0,009 | 0,009 |
| 0,009 | 0,009 | 0,009 | 0,009 | 0,010 | 0,009 | 0,010 | 0,009 | 0,010 | 0,010 | 0,009 | 0,009 | 0,009 | 0,009 |
| 0,009 | 0,009 | 0,009 | 0,009 | 0,009 | 0,009 | 0,010 | 0,008 | 0,009 | 0,009 | 0,009 | 0,008 | 0,008 | 0,009 |
| 0,008 | 0,008 | 0,008 | 0,009 | 0,009 | 0,009 | 0,010 | 0,009 | 0,009 | 0,009 | 0,009 | 0,008 | 0,009 | 0,009 |
| 0,009 | 0,009 | 0,009 | 0,009 | 0,010 | 0,010 | 0,009 | 0,010 | 0,010 | 0,010 | 0,009 | 0,009 | 0,010 | 0,010 |
| 0,009 | 0,009 | 0,009 | 0,009 | 0,010 | 0,009 | 0,010 | 0,010 | 0,010 | 0,010 | 0,008 | 0,009 | 0,009 | 0,009 |
| 0,009 | 0,009 | 0,009 | 0,009 | 0,010 | 0,009 | 0,010 | 0,009 | 0,010 | 0,010 | 0,009 | 0,009 | 0,010 | 0,008 |
| 0,009 | 0,009 | 0,009 | 0,009 | 0,010 | 0,009 | 0,009 | 0,009 | 0,010 | 0,010 | 0,009 | 0,009 | 0,009 | 0,010 |
| 0,010 | 0,010 | 0,010 | 0,009 | 0,009 | 0,009 | 0,011 | 0,010 | 0,010 | 0,010 | 0,010 | 0,009 | 0,010 | 0,010 |
| 0,009 | 0,009 | 0,009 | 0,009 | 0,011 | 0,009 | 0,010 | 0,010 | 0,010 | 0,010 | 0,009 | 0,009 | 0,010 | 0,009 |
| 0,009 | 0,009 | 0,009 | 0,009 | 0,010 | 0,009 | 0,009 | 0,009 | 0,010 | 0,010 | 0,009 | 0,009 | 0,009 | 0,009 |
| 0,008 | 0,008 | 0,008 | 0,007 | 0,008 | 0,007 | 0,008 | 0,008 | 0,007 | 0,008 | 0,008 | 0,008 | 0,008 | 0,007 |
| 0,007 | 0,006 | 0,006 | 0,006 | 0,006 | 0,006 | 0,007 | 0,007 | 0,006 | 0,007 | 0,006 | 0,006 | 0,006 | 0,006 |
| 0,007 | 0,007 | 0,006 | 0,006 | 0,007 | 0,006 | 0,007 | 0,007 | 0,007 | 0,007 | 0,007 | 0,006 | 0,006 | 0,007 |
| 0,007 | 0,007 | 0,007 | 0,007 | 0,007 | 0,006 | 0,007 | 0,007 | 0,006 | 0,007 | 0,007 | 0,007 | 0,007 | 0,007 |
| 0,005 | 0,005 | 0,005 | 0,004 | 0,005 | 0,004 | 0,005 | 0,005 | 0,005 | 0,005 | 0,005 | 0,004 | 0,005 | 0,005 |
| 0,005 | 0,005 | 0,005 | 0,004 | 0,005 | 0,004 | 0,005 | 0,004 | 0,005 | 0,005 | 0,005 | 0,004 | 0,005 | 0,005 |
| 0,004 | 0,004 | 0,004 | 0,005 | 0,006 | 0,006 | 0,006 | 0,006 | 0,006 | 0,006 | 0,004 | 0,005 | 0,006 | 0,006 |
|       | 0,001 | 0,003 | 0,005 | 0,006 | 0,005 | 0,006 | 0,006 | 0,006 | 0,005 | 0,002 | 0,005 | 0,005 | 0,006 |
| 0,003 |       | 0,003 | 0,005 | 0,005 | 0,005 | 0,006 | 0,006 | 0,006 | 0,005 | 0,002 | 0,005 | 0,005 | 0,006 |
| 0,034 | 0,030 |       | 0,005 | 0,005 | 0,005 | 0,006 | 0,005 | 0,005 | 0,005 | 0,003 | 0,004 | 0,005 | 0,006 |
| 0,076 | 0,072 | 0,078 |       | 0,005 | 0,004 | 0,005 | 0,004 | 0,005 | 0,004 | 0,004 | 0,004 | 0,005 | 0,005 |
| 0,085 | 0,082 | 0,086 | 0,065 |       | 0,004 | 0,006 | 0,003 | 0,001 | 0,002 | 0,005 | 0,004 | 0,005 | 0,005 |
| 0,075 | 0,072 | 0,081 | 0,057 | 0,055 |       | 0,004 | 0,005 | 0,005 | 0,004 | 0,005 | 0,004 | 0,004 | 0,004 |
| 0,086 | 0,084 | 0,087 | 0,076 | 0,072 | 0,050 |       | 0,005 | 0,005 | 0,005 | 0,006 | 0,005 | 0,005 | 0,005 |
| 0,084 | 0,081 | 0,084 | 0,067 | 0,018 | 0,056 | 0,071 |       | 0,002 | 0,003 | 0,005 | 0,004 | 0,005 | 0,005 |
| 0,082 | 0,078 | 0,083 | 0,064 | 0,006 | 0,054 | 0,070 | 0,016 |       | 0,002 | 0,005 | 0,004 | 0,005 | 0,005 |
| 0,086 | 0,082 | 0,086 | 0,070 | 0,016 | 0,059 | 0,074 | 0,026 | 0,013 |       | 0,005 | 0,004 | 0,005 | 0,005 |
| 0,024 | 0,021 | 0,030 | 0,072 | 0,082 | 0,076 | 0,086 | 0,082 | 0,079 | 0,085 |       | 0,005 | 0,005 | 0,006 |
| 0,069 | 0,065 | 0,070 | 0,039 | 0,057 | 0,049 | 0,066 | 0,056 | 0,055 | 0,061 | 0,064 |       | 0,005 | 0,004 |
| 0,090 | 0,086 | 0,091 | 0,074 | 0,067 | 0,061 | 0,077 | 0,068 | 0,065 | 0,069 | 0,089 | 0,065 |       | 0,005 |
| 0,096 | 0,093 | 0,094 | 0,075 | 0,076 | 0,067 | 0,085 | 0,073 | 0,074 | 0,079 | 0,091 | 0,072 | 0,074 |       |
| 0,090 | 0,086 | 0,090 | 0,070 | 0,071 | 0,061 | 0,082 | 0,072 | 0,070 | 0,075 | 0,086 | 0,062 | 0,071 | 0,054 |
| 0,069 | 0,066 | 0,072 | 0,049 | 0,049 | 0,043 | 0,062 | 0,051 | 0,047 | 0,053 | 0,067 | 0,042 | 0,052 | 0,060 |
| 0,077 | 0,074 | 0,078 | 0,061 | 0,022 | 0,050 | 0,066 | 0,022 | 0,019 | 0,028 | 0,074 | 0,052 | 0,063 | 0,070 |
| 0,079 | 0,076 | 0,080 | 0,060 | 0,038 | 0,054 | 0,068 | 0,039 | 0,035 | 0,040 | 0,075 | 0,053 | 0,064 | 0,071 |
| 0,116 | 0,113 | 0,116 | 0,105 | 0,110 | 0,104 | 0,116 | 0,109 | 0,107 | 0,113 | 0,114 | 0,095 | 0,112 | 0,115 |
| 0,120 | 0,116 | 0,117 | 0,106 | 0,106 | 0,106 | 0,120 | 0,107 | 0,104 | 0,112 | 0,118 | 0,101 | 0,118 | 0,118 |

|              |              |              |              |              |              |              |              |              |              |              |              |              |              |
|--------------|--------------|--------------|--------------|--------------|--------------|--------------|--------------|--------------|--------------|--------------|--------------|--------------|--------------|
| 0,133        | 0,131        | 0,134        | 0,123        | 0,126        | 0,123        | 0,132        | 0,127        | 0,123        | 0,127        | 0,133        | 0,114        | 0,132        | 0,133        |
| 0,119        | 0,116        | 0,118        | 0,105        | 0,109        | 0,107        | 0,118        | 0,109        | 0,106        | 0,111        | 0,117        | 0,099        | 0,118        | 0,116        |
| 0,126        | 0,123        | 0,120        | 0,112        | 0,115        | 0,108        | 0,125        | 0,116        | 0,112        | 0,117        | 0,123        | 0,103        | 0,119        | 0,123        |
| 0,124        | 0,120        | 0,118        | 0,114        | 0,116        | 0,112        | 0,125        | 0,114        | 0,113        | 0,116        | 0,120        | 0,104        | 0,121        | 0,122        |
| 0,129        | 0,126        | 0,130        | 0,117        | 0,125        | 0,115        | 0,131        | 0,124        | 0,122        | 0,126        | 0,128        | 0,114        | 0,134        | 0,128        |
| 0,121        | 0,117        | 0,120        | 0,106        | 0,113        | 0,110        | 0,121        | 0,113        | 0,110        | 0,114        | 0,120        | 0,102        | 0,120        | 0,118        |
| 0,124        | 0,121        | 0,121        | 0,113        | 0,118        | 0,115        | 0,127        | 0,116        | 0,114        | 0,120        | 0,121        | 0,105        | 0,125        | 0,124        |
| 0,136        | 0,132        | 0,129        | 0,124        | 0,131        | 0,123        | 0,137        | 0,130        | 0,128        | 0,133        | 0,129        | 0,119        | 0,131        | 0,137        |
| 0,128        | 0,124        | 0,122        | 0,114        | 0,113        | 0,111        | 0,122        | 0,115        | 0,111        | 0,117        | 0,125        | 0,106        | 0,123        | 0,120        |
| 0,128        | 0,124        | 0,123        | 0,113        | 0,118        | 0,113        | 0,129        | 0,119        | 0,115        | 0,120        | 0,124        | 0,107        | 0,122        | 0,128        |
| 0,124        | 0,120        | 0,123        | 0,112        | 0,118        | 0,115        | 0,128        | 0,120        | 0,115        | 0,122        | 0,125        | 0,108        | 0,125        | 0,127        |
| 0,134        | 0,130        | 0,128        | 0,121        | 0,123        | 0,118        | 0,133        | 0,123        | 0,120        | 0,124        | 0,130        | 0,114        | 0,128        | 0,130        |
| 0,129        | 0,126        | 0,125        | 0,113        | 0,118        | 0,115        | 0,123        | 0,118        | 0,114        | 0,118        | 0,125        | 0,112        | 0,128        | 0,126        |
| 0,137        | 0,133        | 0,131        | 0,128        | 0,130        | 0,125        | 0,136        | 0,128        | 0,128        | 0,132        | 0,132        | 0,122        | 0,136        | 0,140        |
| 0,130        | 0,127        | 0,126        | 0,117        | 0,121        | 0,116        | 0,128        | 0,122        | 0,119        | 0,122        | 0,125        | 0,112        | 0,127        | 0,128        |
| 0,127        | 0,124        | 0,130        | 0,120        | 0,121        | 0,113        | 0,127        | 0,121        | 0,118        | 0,122        | 0,128        | 0,114        | 0,129        | 0,127        |
| 0,127        | 0,125        | 0,130        | 0,120        | 0,121        | 0,113        | 0,127        | 0,120        | 0,118        | 0,122        | 0,127        | 0,115        | 0,130        | 0,125        |
| 0,134        | 0,132        | 0,133        | 0,122        | 0,127        | 0,119        | 0,132        | 0,126        | 0,125        | 0,127        | 0,132        | 0,116        | 0,135        | 0,130        |
| 0,138        | 0,136        | 0,138        | 0,126        | 0,131        | 0,127        | 0,138        | 0,132        | 0,131        | 0,134        | 0,136        | 0,123        | 0,136        | 0,136        |
| 0,138        | 0,135        | 0,143        | 0,127        | 0,131        | 0,126        | 0,136        | 0,130        | 0,130        | 0,132        | 0,137        | 0,123        | 0,140        | 0,135        |
| 0,145        | 0,142        | 0,139        | 0,134        | 0,137        | 0,130        | 0,142        | 0,135        | 0,134        | 0,137        | 0,140        | 0,125        | 0,141        | 0,140        |
| 0,120        | 0,116        | 0,118        | 0,105        | 0,112        | 0,109        | 0,120        | 0,112        | 0,109        | 0,113        | 0,118        | 0,102        | 0,119        | 0,117        |
| 0,120        | 0,116        | 0,117        | 0,110        | 0,117        | 0,112        | 0,124        | 0,117        | 0,116        | 0,122        | 0,117        | 0,101        | 0,122        | 0,123        |
| 0,115        | 0,112        | 0,114        | 0,101        | 0,105        | 0,103        | 0,116        | 0,106        | 0,103        | 0,110        | 0,114        | 0,093        | 0,111        | 0,113        |
| 0,127        | 0,124        | 0,121        | 0,118        | 0,119        | 0,116        | 0,130        | 0,118        | 0,116        | 0,119        | 0,123        | 0,109        | 0,124        | 0,126        |
| 0,123        | 0,120        | 0,123        | 0,108        | 0,116        | 0,108        | 0,121        | 0,115        | 0,112        | 0,117        | 0,123        | 0,103        | 0,122        | 0,122        |
| <b>0,040</b> | <b>0,037</b> | <b>0,043</b> | <b>0,084</b> | <b>0,091</b> | <b>0,086</b> | <b>0,092</b> | <b>0,089</b> | <b>0,088</b> | <b>0,093</b> | <b>0,039</b> | <b>0,077</b> | <b>0,099</b> | <b>0,100</b> |
| <b>0,040</b> | <b>0,037</b> | <b>0,043</b> | <b>0,084</b> | <b>0,090</b> | <b>0,085</b> | <b>0,092</b> | <b>0,088</b> | <b>0,087</b> | <b>0,092</b> | <b>0,039</b> | <b>0,076</b> | <b>0,098</b> | <b>0,100</b> |
| <b>0,025</b> | <b>0,023</b> | <b>0,028</b> | <b>0,076</b> | <b>0,084</b> | <b>0,078</b> | <b>0,085</b> | <b>0,083</b> | <b>0,081</b> | <b>0,086</b> | <b>0,022</b> | <b>0,067</b> | <b>0,087</b> | <b>0,089</b> |
| <b>0,125</b> | <b>0,122</b> | <b>0,120</b> | <b>0,114</b> | <b>0,114</b> | <b>0,110</b> | <b>0,124</b> | <b>0,114</b> | <b>0,110</b> | <b>0,117</b> | <b>0,124</b> | <b>0,105</b> | <b>0,119</b> | <b>0,120</b> |
| <b>0,137</b> | <b>0,133</b> | <b>0,134</b> | <b>0,127</b> | <b>0,126</b> | <b>0,123</b> | <b>0,131</b> | <b>0,123</b> | <b>0,123</b> | <b>0,131</b> | <b>0,135</b> | <b>0,122</b> | <b>0,134</b> | <b>0,132</b> |



| 34    | 35    | 36    | 37    | 38    | 39    | 40    | 41    | 42    | 43    | 44    | 45    | 46    | 47    |
|-------|-------|-------|-------|-------|-------|-------|-------|-------|-------|-------|-------|-------|-------|
| 0,009 | 0,009 | 0,009 | 0,009 | 0,008 | 0,009 | 0,009 | 0,009 | 0,009 | 0,010 | 0,010 | 0,009 | 0,010 | 0,009 |
| 0,009 | 0,009 | 0,009 | 0,009 | 0,008 | 0,009 | 0,009 | 0,009 | 0,009 | 0,009 | 0,009 | 0,009 | 0,009 | 0,010 |
| 0,010 | 0,010 | 0,009 | 0,009 | 0,009 | 0,009 | 0,009 | 0,009 | 0,009 | 0,010 | 0,009 | 0,009 | 0,010 | 0,010 |
| 0,009 | 0,009 | 0,008 | 0,009 | 0,008 | 0,008 | 0,009 | 0,009 | 0,008 | 0,008 | 0,008 | 0,009 | 0,009 | 0,009 |
| 0,009 | 0,009 | 0,008 | 0,009 | 0,009 | 0,010 | 0,010 | 0,010 | 0,009 | 0,010 | 0,009 | 0,010 | 0,011 | 0,010 |
| 0,009 | 0,009 | 0,009 | 0,009 | 0,009 | 0,010 | 0,009 | 0,009 | 0,009 | 0,009 | 0,010 | 0,009 | 0,009 | 0,010 |
| 0,009 | 0,009 | 0,009 | 0,009 | 0,008 | 0,009 | 0,009 | 0,009 | 0,010 | 0,009 | 0,009 | 0,009 | 0,009 | 0,009 |
| 0,009 | 0,009 | 0,009 | 0,009 | 0,009 | 0,009 | 0,009 | 0,009 | 0,010 | 0,009 | 0,010 | 0,010 | 0,010 | 0,010 |
| 0,010 | 0,009 | 0,009 | 0,009 | 0,009 | 0,009 | 0,009 | 0,009 | 0,009 | 0,010 | 0,010 | 0,009 | 0,010 | 0,010 |
| 0,011 | 0,010 | 0,009 | 0,010 | 0,010 | 0,009 | 0,010 | 0,010 | 0,010 | 0,010 | 0,010 | 0,010 | 0,010 | 0,010 |
| 0,010 | 0,009 | 0,010 | 0,009 | 0,009 | 0,009 | 0,009 | 0,010 | 0,009 | 0,010 | 0,010 | 0,010 | 0,010 | 0,010 |
| 0,010 | 0,009 | 0,009 | 0,009 | 0,009 | 0,009 | 0,009 | 0,009 | 0,009 | 0,010 | 0,009 | 0,009 | 0,010 | 0,010 |
| 0,008 | 0,007 | 0,007 | 0,007 | 0,008 | 0,008 | 0,007 | 0,008 | 0,008 | 0,008 | 0,008 | 0,008 | 0,008 | 0,008 |
| 0,006 | 0,006 | 0,006 | 0,006 | 0,007 | 0,007 | 0,007 | 0,007 | 0,006 | 0,006 | 0,007 | 0,007 | 0,007 | 0,007 |
| 0,007 | 0,006 | 0,007 | 0,006 | 0,007 | 0,007 | 0,007 | 0,007 | 0,006 | 0,007 | 0,007 | 0,007 | 0,007 | 0,007 |
| 0,007 | 0,006 | 0,007 | 0,007 | 0,008 | 0,007 | 0,007 | 0,007 | 0,007 | 0,007 | 0,008 | 0,007 | 0,007 | 0,007 |
| 0,005 | 0,004 | 0,005 | 0,004 | 0,006 | 0,007 | 0,007 | 0,006 | 0,006 | 0,006 | 0,007 | 0,006 | 0,007 | 0,007 |
| 0,005 | 0,004 | 0,004 | 0,004 | 0,006 | 0,007 | 0,007 | 0,006 | 0,006 | 0,007 | 0,007 | 0,006 | 0,006 | 0,006 |
| 0,006 | 0,005 | 0,006 | 0,006 | 0,006 | 0,008 | 0,007 | 0,007 | 0,007 | 0,008 | 0,008 | 0,007 | 0,007 | 0,007 |
| 0,006 | 0,005 | 0,006 | 0,006 | 0,006 | 0,007 | 0,007 | 0,007 | 0,007 | 0,007 | 0,008 | 0,007 | 0,007 | 0,007 |
| 0,006 | 0,004 | 0,006 | 0,005 | 0,006 | 0,007 | 0,007 | 0,007 | 0,007 | 0,007 | 0,007 | 0,007 | 0,007 | 0,007 |
| 0,006 | 0,005 | 0,005 | 0,005 | 0,006 | 0,006 | 0,007 | 0,007 | 0,006 | 0,007 | 0,007 | 0,007 | 0,007 | 0,007 |
| 0,004 | 0,004 | 0,004 | 0,005 | 0,005 | 0,007 | 0,007 | 0,006 | 0,006 | 0,006 | 0,007 | 0,006 | 0,006 | 0,006 |
| 0,005 | 0,004 | 0,003 | 0,004 | 0,006 | 0,006 | 0,007 | 0,006 | 0,006 | 0,007 | 0,006 | 0,006 | 0,006 | 0,007 |
| 0,004 | 0,004 | 0,004 | 0,004 | 0,005 | 0,006 | 0,006 | 0,006 | 0,006 | 0,006 | 0,007 | 0,006 | 0,006 | 0,006 |
| 0,005 | 0,005 | 0,006 | 0,005 | 0,006 | 0,007 | 0,007 | 0,006 | 0,006 | 0,007 | 0,008 | 0,006 | 0,007 | 0,007 |
| 0,005 | 0,004 | 0,003 | 0,004 | 0,006 | 0,007 | 0,007 | 0,007 | 0,006 | 0,007 | 0,007 | 0,007 | 0,007 | 0,007 |
| 0,005 | 0,004 | 0,002 | 0,004 | 0,006 | 0,007 | 0,006 | 0,006 | 0,006 | 0,007 | 0,006 | 0,006 | 0,006 | 0,007 |
| 0,005 | 0,004 | 0,003 | 0,004 | 0,006 | 0,007 | 0,007 | 0,007 | 0,006 | 0,007 | 0,007 | 0,006 | 0,007 | 0,006 |
| 0,006 | 0,004 | 0,005 | 0,005 | 0,006 | 0,007 | 0,007 | 0,007 | 0,007 | 0,007 | 0,007 | 0,007 | 0,007 | 0,007 |
| 0,004 | 0,004 | 0,004 | 0,005 | 0,005 | 0,006 | 0,007 | 0,006 | 0,006 | 0,006 | 0,007 | 0,006 | 0,006 | 0,006 |
| 0,005 | 0,004 | 0,005 | 0,005 | 0,005 | 0,007 | 0,007 | 0,007 | 0,007 | 0,007 | 0,007 | 0,007 | 0,007 | 0,007 |
| 0,004 | 0,004 | 0,005 | 0,005 | 0,006 | 0,006 | 0,006 | 0,006 | 0,006 | 0,006 | 0,006 | 0,006 | 0,006 | 0,007 |
|       | 0,004 | 0,005 | 0,005 | 0,005 | 0,007 | 0,007 | 0,006 | 0,006 | 0,007 | 0,007 | 0,006 | 0,006 | 0,006 |
| 0,052 |       | 0,005 | 0,004 | 0,005 | 0,006 | 0,006 | 0,006 | 0,006 | 0,006 | 0,007 | 0,006 | 0,006 | 0,006 |
| 0,066 | 0,047 |       | 0,004 | 0,006 | 0,007 | 0,006 | 0,006 | 0,006 | 0,006 | 0,007 | 0,006 | 0,006 | 0,006 |
| 0,068 | 0,046 | 0,034 |       | 0,006 | 0,007 | 0,007 | 0,006 | 0,006 | 0,006 | 0,007 | 0,006 | 0,006 | 0,007 |
| 0,111 | 0,102 | 0,105 | 0,107 |       | 0,006 | 0,006 | 0,006 | 0,006 | 0,006 | 0,006 | 0,006 | 0,007 | 0,006 |
| 0,113 | 0,105 | 0,105 | 0,108 | 0,107 |       | 0,005 | 0,004 | 0,004 | 0,005 | 0,005 | 0,004 | 0,004 | 0,006 |

|       |       |       |       |       |       |       |       |       |       |       |       |       |       |
|-------|-------|-------|-------|-------|-------|-------|-------|-------|-------|-------|-------|-------|-------|
| 0,125 | 0,120 | 0,120 | 0,123 | 0,112 | 0,093 |       | 0,005 | 0,005 | 0,005 | 0,004 | 0,005 | 0,005 | 0,006 |
| 0,113 | 0,104 | 0,103 | 0,105 | 0,106 | 0,051 | 0,084 |       | 0,004 | 0,004 | 0,005 | 0,002 | 0,003 | 0,006 |
| 0,119 | 0,107 | 0,109 | 0,111 | 0,116 | 0,067 | 0,092 | 0,062 |       | 0,004 | 0,005 | 0,004 | 0,004 | 0,006 |
| 0,114 | 0,111 | 0,109 | 0,112 | 0,113 | 0,072 | 0,089 | 0,060 | 0,053 |       | 0,005 | 0,004 | 0,005 | 0,006 |
| 0,124 | 0,117 | 0,116 | 0,120 | 0,113 | 0,085 | 0,060 | 0,080 | 0,087 | 0,082 |       | 0,005 | 0,005 | 0,006 |
| 0,117 | 0,108 | 0,107 | 0,107 | 0,108 | 0,057 | 0,087 | 0,013 | 0,066 | 0,066 | 0,081 |       | 0,003 | 0,006 |
| 0,121 | 0,112 | 0,112 | 0,115 | 0,111 | 0,057 | 0,089 | 0,033 | 0,068 | 0,070 | 0,081 | 0,035 |       | 0,006 |
| 0,127 | 0,124 | 0,125 | 0,123 | 0,119 | 0,097 | 0,106 | 0,088 | 0,096 | 0,093 | 0,097 | 0,090 | 0,092 |       |
| 0,112 | 0,109 | 0,108 | 0,112 | 0,112 | 0,066 | 0,087 | 0,059 | 0,035 | 0,050 | 0,085 | 0,065 | 0,074 | 0,094 |
| 0,121 | 0,110 | 0,112 | 0,116 | 0,116 | 0,064 | 0,090 | 0,059 | 0,020 | 0,051 | 0,086 | 0,064 | 0,069 | 0,097 |
| 0,119 | 0,111 | 0,114 | 0,116 | 0,117 | 0,059 | 0,098 | 0,058 | 0,073 | 0,075 | 0,090 | 0,060 | 0,066 | 0,094 |
| 0,126 | 0,119 | 0,116 | 0,123 | 0,121 | 0,071 | 0,097 | 0,066 | 0,023 | 0,055 | 0,090 | 0,070 | 0,073 | 0,102 |
| 0,124 | 0,117 | 0,110 | 0,115 | 0,121 | 0,069 | 0,090 | 0,066 | 0,031 | 0,057 | 0,085 | 0,067 | 0,072 | 0,093 |
| 0,125 | 0,127 | 0,125 | 0,126 | 0,124 | 0,094 | 0,104 | 0,085 | 0,097 | 0,088 | 0,098 | 0,087 | 0,092 | 0,036 |
| 0,128 | 0,118 | 0,117 | 0,120 | 0,120 | 0,077 | 0,097 | 0,068 | 0,041 | 0,063 | 0,088 | 0,071 | 0,080 | 0,100 |
| 0,122 | 0,115 | 0,115 | 0,119 | 0,114 | 0,089 | 0,064 | 0,081 | 0,090 | 0,084 | 0,046 | 0,082 | 0,087 | 0,102 |
| 0,121 | 0,115 | 0,115 | 0,117 | 0,114 | 0,091 | 0,064 | 0,082 | 0,092 | 0,084 | 0,048 | 0,083 | 0,088 | 0,103 |
| 0,125 | 0,122 | 0,122 | 0,128 | 0,117 | 0,096 | 0,071 | 0,088 | 0,095 | 0,091 | 0,057 | 0,090 | 0,094 | 0,099 |
| 0,129 | 0,126 | 0,124 | 0,132 | 0,121 | 0,095 | 0,071 | 0,085 | 0,093 | 0,092 | 0,059 | 0,086 | 0,088 | 0,107 |
| 0,133 | 0,126 | 0,128 | 0,132 | 0,123 | 0,101 | 0,074 | 0,088 | 0,097 | 0,093 | 0,059 | 0,088 | 0,092 | 0,105 |
| 0,132 | 0,131 | 0,132 | 0,130 | 0,128 | 0,103 | 0,109 | 0,095 | 0,108 | 0,100 | 0,104 | 0,100 | 0,098 | 0,056 |
| 0,116 | 0,107 | 0,106 | 0,107 | 0,107 | 0,056 | 0,086 | 0,012 | 0,065 | 0,065 | 0,080 | 0,001 | 0,035 | 0,089 |
| 0,119 | 0,109 | 0,112 | 0,116 | 0,111 | 0,058 | 0,093 | 0,055 | 0,072 | 0,077 | 0,087 | 0,059 | 0,064 | 0,090 |
| 0,105 | 0,100 | 0,101 | 0,106 | 0,101 | 0,043 | 0,083 | 0,041 | 0,061 | 0,065 | 0,077 | 0,044 | 0,051 | 0,087 |
| 0,117 | 0,116 | 0,114 | 0,117 | 0,117 | 0,076 | 0,093 | 0,063 | 0,057 | 0,008 | 0,085 | 0,069 | 0,073 | 0,097 |
| 0,116 | 0,107 | 0,111 | 0,113 | 0,111 | 0,060 | 0,090 | 0,062 | 0,070 | 0,072 | 0,077 | 0,062 | 0,068 | 0,096 |
| 0,097 | 0,076 | 0,083 | 0,087 | 0,120 | 0,125 | 0,141 | 0,124 | 0,130 | 0,126 | 0,133 | 0,125 | 0,130 | 0,139 |
| 0,096 | 0,075 | 0,082 | 0,086 | 0,119 | 0,125 | 0,141 | 0,124 | 0,130 | 0,125 | 0,133 | 0,125 | 0,130 | 0,139 |
| 0,086 | 0,068 | 0,075 | 0,078 | 0,112 | 0,116 | 0,132 | 0,117 | 0,119 | 0,117 | 0,125 | 0,118 | 0,118 | 0,127 |
| 0,115 | 0,108 | 0,107 | 0,110 | 0,114 | 0,064 | 0,087 | 0,059 | 0,030 | 0,050 | 0,084 | 0,065 | 0,073 | 0,094 |
| 0,128 | 0,122 | 0,119 | 0,126 | 0,130 | 0,134 | 0,144 | 0,128 | 0,135 | 0,133 | 0,139 | 0,131 | 0,135 | 0,148 |

| 48    | 49    | 50    | 51    | 52    | 53    | 54    | 55    | 56    | 57    | 58    | 59    | 60    | 61    |
|-------|-------|-------|-------|-------|-------|-------|-------|-------|-------|-------|-------|-------|-------|
| 0,009 | 0,009 | 0,009 | 0,009 | 0,009 | 0,009 | 0,009 | 0,009 | 0,010 | 0,009 | 0,009 | 0,009 | 0,009 | 0,009 |
| 0,008 | 0,009 | 0,009 | 0,009 | 0,009 | 0,010 | 0,009 | 0,009 | 0,010 | 0,010 | 0,009 | 0,010 | 0,009 | 0,009 |
| 0,009 | 0,009 | 0,008 | 0,010 | 0,009 | 0,010 | 0,009 | 0,009 | 0,009 | 0,009 | 0,009 | 0,010 | 0,009 | 0,009 |
| 0,008 | 0,008 | 0,008 | 0,008 | 0,008 | 0,010 | 0,008 | 0,009 | 0,009 | 0,008 | 0,009 | 0,009 | 0,009 | 0,009 |
| 0,010 | 0,009 | 0,010 | 0,010 | 0,009 | 0,010 | 0,009 | 0,011 | 0,011 | 0,009 | 0,011 | 0,010 | 0,010 | 0,010 |
| 0,009 | 0,009 | 0,009 | 0,010 | 0,009 | 0,010 | 0,009 | 0,010 | 0,010 | 0,010 | 0,010 | 0,010 | 0,009 | 0,009 |
| 0,009 | 0,009 | 0,008 | 0,010 | 0,009 | 0,010 | 0,009 | 0,009 | 0,010 | 0,009 | 0,009 | 0,009 | 0,009 | 0,008 |
| 0,009 | 0,009 | 0,009 | 0,010 | 0,009 | 0,010 | 0,009 | 0,010 | 0,010 | 0,009 | 0,010 | 0,010 | 0,010 | 0,010 |
| 0,009 | 0,009 | 0,009 | 0,010 | 0,009 | 0,010 | 0,009 | 0,009 | 0,010 | 0,010 | 0,009 | 0,010 | 0,010 | 0,009 |
| 0,009 | 0,010 | 0,010 | 0,010 | 0,010 | 0,010 | 0,010 | 0,010 | 0,011 | 0,011 | 0,011 | 0,011 | 0,011 | 0,010 |
| 0,009 | 0,010 | 0,010 | 0,010 | 0,010 | 0,010 | 0,009 | 0,010 | 0,010 | 0,010 | 0,009 | 0,010 | 0,010 | 0,010 |
| 0,009 | 0,009 | 0,009 | 0,010 | 0,009 | 0,010 | 0,009 | 0,009 | 0,009 | 0,010 | 0,009 | 0,010 | 0,009 | 0,009 |
| 0,008 | 0,008 | 0,008 | 0,008 | 0,007 | 0,008 | 0,008 | 0,008 | 0,008 | 0,009 | 0,008 | 0,008 | 0,009 | 0,008 |
| 0,006 | 0,006 | 0,007 | 0,006 | 0,006 | 0,007 | 0,006 | 0,008 | 0,007 | 0,008 | 0,007 | 0,007 | 0,007 | 0,007 |
| 0,006 | 0,006 | 0,008 | 0,006 | 0,007 | 0,007 | 0,007 | 0,008 | 0,007 | 0,008 | 0,007 | 0,007 | 0,007 | 0,007 |
| 0,007 | 0,007 | 0,008 | 0,007 | 0,007 | 0,007 | 0,007 | 0,008 | 0,008 | 0,008 | 0,008 | 0,008 | 0,007 | 0,007 |
| 0,006 | 0,006 | 0,007 | 0,007 | 0,006 | 0,007 | 0,006 | 0,007 | 0,007 | 0,008 | 0,007 | 0,008 | 0,007 | 0,006 |
| 0,006 | 0,006 | 0,007 | 0,007 | 0,006 | 0,006 | 0,006 | 0,007 | 0,007 | 0,008 | 0,008 | 0,007 | 0,006 | 0,006 |
| 0,007 | 0,007 | 0,008 | 0,008 | 0,007 | 0,007 | 0,008 | 0,008 | 0,008 | 0,008 | 0,008 | 0,008 | 0,007 | 0,007 |
| 0,007 | 0,007 | 0,007 | 0,008 | 0,007 | 0,007 | 0,008 | 0,008 | 0,008 | 0,008 | 0,008 | 0,008 | 0,007 | 0,007 |
| 0,007 | 0,007 | 0,007 | 0,008 | 0,007 | 0,007 | 0,008 | 0,008 | 0,008 | 0,008 | 0,008 | 0,007 | 0,007 | 0,007 |
| 0,006 | 0,007 | 0,007 | 0,007 | 0,006 | 0,007 | 0,007 | 0,008 | 0,007 | 0,008 | 0,007 | 0,007 | 0,007 | 0,007 |
| 0,006 | 0,006 | 0,006 | 0,006 | 0,006 | 0,006 | 0,006 | 0,007 | 0,007 | 0,008 | 0,007 | 0,007 | 0,006 | 0,006 |
| 0,006 | 0,007 | 0,007 | 0,007 | 0,006 | 0,007 | 0,007 | 0,007 | 0,007 | 0,008 | 0,007 | 0,007 | 0,007 | 0,006 |
| 0,006 | 0,006 | 0,006 | 0,006 | 0,006 | 0,007 | 0,006 | 0,007 | 0,007 | 0,007 | 0,007 | 0,007 | 0,007 | 0,006 |
| 0,006 | 0,007 | 0,007 | 0,007 | 0,006 | 0,007 | 0,007 | 0,008 | 0,008 | 0,009 | 0,008 | 0,008 | 0,007 | 0,006 |
| 0,006 | 0,006 | 0,007 | 0,007 | 0,006 | 0,007 | 0,007 | 0,007 | 0,007 | 0,008 | 0,007 | 0,007 | 0,007 | 0,007 |
| 0,006 | 0,007 | 0,007 | 0,007 | 0,006 | 0,007 | 0,007 | 0,007 | 0,007 | 0,008 | 0,007 | 0,007 | 0,007 | 0,006 |
| 0,006 | 0,007 | 0,007 | 0,007 | 0,006 | 0,006 | 0,007 | 0,007 | 0,007 | 0,008 | 0,007 | 0,007 | 0,007 | 0,006 |
| 0,007 | 0,007 | 0,007 | 0,007 | 0,007 | 0,007 | 0,007 | 0,008 | 0,008 | 0,008 | 0,008 | 0,007 | 0,007 | 0,007 |
| 0,006 | 0,006 | 0,006 | 0,006 | 0,006 | 0,006 | 0,006 | 0,007 | 0,007 | 0,008 | 0,007 | 0,007 | 0,006 | 0,006 |
| 0,007 | 0,007 | 0,007 | 0,008 | 0,007 | 0,007 | 0,007 | 0,008 | 0,008 | 0,008 | 0,008 | 0,008 | 0,007 | 0,007 |
| 0,006 | 0,006 | 0,006 | 0,007 | 0,006 | 0,007 | 0,007 | 0,007 | 0,007 | 0,007 | 0,007 | 0,008 | 0,007 | 0,006 |
| 0,006 | 0,006 | 0,007 | 0,007 | 0,006 | 0,006 | 0,007 | 0,007 | 0,007 | 0,007 | 0,007 | 0,007 | 0,006 | 0,006 |
| 0,005 | 0,006 | 0,006 | 0,006 | 0,006 | 0,006 | 0,006 | 0,006 | 0,006 | 0,008 | 0,007 | 0,007 | 0,006 | 0,006 |
| 0,006 | 0,006 | 0,007 | 0,007 | 0,006 | 0,006 | 0,007 | 0,007 | 0,007 | 0,008 | 0,007 | 0,007 | 0,006 | 0,006 |
| 0,006 | 0,006 | 0,007 | 0,007 | 0,006 | 0,006 | 0,007 | 0,007 | 0,007 | 0,008 | 0,007 | 0,007 | 0,006 | 0,006 |
| 0,006 | 0,006 | 0,006 | 0,007 | 0,006 | 0,007 | 0,006 | 0,007 | 0,007 | 0,007 | 0,007 | 0,007 | 0,006 | 0,006 |
| 0,004 | 0,004 | 0,004 | 0,004 | 0,005 | 0,006 | 0,005 | 0,006 | 0,006 | 0,006 | 0,006 | 0,006 | 0,006 | 0,004 |

|       |       |       |       |       |       |       |       |       |       |       |       |       |       |
|-------|-------|-------|-------|-------|-------|-------|-------|-------|-------|-------|-------|-------|-------|
| 0,006 | 0,005 | 0,005 | 0,006 | 0,005 | 0,006 | 0,005 | 0,005 | 0,005 | 0,005 | 0,005 | 0,005 | 0,006 | 0,005 |
| 0,004 | 0,004 | 0,005 | 0,005 | 0,004 | 0,005 | 0,004 | 0,006 | 0,005 | 0,005 | 0,005 | 0,006 | 0,005 | 0,002 |
| 0,003 | 0,002 | 0,004 | 0,003 | 0,003 | 0,006 | 0,004 | 0,006 | 0,006 | 0,006 | 0,005 | 0,006 | 0,006 | 0,004 |
| 0,004 | 0,004 | 0,005 | 0,004 | 0,004 | 0,006 | 0,004 | 0,005 | 0,005 | 0,005 | 0,005 | 0,006 | 0,006 | 0,004 |
| 0,006 | 0,005 | 0,006 | 0,005 | 0,005 | 0,006 | 0,005 | 0,004 | 0,004 | 0,004 | 0,004 | 0,005 | 0,006 | 0,005 |
| 0,004 | 0,004 | 0,005 | 0,004 | 0,004 | 0,005 | 0,004 | 0,005 | 0,005 | 0,006 | 0,005 | 0,006 | 0,006 | 0,001 |
| 0,005 | 0,005 | 0,005 | 0,005 | 0,004 | 0,006 | 0,005 | 0,005 | 0,006 | 0,006 | 0,005 | 0,006 | 0,006 | 0,003 |
| 0,006 | 0,006 | 0,006 | 0,006 | 0,006 | 0,003 | 0,006 | 0,006 | 0,006 | 0,006 | 0,006 | 0,006 | 0,004 | 0,006 |
|       | 0,003 | 0,005 | 0,003 | 0,004 | 0,006 | 0,004 | 0,006 | 0,006 | 0,006 | 0,006 | 0,006 | 0,006 | 0,004 |
| 0,032 |       | 0,005 | 0,003 | 0,003 | 0,006 | 0,004 | 0,006 | 0,006 | 0,005 | 0,005 | 0,006 | 0,006 | 0,004 |
| 0,071 | 0,073 |       | 0,005 | 0,004 | 0,006 | 0,005 | 0,006 | 0,006 | 0,006 | 0,006 | 0,006 | 0,007 | 0,005 |
| 0,038 | 0,023 | 0,078 |       | 0,003 | 0,006 | 0,004 | 0,006 | 0,006 | 0,006 | 0,006 | 0,006 | 0,006 | 0,004 |
| 0,040 | 0,032 | 0,074 | 0,036 |       | 0,006 | 0,004 | 0,005 | 0,005 | 0,006 | 0,005 | 0,006 | 0,006 | 0,004 |
| 0,088 | 0,095 | 0,100 | 0,101 | 0,093 |       | 0,006 | 0,007 | 0,007 | 0,007 | 0,007 | 0,007 | 0,004 | 0,005 |
| 0,049 | 0,041 | 0,084 | 0,048 | 0,044 | 0,095 |       | 0,006 | 0,006 | 0,006 | 0,006 | 0,006 | 0,006 | 0,004 |
| 0,084 | 0,092 | 0,096 | 0,095 | 0,089 | 0,101 | 0,093 |       | 0,002 | 0,004 | 0,004 | 0,004 | 0,006 | 0,005 |
| 0,085 | 0,093 | 0,098 | 0,096 | 0,089 | 0,102 | 0,094 | 0,009 |       | 0,004 | 0,005 | 0,004 | 0,006 | 0,005 |
| 0,088 | 0,092 | 0,100 | 0,099 | 0,092 | 0,104 | 0,092 | 0,051 | 0,054 |       | 0,004 | 0,003 | 0,006 | 0,006 |
| 0,088 | 0,092 | 0,097 | 0,097 | 0,089 | 0,106 | 0,094 | 0,055 | 0,056 | 0,053 |       | 0,004 | 0,007 | 0,005 |
| 0,093 | 0,097 | 0,101 | 0,099 | 0,093 | 0,109 | 0,096 | 0,057 | 0,057 | 0,035 | 0,053 |       | 0,006 | 0,006 |
| 0,101 | 0,108 | 0,110 | 0,111 | 0,104 | 0,053 | 0,110 | 0,106 | 0,104 | 0,105 | 0,105 | 0,110 |       | 0,006 |
| 0,064 | 0,063 | 0,059 | 0,069 | 0,066 | 0,086 | 0,071 | 0,082 | 0,083 | 0,089 | 0,085 | 0,088 | 0,099 |       |
| 0,069 | 0,071 | 0,069 | 0,079 | 0,076 | 0,094 | 0,080 | 0,087 | 0,089 | 0,098 | 0,097 | 0,102 | 0,095 | 0,058 |
| 0,056 | 0,056 | 0,055 | 0,064 | 0,063 | 0,089 | 0,067 | 0,082 | 0,083 | 0,086 | 0,087 | 0,087 | 0,094 | 0,044 |
| 0,054 | 0,055 | 0,080 | 0,059 | 0,062 | 0,092 | 0,066 | 0,088 | 0,087 | 0,095 | 0,095 | 0,096 | 0,105 | 0,068 |
| 0,067 | 0,068 | 0,074 | 0,072 | 0,072 | 0,094 | 0,073 | 0,081 | 0,081 | 0,089 | 0,086 | 0,091 | 0,104 | 0,061 |
| 0,132 | 0,132 | 0,131 | 0,138 | 0,133 | 0,136 | 0,130 | 0,135 | 0,136 | 0,142 | 0,144 | 0,142 | 0,147 | 0,124 |
| 0,132 | 0,132 | 0,132 | 0,138 | 0,133 | 0,136 | 0,130 | 0,135 | 0,136 | 0,142 | 0,145 | 0,143 | 0,147 | 0,124 |
| 0,121 | 0,121 | 0,123 | 0,125 | 0,124 | 0,131 | 0,125 | 0,124 | 0,124 | 0,129 | 0,134 | 0,133 | 0,138 | 0,117 |
| 0,022 | 0,028 | 0,072 | 0,034 | 0,041 | 0,091 | 0,049 | 0,087 | 0,088 | 0,092 | 0,089 | 0,093 | 0,103 | 0,064 |
| 0,130 | 0,135 | 0,146 | 0,140 | 0,131 | 0,149 | 0,137 | 0,141 | 0,141 | 0,147 | 0,146 | 0,144 | 0,153 | 0,130 |

| 62    | 63    | 64    | 65    | 66    | 67    | 68    | 69    | 70    |
|-------|-------|-------|-------|-------|-------|-------|-------|-------|
| 0,009 | 0,009 | 0,010 | 0,009 | 0,010 | 0,010 | 0,009 | 0,009 | 0,010 |
| 0,008 | 0,009 | 0,009 | 0,009 | 0,009 | 0,009 | 0,009 | 0,008 | 0,009 |
| 0,009 | 0,009 | 0,010 | 0,010 | 0,009 | 0,009 | 0,009 | 0,009 | 0,010 |
| 0,008 | 0,008 | 0,008 | 0,009 | 0,009 | 0,009 | 0,009 | 0,008 | 0,009 |
| 0,010 | 0,010 | 0,010 | 0,010 | 0,009 | 0,008 | 0,009 | 0,010 | 0,010 |
| 0,009 | 0,009 | 0,009 | 0,010 | 0,009 | 0,009 | 0,009 | 0,009 | 0,009 |
| 0,009 | 0,009 | 0,009 | 0,009 | 0,009 | 0,009 | 0,008 | 0,009 | 0,009 |
| 0,010 | 0,009 | 0,009 | 0,010 | 0,010 | 0,010 | 0,009 | 0,009 | 0,010 |
| 0,009 | 0,009 | 0,010 | 0,010 | 0,009 | 0,009 | 0,009 | 0,009 | 0,010 |
| 0,010 | 0,010 | 0,010 | 0,010 | 0,010 | 0,010 | 0,010 | 0,010 | 0,011 |
| 0,010 | 0,010 | 0,010 | 0,010 | 0,010 | 0,010 | 0,009 | 0,010 | 0,010 |
| 0,009 | 0,009 | 0,010 | 0,010 | 0,009 | 0,009 | 0,009 | 0,009 | 0,010 |
| 0,008 | 0,008 | 0,009 | 0,008 | 0,008 | 0,008 | 0,008 | 0,008 | 0,005 |
| 0,007 | 0,007 | 0,007 | 0,006 | 0,006 | 0,006 | 0,006 | 0,006 | 0,004 |
| 0,007 | 0,007 | 0,007 | 0,006 | 0,007 | 0,007 | 0,007 | 0,006 | 0,004 |
| 0,008 | 0,007 | 0,008 | 0,007 | 0,007 | 0,007 | 0,007 | 0,007 | 0,004 |
| 0,007 | 0,006 | 0,007 | 0,006 | 0,006 | 0,006 | 0,005 | 0,006 | 0,006 |
| 0,007 | 0,006 | 0,007 | 0,006 | 0,006 | 0,006 | 0,005 | 0,006 | 0,006 |
| 0,007 | 0,007 | 0,008 | 0,007 | 0,002 | 0,002 | 0,003 | 0,007 | 0,006 |
| 0,007 | 0,007 | 0,008 | 0,007 | 0,004 | 0,004 | 0,002 | 0,007 | 0,007 |
| 0,007 | 0,007 | 0,008 | 0,007 | 0,004 | 0,004 | 0,002 | 0,007 | 0,006 |
| 0,006 | 0,007 | 0,007 | 0,007 | 0,004 | 0,004 | 0,003 | 0,007 | 0,006 |
| 0,006 | 0,006 | 0,006 | 0,006 | 0,005 | 0,005 | 0,005 | 0,006 | 0,006 |
| 0,007 | 0,006 | 0,007 | 0,006 | 0,006 | 0,005 | 0,005 | 0,006 | 0,006 |
| 0,006 | 0,006 | 0,007 | 0,006 | 0,006 | 0,005 | 0,005 | 0,006 | 0,005 |
| 0,006 | 0,006 | 0,007 | 0,007 | 0,006 | 0,006 | 0,006 | 0,006 | 0,006 |
| 0,006 | 0,007 | 0,007 | 0,007 | 0,006 | 0,006 | 0,005 | 0,006 | 0,006 |
| 0,007 | 0,006 | 0,007 | 0,006 | 0,006 | 0,006 | 0,005 | 0,006 | 0,006 |
| 0,007 | 0,006 | 0,007 | 0,006 | 0,006 | 0,006 | 0,005 | 0,007 | 0,006 |
| 0,007 | 0,007 | 0,008 | 0,007 | 0,004 | 0,004 | 0,002 | 0,007 | 0,007 |
| 0,006 | 0,006 | 0,006 | 0,006 | 0,005 | 0,005 | 0,005 | 0,006 | 0,006 |
| 0,007 | 0,007 | 0,007 | 0,007 | 0,006 | 0,006 | 0,005 | 0,007 | 0,006 |
| 0,006 | 0,006 | 0,006 | 0,006 | 0,006 | 0,006 | 0,006 | 0,007 | 0,006 |
| 0,007 | 0,006 | 0,007 | 0,006 | 0,006 | 0,006 | 0,006 | 0,006 | 0,007 |
| 0,006 | 0,006 | 0,006 | 0,006 | 0,005 | 0,005 | 0,004 | 0,006 | 0,005 |
| 0,006 | 0,006 | 0,006 | 0,006 | 0,006 | 0,006 | 0,005 | 0,006 | 0,006 |
| 0,006 | 0,006 | 0,007 | 0,006 | 0,006 | 0,006 | 0,005 | 0,006 | 0,006 |
| 0,006 | 0,006 | 0,006 | 0,006 | 0,006 | 0,006 | 0,006 | 0,006 | 0,007 |
| 0,004 | 0,004 | 0,005 | 0,004 | 0,007 | 0,007 | 0,007 | 0,004 | 0,007 |

|       |       |       |       |       |       |       |       |       |
|-------|-------|-------|-------|-------|-------|-------|-------|-------|
| 0,005 | 0,005 | 0,006 | 0,006 | 0,007 | 0,007 | 0,007 | 0,005 | 0,007 |
| 0,005 | 0,004 | 0,004 | 0,005 | 0,008 | 0,007 | 0,007 | 0,004 | 0,006 |
| 0,004 | 0,004 | 0,004 | 0,004 | 0,007 | 0,007 | 0,006 | 0,003 | 0,006 |
| 0,005 | 0,005 | 0,002 | 0,005 | 0,008 | 0,008 | 0,007 | 0,004 | 0,006 |
| 0,005 | 0,005 | 0,005 | 0,005 | 0,008 | 0,008 | 0,007 | 0,006 | 0,007 |
| 0,004 | 0,004 | 0,005 | 0,004 | 0,007 | 0,007 | 0,007 | 0,004 | 0,006 |
| 0,005 | 0,004 | 0,005 | 0,005 | 0,007 | 0,007 | 0,007 | 0,005 | 0,007 |
| 0,006 | 0,006 | 0,006 | 0,006 | 0,007 | 0,007 | 0,007 | 0,006 | 0,007 |
| 0,005 | 0,004 | 0,004 | 0,004 | 0,007 | 0,007 | 0,007 | 0,003 | 0,007 |
| 0,005 | 0,004 | 0,004 | 0,004 | 0,007 | 0,007 | 0,007 | 0,003 | 0,006 |
| 0,005 | 0,005 | 0,005 | 0,005 | 0,008 | 0,008 | 0,007 | 0,005 | 0,007 |
| 0,005 | 0,005 | 0,005 | 0,005 | 0,008 | 0,007 | 0,007 | 0,003 | 0,007 |
| 0,005 | 0,004 | 0,004 | 0,004 | 0,007 | 0,007 | 0,006 | 0,003 | 0,006 |
| 0,006 | 0,006 | 0,006 | 0,006 | 0,007 | 0,007 | 0,007 | 0,006 | 0,007 |
| 0,005 | 0,004 | 0,004 | 0,005 | 0,008 | 0,007 | 0,007 | 0,004 | 0,006 |
| 0,005 | 0,005 | 0,006 | 0,005 | 0,008 | 0,008 | 0,008 | 0,006 | 0,007 |
| 0,006 | 0,005 | 0,005 | 0,006 | 0,008 | 0,008 | 0,008 | 0,006 | 0,007 |
| 0,005 | 0,005 | 0,006 | 0,006 | 0,008 | 0,008 | 0,008 | 0,005 | 0,008 |
| 0,006 | 0,006 | 0,006 | 0,005 | 0,008 | 0,008 | 0,008 | 0,006 | 0,007 |
| 0,006 | 0,005 | 0,006 | 0,006 | 0,008 | 0,008 | 0,007 | 0,006 | 0,007 |
| 0,005 | 0,006 | 0,006 | 0,006 | 0,007 | 0,008 | 0,007 | 0,006 | 0,007 |
| 0,004 | 0,004 | 0,004 | 0,005 | 0,007 | 0,007 | 0,007 | 0,004 | 0,006 |
|       | 0,004 | 0,005 | 0,005 | 0,008 | 0,007 | 0,007 | 0,004 | 0,007 |
| 0,044 |       | 0,005 | 0,005 | 0,007 | 0,007 | 0,007 | 0,004 | 0,006 |
| 0,081 | 0,069 |       | 0,005 | 0,008 | 0,008 | 0,007 | 0,004 | 0,007 |
| 0,070 | 0,056 | 0,076 |       | 0,007 | 0,007 | 0,007 | 0,004 | 0,007 |
| 0,127 | 0,121 | 0,130 | 0,131 |       | 0,001 | 0,004 | 0,007 | 0,006 |
| 0,127 | 0,121 | 0,130 | 0,131 | 0,002 |       | 0,003 | 0,007 | 0,006 |
| 0,113 | 0,110 | 0,121 | 0,119 | 0,040 | 0,040 |       | 0,007 | 0,006 |
| 0,068 | 0,059 | 0,054 | 0,066 | 0,130 | 0,129 | 0,119 |       | 0,007 |
| 0,139 | 0,126 | 0,136 | 0,136 | 0,136 | 0,136 | 0,129 | 0,134 |       |

Table S6: Lineages identified in this study as identical with others previously reported. On the left are the lineages, hosts and morphotypes determined in this study; on the right GenBank identification numbers, MalAvi names, and hosts previously reported in databases..

| This study |             |                                |                                           | Sequences previously reported |                         |                                              |
|------------|-------------|--------------------------------|-------------------------------------------|-------------------------------|-------------------------|----------------------------------------------|
| GenBank N° | Malavi Name | Parasite species               | Host                                      | GenBank N°                    | Parasite species        | Host species                                 |
| OL689176   | COLPAS03    | <i>H. paramultipigmentatus</i> | Columbiformes- <i>Columbina talpacoti</i> | MK264406                      | <i>Haemoproteus sp.</i> | Columbiformes - <i>Zenaida graysoni</i>      |
|            |             |                                |                                           | KU562204                      |                         | Columbiformes - <i>Columbina talpacoti</i>   |
|            |             |                                |                                           | JN788935                      |                         | Columbiformes - <i>Columbina passerina</i>   |
|            |             |                                |                                           | JN819391                      |                         | Passeriformes - <i>Automolus infuscatus</i>  |
|            |             |                                |                                           | HM222487                      |                         | Passeriformes - <i>Myiophobus fasciatus</i>  |
|            |             |                                |                                           |                               |                         | Passeriformes - <i>Cymbilaimus lineatus</i>  |
| OL689177   | COSQU01     | <i>Haemoproteus sp.</i>        | Columbiformes - <i>Claravis pretiosa</i>  |                               |                         | Passeriformes - <i>Lophotriccus galeatus</i> |
|            |             |                                |                                           | MH457280                      | <i>Haemoproteus sp.</i> | Columbiformes - <i>Columbina talpacoti</i>   |
|            |             |                                |                                           | JX029921                      |                         | Columbiformes - <i>Columbina squammata</i>   |
| KY653761   | HAECOL01    | <i>H. columbae</i>             | Columbiformes - <i>Columba livia</i>      |                               |                         | Columbiformes - <i>Scardafella squammata</i> |
|            |             |                                |                                           | MN369024                      | <i>H. columbae</i>      | Columbiformes - <i>Columba livia</i>         |
|            |             |                                |                                           | MN065204                      | <i>Haemoproteus sp.</i> | Passeriformes - <i>Alcippe poiocephala</i>   |
|            |             |                                |                                           | MN065190                      |                         | Passeriformes - <i>Garrulax delesserti</i>   |
|            |             |                                |                                           | KU131583                      |                         |                                              |
|            |             |                                |                                           | KJ152639                      |                         |                                              |
| KY653794   | TROAED20    | <i>H. witti</i>                | Apodiformes - <i>Eriocnemis derbyi</i>    | LC605998                      |                         |                                              |
|            |             |                                |                                           | KU364540                      | <i>H. witti</i>         | Apodiformes - <i>Adelomyia melanogenys</i>   |
|            |             |                                |                                           | JQ988492                      | <i>Haemoproteus sp</i>  | Apodiformes - <i>Aglaeactis castelnaudii</i> |
|            |             |                                |                                           | JQ988529                      |                         | Apodiformes - <i>Aglaeactis cupripennis</i>  |
|            |             |                                |                                           | JQ988563                      |                         | Apodiformes - <i>Aglaiocercus kingi</i>      |
|            |             |                                |                                           | JQ988744                      |                         | Apodiformes - <i>Amazilia alticola</i>       |
|            |             |                                |                                           | KC121053                      |                         | Apodiformes - <i>Amazilia chionogaster</i>   |
|            |             |                                |                                           | MK695445                      |                         | Apodiformes - <i>Amazilia viridicauda</i>    |
|            |             |                                |                                           | JQ988223                      |                         | Apodiformes - <i>Boissonneaua matthewsii</i> |
|            |             |                                |                                           | JQ988352                      |                         | Apodiformes - <i>Chalcostigma herrani</i>    |
|            |             |                                |                                           | JQ988210                      |                         | Apodiformes - <i>Chalcostigma stanleyi</i>   |

JQ988105

Apodiformes - *Coeligena coeligena*

JQ988109

Apodiformes - *Coeligena iris*

JQ988559

Apodiformes - *Coeligena torquata*

Apodiformes - *Coeligena violifer*

Apodiformes - *Colibri coruscans*

Apodiformes - *Colibri thalassinus*

Apodiformes - *Eriocnemis cupreovertris*

Apodiformes - *Eriocnemis derbyi*

Apodiformes - *Eriocnemis vestita*

Apodiformes - *Eutoxeres condamini*

Apodiformes - *Florisuga mellivora*

Apodiformes - *Glaucis hirsutus*

Apodiformes - *Helianthus amethysticollis*

Apodiformes - *Helianthus micraster*

Apodiformes - *Helianthus viola*

Apodiformes - *Heliodoxa leadbeateri*

Apodiformes - *Heliodoxa rubinoides*

Apodiformes - *Lafresnaya lafresnaya*

Apodiformes - *Lesbia victoriae*

Apodiformes - *Metallura eupogon*

Apodiformes - *Metallura phoebe*

Apodiformes - *Metallura tyrianthina*

Apodiformes - *Ocreatus underwoodii*

Apodiformes - *Oreotrochilus estella*

Apodiformes - *Oreotrochilus melanogaster*

Apodiformes - *Patagona gigas*

Apodiformes - *Phaethornis griseogularis*

Apodiformes - *Phaethornis guy*

Apodiformes - *Phaethornis hispidus*

Apodiformes - *Phaethornis malaris*

Apodiformes - *Phaethornis ruber*

Apodiformes - *Phaethornis syrmatorphorus*

Apodiformes - *Polyonymus caroli*

Apodiformes - *Pterophanes cyanopterus*



Apodiformes - *Schistes geoffroyi*  
Apodiformes - *Taphrospilus hypostictus*  
Apodiformes - *Thalurania furcata*  
Apodiformes - *Threnetes leucurus*  
Caprimulgiformes - *Caprimulgus longirostris*  
Coraciiformes - *Baryphthengus martii*  
Coraciiformes - *Electron platyrhynchum*  
Galbuliformes - *Bucco macrodactylus*  
Galbuliformes - *Monasa flavirostris*  
Galbuliformes - *Monasa nigrifrons*  
Passeriformes - *Alcippe poiocephala*  
Passeriformes - *Amblycercus holosericeus*  
Passeriformes - *Anairetes parulus*  
Passeriformes - *Basileuterus trifasciatus*  
Passeriformes - *Buarremon torquatus*  
Passeriformes - *Campylorhynchus fasciatus*  
Passeriformes - *Chlorochrysa calliparaea*  
Passeriformes - *Cinnycerthia unirufa*  
Passeriformes - *Cistothorus platensis*  
Passeriformes - *Conirostrum cinereum*  
Passeriformes - *Cranioleuca antisiensis*  
Passeriformes - *Cranioleuca marcapatae*  
Passeriformes - *Diglossa cyanea*  
Passeriformes - *Diglossopsis caerulea*  
Passeriformes - *Drymophila caudata*  
Passeriformes - *Elaenia albiceps*  
Passeriformes - *Elaenia pallatangae*  
Passeriformes - *Furnarius leucopus*  
Passeriformes - *Garrulax delesserti*  
Passeriformes - *Haplospiza rustica*  
Passeriformes - *Hellmayrea gularis*  
Passeriformes - *Hemipingus xanthophthalmus*  
Passeriformes - *Hemitriccus granadensis*  
Passeriformes - *Hypocnemis subflava*

Passeriformes - *Icterus mesomelas*  
Passeriformes - *Leiothlypis peregrina*  
Passeriformes - *Lepidocolaptes lacrymiger*  
Passeriformes - *Leptopogon taczanowskii*  
Passeriformes - *Lochmias nematura*  
Passeriformes - - *Lophotriccus pileatus*  
Passeriformes - *Microcerculus marginatus*  
Passeriformes - - *Mionectes oleagineus*  
Passeriformes - *Mionectes striaticollis*  
Passeriformes - *Myadestes ralloides*  
Passeriformes - *Myioborus miniatus*  
Passeriformes - *Myiothlypis coronata*  
Passeriformes - *Myiothlypis fraseri*  
Passeriformes - *Myiothlypis nigrocristata*  
Passeriformes - *Ochthoeca rufipectoralis*  
Passeriformes - *Pheugopedius eisenmanni*  
Passeriformes - *Pipreola riefferii*  
Passeriformes - *Pyriglena leuconota*  
Passeriformes - *Pyrrhomyias cinnamomeus*  
Passeriformes - *Scytalopus simonsi*  
Passeriformes - *Synallaxis azarae*  
Passeriformes - *Tangara chilensis*  
Passeriformes - *Tangara nigroviridis*  
Passeriformes - *Thamnomanes ardesiacus*  
Passeriformes - *Thraupis cyanocephala*  
Passeriformes - *Tiaris obscura*  
Passeriformes - *Troglodytes aedon*  
Passeriformes - *Turdus fuscater*  
Passeriformes - *Turdus nigriceps*  
Passeriformes - *Turdus serranus*  
Passeriformes - *Xiphorhynchus ocellatus*  
Piciformes - *Colaptes rupicola*

|          |          |                                        |                                              |          |                        |                                         |
|----------|----------|----------------------------------------|----------------------------------------------|----------|------------------------|-----------------------------------------|
| KJ592828 | DENAUT01 | <i>Hemoproteus<br/>macrovacuolatus</i> | Anseriformes - <i>Dendrocygna autumnalis</i> | KJ469133 | <i>Haemoproteus sp</i> | Charadriiformes - <i>Rynchops niger</i> |
|----------|----------|----------------------------------------|----------------------------------------------|----------|------------------------|-----------------------------------------|

|          |          |                                |                                            |          |                            |                                                    |
|----------|----------|--------------------------------|--------------------------------------------|----------|----------------------------|----------------------------------------------------|
| OP087641 | PSDIS01  | <i>Haemoproteus sp</i>         | Strigiformes - <i>Megascops choliba</i>    | KX068688 | <i>Haemoproteus sp</i>     | Diptera - <i>Psorophora discrucians</i>            |
|          |          |                                |                                            | KJ575554 | <i>Haemoproteus syrnii</i> | Strigiformes - <i>Megascops choliba</i>            |
|          |          |                                |                                            | MN136029 |                            | Passeriformes - <i>Poecilotriccus plumbeiceps</i>  |
| OP087643 | MONNIG02 | <i>Haemoproteus sp.</i>        | Piciformes - <i>Monasa nigrifrons</i>      | MG598390 | <i>Haemoproteus sp.</i>    | Piciformes - <i>Monasa nigrifrons</i>              |
| OP087648 | COPIC01  | <i>H. paramiltipigmentatus</i> | Columbiformes - <i>Columbina talpacoti</i> | MK981624 | <i>Haemoproteus sp.</i>    | Columbiformes - <i>Columbina picui</i>             |
|          |          |                                |                                            | MH457255 |                            | Columbiformes - <i>Columbina cruziana</i>          |
|          |          |                                |                                            | KP686106 |                            | Passeriformes - <i>Coryphospingus pileatus</i>     |
|          |          |                                |                                            |          |                            | Passeriformes - <i>Troglodytes aedon</i>           |
| OP087644 | DENPET03 | <i>P. nucleophilum</i>         | Apodiformes - <i>Glaucis hirsutus</i>      | JX467689 | <i>P. nucleophilum</i>     | Anseriformes - <i>Alopochen aegyptiacus</i>        |
|          |          |                                |                                            | JN819335 | <i>Plasmodium sp</i>       | Anseriformes - <i>Anas discors</i>                 |
|          |          |                                |                                            | DQ241530 |                            | Anseriformes - <i>Cygnus atratus</i>               |
|          |          |                                |                                            | HF543647 |                            | Anseriformes - <i>Netta erythrophthalma</i>        |
|          |          |                                |                                            | JX021474 |                            | Charadriiformes - <i>Rynchops niger</i>            |
|          |          |                                |                                            | KC867670 |                            | Galliformes - <i>Pipile jacutinga</i>              |
|          |          |                                |                                            | KU562435 |                            | Passeriformes - <i>Setophaga petechia</i>          |
|          |          |                                |                                            | KX887469 |                            | Passeriformes - <i>Vireo griseus</i>               |
|          |          |                                |                                            | KU562734 |                            | Passeriformes - <i>Volatinia jacarina</i>          |
|          |          |                                |                                            | KC867671 |                            | Passeriformes - <i>Cacicus cela</i>                |
|          |          |                                |                                            | KM365040 |                            | Passeriformes - <i>Cacicus haemorrhous</i>         |
|          |          |                                |                                            | KJ577723 |                            | Passeriformes - <i>Zonotrichia capensis</i>        |
|          |          |                                |                                            | KX159488 |                            | Passeriformes - <i>Craniolaeca pyrrhophia</i>      |
|          |          |                                |                                            | KX159489 |                            | Passeriformes - <i>Gnorimopsar chopi</i>           |
|          |          |                                |                                            | KU562464 |                            | Passeriformes - <i>Basileuterus culicivorus</i>    |
|          |          |                                |                                            |          |                            | Passeriformes - <i>Basileuterus leucoblepharus</i> |
|          |          |                                |                                            |          |                            | Passeriformes - <i>Geothlypis trichas</i>          |
|          |          |                                |                                            |          |                            | Passeriformes - <i>Passer domesticus</i>           |
|          |          |                                |                                            |          |                            | Passeriformes - <i>Basileuterus flaveolus</i>      |
|          |          |                                |                                            |          |                            | Passeriformes - <i>Thryothorus longirostris</i>    |
|          |          |                                |                                            |          |                            | Passeriformes - <i>Coereba flaveola</i>            |

Passeriformes - *Formicivora melanogaster*  
Passeriformes - *Pachyramphus polychopterus*  
Passeriformes - *Parula pitiayumi*  
Passeriformes - *Trichothraupis melanops*  
Passeriformes - *Turdus leucomelas*  
Passeriformes - *Turdus rufiventris*  
Passeriformes - *Dolichonyx oryzivorus*  
Passeriformes - *Riparia riparia*  
Passeriformes - *Petrochelidon pyrrhonota*  
Passeriformes - *Psarocolius decumanus*  
Passeriformes - *Ramphocelus carbo*  
Passeriformes - *Thamnophilus nigrocinereus*  
Passeriformes - *Hemithraupis guira*  
Passeriformes - *Cypsnagra hirundinacea*  
Passeriformes - *Mimus saturninus*  
Passeriformes - *Cacicus solitarius*  
Passeriformes - *Saltator coerulescens*  
Passeriformes - *Arremon taciturnus*  
Passeriformes - *Hypocnemis subflava*  
Passeriformes - *Automolus rufipileatus*  
Passeriformes - *Pipra fasciicauda*  
Passeriformes - *Turdus hauxwelli*  
Passeriformes - *Cyphorhinus arada*  
Passeriformes - *Xiphorhynchus ocellatus*  
Passeriformes - *Ammodramus humeralis*  
Passeriformes - *Coryphospingus pileatus*  
Passeriformes - *Dumetella carolinensis*  
Passeriformes - *Turdus migratorius*  
Passeriformes - *Cantorchilus longirostris*  
Passeriformes - *Cyclarhis gujanensis*  
Passeriformes - *Myiothlypis flaveola*  
Passeriformes - *Neothraupis fasciata*  
Passeriformes - *Synallaxis frontalis*

|          |         |                       |                                          |          |                       |                                                    |
|----------|---------|-----------------------|------------------------------------------|----------|-----------------------|----------------------------------------------------|
| OP087638 | SPMAG04 | <i>P. tejerai</i>     | Galbuliformes - <i>Galbula ruficauda</i> | MG192527 | <i>Plasmodium sp</i>  | Piciformes - <i>Malacoptila rufa</i>               |
|          |         |                       |                                          | MF953290 |                       | Sphenisciformes - <i>Spheniscus magellanicus</i>   |
|          |         |                       |                                          | KJ577729 |                       | Galbuliformes - <i>Galbula ruficauda</i>           |
|          |         |                       |                                          | KJ577727 |                       |                                                    |
| OP087637 | CYCYA01 | <i>Plasmodium sp.</i> | Gruiformes - <i>Porphyrio martinica</i>  | KU562328 | <i>Plasmodium sp</i>  | Columbiformes - <i>Geotrygon montana</i>           |
|          |         |                       |                                          | KU236432 |                       | Passeriformes - <i>Cyanocompsa cyanoides</i>       |
|          |         |                       |                                          | DQ241529 |                       | Passeriformes - <i>Dixiphia pipra</i>              |
|          |         |                       |                                          |          |                       | Passeriformes - <i>Hylexetastes perrotii</i>       |
|          |         |                       |                                          |          |                       | Passeriformes - <i>Hylocichla mustelina</i>        |
|          |         |                       |                                          |          |                       | Passeriformes - <i>Hypocnemis striata</i>          |
|          |         |                       |                                          |          |                       | Passeriformes - <i>Icterus cayanensis</i>          |
|          |         |                       |                                          |          |                       | Passeriformes - <i>Lepidothrix coeruleocapilla</i> |
|          |         |                       |                                          |          |                       | Passeriformes - <i>Lepidothrix coronata</i>        |
|          |         |                       |                                          |          |                       | Passeriformes - <i>Microbates collaris</i>         |
|          |         |                       |                                          |          |                       | Passeriformes - <i>Mionectes macconnelli</i>       |
|          |         |                       |                                          |          |                       | Passeriformes - <i>Myiarchus ferox</i>             |
|          |         |                       |                                          |          |                       | Passeriformes - <i>Myrmoborus myotherinus</i>      |
|          |         |                       |                                          |          |                       | Passeriformes - <i>Myrmornis torquata</i>          |
|          |         |                       |                                          |          |                       | Passeriformes - <i>Oporornis formosus</i>          |
|          |         |                       |                                          |          |                       | Passeriformes - <i>Pithys albifrons</i>            |
|          |         |                       |                                          |          |                       | Passeriformes - <i>Polioptila plumbea</i>          |
|          |         |                       |                                          |          |                       | Passeriformes - <i>Sclerurus caudacutus</i>        |
|          |         |                       |                                          |          |                       | Passeriformes - <i>Seiurus noveboracensis</i>      |
|          |         |                       |                                          |          |                       | Passeriformes - <i>Thamnomanes caesi</i>           |
|          |         |                       |                                          |          |                       | Passeriformes - <i>Thamnomanes saturninus</i>      |
| OP087639 | GRW06   | <i>P. elongatum</i>   | Gruiformes - <i>Porphyrio martinica</i>  | MK652238 | <i>P.elongatum</i>    | Anseriformes - <i>Anas discors</i>                 |
|          |         |                       |                                          | MF442563 | <i>Plasmodium sp.</i> | Anseriformes - <i>Coscoroba coscoroba</i>          |
|          |         |                       |                                          | MF953288 |                       | Anseriformes - <i>Cygnus atratus</i>               |
|          |         |                       |                                          | KY653802 |                       | Anseriformes - <i>Tadorna ferruginea</i>           |
|          |         |                       |                                          | KY653801 |                       | Apterygiformes - <i>Apteryx australis</i>          |
|          |         |                       |                                          | MF101820 |                       | Ciconiiformes - <i>Ardea herodias</i>              |
|          |         |                       |                                          | KU562666 |                       | Ciconiiformes - <i>Bubulcus ibis</i>               |

|          |                                                   |
|----------|---------------------------------------------------|
| MW023129 | Columbiformes - <i>Geotrygon montana</i>          |
| KJ488566 | Coraciiformes - <i>Alcedo atthis</i>              |
| JX276944 | Coraciiformes - <i>Merops apiaster</i>            |
| JN792172 | Falconiformes - <i>Accipitridae</i>               |
| GU252013 | Falconiformes - <i>Rostrhamus sociabilis</i>      |
| HM179160 | Galbuliformes - <i>Malacoptila striata</i>        |
| GQ395650 | Galliformes - <i>Pavo cristatus</i>               |
| GQ141570 | Gruiformes - <i>Crex crex</i>                     |
| EF380161 | Passeriformes - <i>Acrocephalus arundinaceus</i>  |
| HF543650 | Passeriformes - <i>Acrocephalus baeticatus</i>    |
| DQ659588 | Passeriformes - <i>Acrocephalus newtoni</i>       |
| MK690636 | Passeriformes - <i>Acrocephalus paludicola</i>    |
|          | Passeriformes - <i>Acrocephalus schoenobaenus</i> |
|          | Passeriformes - <i>Acrocephalus scirpaceus</i>    |
|          | Passeriformes - <i>Ailuroedus melanotis</i>       |
|          | Passeriformes - <i>Alcippe morrisonia</i>         |
|          | Passeriformes - <i>Andropadus milanjensis</i>     |
|          | Passeriformes - <i>Anthornis melanura</i>         |
|          | Passeriformes - <i>Anthus campestris</i>          |
|          | Passeriformes - <i>Basileuterus hypoleucus</i>    |
|          | Passeriformes - <i>Carpodacus mexicanus</i>       |
|          | Passeriformes - <i>Certhiidae</i>                 |
|          | Passeriformes - <i>Corvus corax</i>               |
|          | Passeriformes - <i>Corvus corone</i>              |
|          | Passeriformes - <i>Cracticus tibicen</i>          |
|          | Passeriformes - <i>Crateroscelis robusta</i>      |
|          | Passeriformes - <i>Crithagra rufobrunnea</i>      |
|          | Passeriformes - <i>Cyanistes caeruleus</i>        |
|          | Passeriformes - <i>Cyanomitra olivacea</i>        |
|          | Passeriformes - <i>Dendrocincla merula</i>        |
|          | Passeriformes - <i>Donacobius atricapilla</i>     |
|          | Passeriformes - <i>Emberiza citrinella</i>        |
|          | Passeriformes - <i>Emberiza melanocephala</i>     |
|          | Passeriformes - <i>Euplectes orix</i>             |

Passeriformes - *Fringilla coelebs*  
Passeriformes - *Fringillidae*  
Passeriformes - *Geothlypis trichas*  
Passeriformes - *Glyphorhynchus spirurus*  
Passeriformes - *Hippolais icterina*  
Passeriformes - *Linurgus olivaceus*  
Passeriformes - *Locustella luscinioides*  
Passeriformes - *Luscinia svecica*  
Passeriformes - *Melospiza melodia*  
Passeriformes - *Mohoua albicilla*  
Passeriformes - *Passer domesticus*  
Passeriformes - *Petroica australis*  
Passeriformes - *Petroica longipes*  
Passeriformes - *Philesturnus carunculatus*  
Passeriformes - *Phylloscopus humei*  
Passeriformes - *Ploceus melanogaster*  
Passeriformes - *Prunella modularis*  
Passeriformes - *Ptilonorhynchidae*  
Passeriformes - *Rimator malacoptilus*  
Passeriformes - *Sporophila americana*  
Passeriformes - *Stachyris nigriceps*  
Passeriformes - *Stachyris pyrrhops*  
Passeriformes - *Stachyris ruficeps*  
Passeriformes - *Sylvia atricapilla*  
Passeriformes - *Sylvia conspicillata*  
Passeriformes - *Passeriformes* - *Tachycineta bicolor*  
Passeriformes - *Troglodytes troglodytes*  
Passeriformes - *Passeriformes* - *Turdus albicollis*  
Passeriformes - *Turdus leucomelas*  
Passeriformes - *Turdus merula*  
Passeriformes - *Turdus philomelos*  
Passeriformes - *Zoothera gurneyi*  
Passeriformes - *Zosterops ficedulinus*  
Passeriformes *Zosterops lateralis*

|          |         |                   |                                                  |                      |                         |                                                                                                                                                                                                                                                                                          |
|----------|---------|-------------------|--------------------------------------------------|----------------------|-------------------------|------------------------------------------------------------------------------------------------------------------------------------------------------------------------------------------------------------------------------------------------------------------------------------------|
|          |         |                   |                                                  |                      |                         | Passeriformes - <i>Zosterops leucophaeus</i><br>Psittaciformes - <i>Cyanoramphus novaezelandiae</i><br>Psittaciformes - <i>Melopsittacus undulatus</i><br>Sphenisciformes - <i>Spheniscus magellanicus</i><br>Strigiformes - <i>Bubo scandiacus</i><br>Strigiformes - <i>Strix varia</i> |
| KF309189 | COHEL01 | <i>L. quynzae</i> | Apodiformes - <i>Coeligena helianthea</i>        | JQ988469<br>JQ988129 | <i>Leucocytozoon sp</i> | Apodiformes - <i>Metallura tyrianthina</i><br>Apodiformes - <i>Phaethornis hispidus</i><br>Apodiformes - <i>Polyonymus caroli</i><br>Passeriformes - <i>Premnornis guttuligera</i>                                                                                                       |
| KF479480 | HEAME01 | <i>L. quynzae</i> | Apodiformes - <i>Heliangelus amethysticollis</i> | JQ988510             | <i>Leucocytozoon sp</i> | Apodiformes - <i>Metallura tyrianthina</i><br>Passeriformes - <i>Elaenia albiceps</i><br>Apodiformes - <i>Aglaeactis castelnaudii</i><br>Passeriformes - <i>Mecocerculus stictopterus</i>                                                                                                |

---



Table S7: Database of papers reviewed for data compilation of Haemosporidian parasites infections in Neotropical birds, after 1978.

| References |                                                                                                                                                                                                                                                                                                                                                                                                                                                                                        |
|------------|----------------------------------------------------------------------------------------------------------------------------------------------------------------------------------------------------------------------------------------------------------------------------------------------------------------------------------------------------------------------------------------------------------------------------------------------------------------------------------------|
| 1.         | Abad, C.S.; Tellkamp, M.P.; Amaro, I.R.; Spencer, L.M. Incidence of Avian Malaria in Hummingbirds in Humid Premontane Forests of Pichincha Province, Ecuador: A Pilot Study. <i>Veterinary World</i> <b>2021</b> , <i>14</i> , 889. doi: 10.14202/vetworld.2021.889-896                                                                                                                                                                                                                |
| 2.         | Adriano, E.A.; Cordeiro, N.S. Prevalence and Intensity of <i>Haemoproteus columbae</i> in Three Species of Wild Doves from Brazil. <i>Memórias do Instituto Oswaldo Cruz</i> <b>2001</b> , <i>96</i> , 175–178. <a href="https://doi.org/10.1590/S0074-02762001000200007">https://doi.org/10.1590/S0074-02762001000200007</a>                                                                                                                                                          |
| 3.         | Alvarez-Londoño, J.; Cardona-Romero, M.; Martínez-Sánchez, E.T.; Ossa-López, P.A.; Pérez-Cárdenas, J.E.; Gonzalez, A.D.; Rivera-Páez, F.A.; Castaño-Villa, G.J. Avian Haemosporidian (Haemosporida: <i>Plasmodium</i> and <i>Haemoproteus</i> ) in the Department of Arauca, Colombian Orinoquia Region. <i>Parasitology Research</i> <b>2022</b> , <i>121</i> , 1775–1787, doi: <a href="https://doi.org/10.1007/s00436-022-07511-w">https://doi.org/10.1007/s00436-022-07511-w</a> . |
| 4.         | Andery, D. de A.; Ferreira Junior, F.; de Araújo, A.; Vilela, D. da R.; Marques, M.; Marin, S.; Horta, R.; Ortiz, M.; de Resende, J.; Martins, N. da S. Health Assessment of Raptors in Triage in Belo Horizonte, MG, Brazil. <i>Brazilian Journal of Poultry Science</i> <b>2013</b> , <i>15</i> , 247–256. <a href="https://doi.org/10.1590/S1516-635X2013000300012">https://doi.org/10.1590/S1516-635X2013000300012</a>                                                             |
| 5.         | Anjos, C.C.; Chagas, C.R.; Fecchio, A.; Schunck, F.; Costa-Nascimento, M.J.; Monteiro, E.F.; Mathias, B.S.; Bell, J.A.; Guimarães, L.O.; Comiche, K.J. Avian Malaria and Related Parasites from Resident and Migratory Birds in the Brazilian Atlantic Forest, with Description of a New <i>Haemoproteus</i> Species. <i>Pathogens</i> <b>2021</b> , <i>10</i> , 103, doi: <a href="https://doi.org/10.3390/pathogens10020103">https://doi.org/10.3390/pathogens10020103</a> .         |
| 6.         | Barino, G.T.M.; Rossi, M.F.; de Oliveira, L.; Reis Junior, J.L.; D’Agosto, M.; Dias, R.J.P. <i>Haemoproteus syrnii</i> (Haemosporida: Haemoproteidae) in Owls from Brazil: Morphological and Molecular Characterization, Potential Cryptic Species, and Exo-Erythrocytic Stages. <i>Parasitology Research</i> <b>2021</b> , <i>120</i> , 243–255, doi: <a href="https://doi.org/10.1007/s00436-020-06958-z">https://doi.org/10.1007/s00436-020-06958-z</a> .                           |
| 7.         | Basto, N.; Rodríguez, O.A.; Marinkelle, C.J.; Gutierrez, R.; Matta, N.E. Haematozoa in Birds from La Macarena National Natural Park (Colombia). <i>Caldasia</i> <b>2006</b> , <i>28</i> , 371–377.                                                                                                                                                                                                                                                                                     |
| 8.         | Bell, J.A.; González-Acuña, D.; Tkach, V.V. Haemosporidian Parasites of Chilean Ducks: The Importance of Biogeography and Nonpasserine Hosts. <i>The Journal of parasitology</i> <b>2020</b> , <i>106</i> , 211–220. <a href="https://doi.org/10.1645/19-130">https://doi.org/10.1645/19-130</a>                                                                                                                                                                                       |

- 
9. Belo, N.O.; Pinheiro, R.T.; Reis, E.S.; Ricklefs, R.E.; Braga, E.M. Prevalence and Lineage Diversity of Avian Haemosporidians from Three Distinct Cerrado Habitats in Brazil. *PLoS One* **2011**, *6*, e17654. <https://doi.org/10.1371/journal.pone.0017654>
  10. Bennett, G.F. *Haemoproteus gabaldoni* n. Sp.(Apicomplexa: Haemoproteidae) from the Muscovy Duck *Cairina Moschata* (Aves: Anatidae). *Systematic parasitology* **1993**, *25*, 119–123. <https://doi.org/10.1007/BF00009981>
  11. Bennett, G.F.; Witt, H.; White, E.M. Blood Parasites of Some Jamaican Birds. *Journal of Wildlife Diseases* **1980**, *16*, 29–38. <https://doi.org/10.7589/0090-3558-16.1.29>
  12. Bennett, G.F.; Gabaldon, A.; Ulloa, G. Avian Haemoproteidae. 17. The Haemoproteids of the Avian Family Cracidae (Galliformes); the Guans, Curassows and Chachalacas. *Canadian Journal of Zoology* **1982**, *60*, 3105–3112. <https://doi.org/10.1139/z82-394>
  13. Bennett, G.; Caines, J.; Whiteway, M. Avian Haemoproteidae. 20. The Haemoproteids of the Avian Families Apodidae (Swifts), Bucconidae (Puffbirds), and Indicatoridae (Honeyguides). *Canadian journal of zoology* **1986**, *64*, 766–770. <https://doi.org/10.1139/z86-113>
  14. Bennett, G.; Garvin, M.; Bates, J. Avian Hematozoa from East-Central Bolivia. *Journal of Parasitology* **1991**, *7*, 207–211.
  15. Bennett, G.F.; de Souza Lopes, O. Blood Parasites of Some Birds from São Paulo State, Brazil. *Memórias do Instituto Oswaldo Cruz* **1980**, *75*, 117–134. <https://doi.org/10.1590/S0074-02761980000100012>
  16. Bueno, M.G.; Lopez, R.P.G.; de Menezes, R.M.T.; de Jesus Costa-Nascimento, M.; de Castro Lima, G.F.M.; de Sousa Araújo, R.A.; Guida, F.J.V.; Kirchgatter, K. Identification of Plasmodium Relictum Causing Mortality in Penguins (Spheniscus Magellanicus) from São Paulo Zoo, Brazil. *Veterinary Parasitology* **2010**, *173*, 123–127.
  17. Carlson, J.S.; Martínez-Gómez, J.E.; Valkiūnas, G.; Loiseau, C.; Bell, D.A.; Sehgal, R.N. Diversity and Phylogenetic Relationships of Hemosporidian Parasites in Birds of Socorro Island, México, and Their Role in the Re-Introduction of the Socorro Dove (*Zenaida graysoni*). *The Journal of Parasitology* **2013**, *99*, 270–276. <https://doi.org/10.1645/GE-3206.1>
  18. Carvalho, A.M.; Ferreira, F.C.; Araújo, A.C.; Hirano, L.Q.L.; Paludo, G.R.; Braga, É.M. Molecular Detection of Leucocytozoon in Red-Legged Seriemas (Cariama Cristata), a Non-Migratory Bird Species in the Brazilian Cerrado. *Veterinary Parasitology: Regional Studies and Reports* **2022**, *31*, 100652, doi:<https://doi.org/10.1016/j.ijppaw.2022.02.009>.

- 
19. Cedrola, F.; Martinele, I.; Senra, M.V.X.; Furtado, E.J. de O.; Dias, R.J.P. Rediscovery of *Plasmodium (Huffia) huffi* (Apicomplexa, Haemosporida): A Lost Lineage from Toucans. *Parasitology Research* **2021**, *120*, 3287–3296. <https://doi.org/10.1007/s00436-021-07273-x>
  20. Cepeda, A.S.; Lotta-Arévalo, I.A.; Pinto-Osorio, D.F.; Macías-Zacipa, J.; Valkiūnas, G.; Barato, P.; Matta, N.E. The Experimental Characterization of Complete Life Cycle of *Haemoproteus columbae*, with Description of Natural Host-Parasite System to Study This Infection. *International Journal for Parasitology* **2019**, *49*, 975–984, doi:<https://doi.org/10.1016/j.ijpara.2019.07.003>.
  21. Chagas, C.R.F.; Valkiūnas, G.; Nery, C.V.C.; Henrique, P.C.; Gonzalez, I.H.L.; Monteiro, E.F.; de Oliveira Guimarães, L.; Romano, C.M.; Kirchgatter, K. *Plasmodium (Novyella) nucleophilum* from an Egyptian Goose in São Paulo Zoo, Brazil: Microscopic Confirmation and Molecular Characterization. *International Journal for Parasitology: Parasites and Wildlife* **2013**, *2*, 286–291. <https://doi.org/10.1016/j.ijppaw.2013.09.008>
  22. Chagas, C.R.F.; de Oliveira Guimarães, L.; Monteiro, E.F.; Valkiūnas, G.; Katayama, M.V.; Santos, S.V.; Guida, F.J.V.; Simões, R.F.; Kirchgatter, K. Hemosporidian Parasites of Free-Living Birds in the São Paulo Zoo, Brazil. *Parasitology research* **2016**, *115*, 1443–1452. <https://doi.org/10.1007/s00436-015-4878-0>
  23. Chagas, C.R.F.; Valkiūnas, G.; de Oliveira Guimarães, L.; Monteiro, E.F.; Guida, F.J.V.; Simões, R.F.; Rodrigues, P.T.; de Albuquerque Luna, E.J.; Kirchgatter, K. Diversity and Distribution of Avian Malaria and Related Haemosporidian Parasites in Captive Birds from a Brazilian Megalopolis. *Malaria journal* **2017**, *16*, 1–20, doi:<https://doi.org/10.1186/s12936-017-1729-8>.
  24. Chahad-Ehlers, S.; Fushita, A.T.; Lacorte, G.A.; Assis, P.C.P. de; Del Lama, S.N. Effects of Habitat Suitability for Vectors, Environmental Factors and Host Characteristics on the Spatial Distribution of the Diversity and Prevalence of Haemosporidians in Waterbirds from Three Brazilian Wetlands. *Parasites & vectors* **2018**, *11*, 1–12. <https://doi.org/10.1186/s13071-018-2847-z>
  25. Coral, A.A.; Valkiūnas, G.; González, A.D.; Matta, N.E. In Vitro Development of *Haemoproteus columbae* (Haemosporida: Haemoproteidae), with Perspectives for Genomic Studies of Avian Haemosporidian Parasites. *Experimental parasitology* **2015**, *157*, 163–169. <https://doi.org/10.1016/j.exppara.2015.08.003>

- 
26. de Aguiar, L.M.; Júnior, O.M. Haemoparasites in Captive Birds at Uberlândia Zoo, State of Minas Gerais, Brazil. *Bioscience Journal* **2021**, *37*, 1981–3163. <https://doi.org/10.14393/BJ-v37n0a2021-47818>
  27. de Angeli Dutra, D.; Tolesano-Pascoli, G.; Garcia, F.I.; Biancalana, R.; Braga, É.M. First Record of Haemosporidian Parasites Infecting Swifts (Aves: Apodidae). *Acta tropica* **2019**, *197*, 105070. <https://doi.org/10.1016/j.actatropica.2019.105070>
  28. de Angeli Dutra, D.; Belo, N.; Braga, E.M. Prevalence and Richness of Malaria and Malaria-like Parasites in Wild Birds from Different Biomes in South America. *PeerJ* **2022**, *10*, e13485. <https://doi.org/10.7717/peerj.13485>
  29. Duarte-Moreno, A.N.; Villamizar-Escalante, D.; Rondón-González, F. PCR Detection of *Haemoproteus archiloachus* in Rufous-Tailed Hummingbird *Amazilia tzacatl* (Trochilidae) in Colombia. *Acta Biológica Colombiana* **2022**, *27*, 140–143, doi:<https://doi.org/10.15446/abc.v27n1.89162>.
  30. Durrant, K.L.; Beadell, J.S.; Ishtiaq, F.; Graves, G.R.; Olson, S.L.; Gering, E.; Peirce, M.A.; Milensky, C.M.; Schmidt, B.K.; Gebhard, C. Avian Hematozoa in South America: A Comparison of Temperate and Tropical Zones. *Ornithological Monographs* **2006**, *98*–111, doi:<https://doi.org/10.2307/40166831>.
  31. Elisei, C.; Souza, P.C.; Massard, C.L.; Soares, C.O. Caracterización Morfológica y Morfométrica de *Plasmodium juxtannucleare* (Apicomplexa: Plasmodiidae). *Parasitologia al día* **2001**, *25*, 12–18. <http://dx.doi.org/10.4067/S0716-07202001000100003>
  32. Elisei, C.; Fernandes, K.; Forlano, M.D.; Madureira, R.C.; Scofield, A.; Yotoko, K.S.; Soares, C.O.; Araújo, F.R.; Massard, C.L. Morphology and Morphometry of Three *Plasmodium juxtannucleare* (Apicomplexa: Plasmodiidae) Isolates. *Revista Brasileira de Parasitologia Veterinária* **2007**, *16*, 139–144. <https://doi.org/10.1590/S1984-29612007000300005>
  33. Fecchio, A.; Lima, M.R.; Silveira, P.; Braga, É.M.; Marini, M.Â. High Prevalence of Blood Parasites in Social Birds from a Neotropical Savanna in Brazil. *Emu* **2011**, *111*, 132–138. <https://doi.org/10.1071/MU10063>
  34. Fecchio, A.; Lima, M.R.; Svensson-Coelho, M.; Marini, M. Angelo; Ricklefs, R.E. Structure and Organization of an Avian Haemosporidian Assemblage in a Neotropical Savanna in Brazil. *Parasitology* **2013**, *140*, 181–192, doi:10.1017/S0031182012001412.

- 
35. Fecchio, A.; Ellis, V.A.; Bell, J.A.; Andretti, C.B.; D'horta, F.M.; Silva, A.M.; Tkach, V.V.; Weckstein, J.D. Avian Malaria, Ecological Host Traits and Mosquito Abundance in Southeastern Amazonia. *Parasitology* **2017**, *144*, 1117–1132, doi:<https://doi.org/10.1017/S003118201700035X>.
  36. Fecchio, A.; Bell, J.A.; Collins, M.D.; Farias, I.P.; Trisos, C.H.; Tobias, J.A.; Tkach, V.V.; Weckstein, J.D.; Ricklefs, R.E.; Batalha-Filho, H. Diversification by Host Switching and Dispersal Shaped the Diversity and Distribution of Avian Malaria Parasites in Amazonia. *Oikos* **2018**, *127*, 1233–1242. <https://doi.org/10.1111/oik.05115>
  37. Fecchio, A.; Wells, K.; Bell, J.A.; Tkach, V.V.; Lutz, H.L.; Weckstein, J.D.; Clegg, S.M.; Clark, N.J. Climate Variation Influences Host Specificity in Avian Malaria Parasites. *Ecology letters* **2019**, *22*, 547–557. <https://doi.org/10.1111/ele.13215>
  38. Fecchio, A.; Bell, J.A.; Pinheiro, R.B.; Cueto, V.R.; Gorosito, C.A.; Lutz, H.L.; Gaiotti, M.G.; Paiva, L.V.; França, L.F.; Toledo-Lima, G. Avian Host Composition, Local Speciation, and Dispersal Drive the Regional Assembly of Avian Malaria Parasites in South American Birds. *Molecular ecology* **2019**, *28*, 2681–2693 doi:<https://doi.org/10.1111/mec.15094>.
  39. Fecchio, A.; Collins, M.D.; Bell, J.A.; García-Trejo, E.A.; Sánchez-González, L.A.; Dispoto, J.H.; Rice, N.H.; Weckstein, J.D. Bird Tissues from Museum Collections Are Reliable for Assessing Avian Haemosporidian Diversity. *Journal of Parasitology* **2019**, *105*, 446–453. <https://doi.org/10.1645/18-130>
  40. Fecchio, A.; Bell, J.A.; Bosholn, M.; Vaughan, J.A.; Tkach, V.V.; Lutz, H.L.; Cueto, V.R.; Gorosito, C.A.; González-Acuña, D.; Stromlund, C. An Inverse Latitudinal Gradient in Infection Probability and Phylogenetic Diversity for *Leucocytozoon* Blood Parasites in New World Birds. *Journal of Animal Ecology* **2020**, *89*, 423–435. <https://doi.org/10.1111/1365-2656.13117>
  41. Fecchio, A.; Lima, M.R.; Bell, J.A.; Schunck, F.; Corrêa, A.H.; Beco, R.; Jahn, A.E.; Fontana, C.S.; da Silva, T.W.; Repenning, M. Loss of Forest Cover and Host Functional Diversity Increases Prevalence of Avian Malaria Parasites in the Atlantic Forest. *International Journal for Parasitology* **2021**, *51*, 719–728 <https://doi.org/10.1016/j.ijpara.2021.01.001>
  42. Fecchio, A.; Dias, R.I.; Ferreira, T.V.; Reyes, A.O.; Dispoto, J.H.; Weckstein, J.D.; Bell, J.A.; Tkach, V.V.; Pinho, J.B. Host Foraging Behavior and Nest Type Influence Prevalence of Avian Haemosporidian Parasites in the Pantanal. *Parasitology Research* **2022**, *121*, 1407–1417. <https://doi.org/10.1007/s00436-022-07453-3>

- 
43. Ferreira Junior, F.C.; Rodrigues, R.A.; Ellis, V.A.; Leite, L.O.; Borges, M.A.; Braga, E.M. Habitat Modification and Seasonality Influence Avian Haemosporidian Parasite Distributions in Southeastern Brazil. *PLoS One* **2017**, *12*, e0178791. <https://doi.org/10.1371/journal.pone.0178791>
  44. Ferreira-Junior, F.C.; de Angeli Dutra, D.; Martins, N.R.; Valkiūnas, G.; Braga, É.M. *Haemoproteus paraortalidum* n. Sp. in Captive Black-Fronted Piping-Guans *Aburria jacutinga* (Galliformes, Cracidae): High Prevalence in a Population Reintroduced into the Wild. *Acta tropica* **2018**, *188*, 93–100. <https://doi.org/10.1016/j.actatropica.2018.08.035>
  45. Ferreira-Junior, F.C.; de Angeli Dutra, D.; Silveira, P.; Pacheco, R.C.; Witter, R.; de Souza Ramos, D.G.; Pacheco, M.A.; Escalante, A.A.; Braga, É.M. A New Pathogen Spillover from Domestic to Wild Animals: *Plasmodium juxtannucleare* Infects Free-Living Passerines in Brazil. *Parasitology* **2018**, *145*, 1949–1958. <https://doi.org/10.1017/S003118201800077X>
  46. Gabaldon, A.; Ulloa, G. Holoendemicity of Malaria: An Avian Model. *Transactions of the Royal Society of Tropical Medicine and Hygiene* **1980**, *74*, 501–507.
  47. Gabaldon, A.; Ulloa, G.; Zerpa, N. *Fallisia (Plasmodioides) neotropicalis* Subgen. Nov. Sp. Nov. from Venezuela. *Parasitology* **1985**, *90*, 217–225, doi:<https://doi.org/10.1017/S0031182000050927>.
  48. Galen, S.C.; Witt, C.C. unpublished data.
  49. Garcia-Longoria, L.; Muriel, J.; Magallanes, S.; Villa-Galarce, Z.H.; Ricopa, L.; Inga-Díaz, W.G.; Fong, E.; Vecco, D.; Guerra-Saldaña, C.; Salas-Rengifo, T. Diversity and Host Assemblage of Avian Haemosporidians in Different Terrestrial Ecoregions of Peru. *Current zoology* **2022**, *68*, 27–40. <https://doi.org/10.1093/cz/zoab030>
  50. Gonzalez-Quevedo, C.; Davies, R.G.; Richardson, D.S. Predictors of Malaria Infection in a Wild Bird Population: Landscape-level Analyses Reveal Climatic and Anthropogenic Factors. *Journal of animal ecology* **2014**, *83*, 1091–1102. <https://doi.org/10.1111/1365-2656.12214>
  51. González, A.D.; Lotta, I.A.; García, L.F.; Moncada, L.I.; Matta, N.E. Avian Haemosporidians from Neotropical Highlands: Evidence from Morphological and Molecular Data. *Parasitology international* **2015**, *64*, 48–59, doi:<https://doi.org/10.1016/j.parint.2015.01.007>.
  52. González, A.D.; Lotta-Arevalo, I.; Fuentes, G.A.; Macías-Zacipa, J.; Acevedo-Cendales, L.D.; Matta, N.E. *Haemoproteus* Gabaldoni a Valid Species? An Approach from

---

Morphology and Molecular Tools Applied to Parasites of Anseriformes. *Acta Tropica* **2022**, 106540, doi:<https://doi.org/10.1016/j.actatropica.2022.106540>.

53. González-Olvera, M.; Hernández-Colina, A.; Santiago-Alarcon, D.; Osorio-Beristain, M.; Martínez-Maya, J.J. Blood-Parasites (Haemosporida) of Wild Birds Captured at Different Land Uses within a Tropical Seasonal Dry Forest Matrix. *Acta Zoológica Mexicana (NS)* **2022**, 38, 1–22. <https://doi.org/10.21829/azm.2022.3812425>
54. Harrigan, R.J.; Sedano, R.; Chasar, A.C.; Chaves, J.A.; Nguyen, J.T.; Whitaker, A.; Smith, T.B. New Host and Lineage Diversity of Avian Haemosporidia in the Northern Andes. *Evolutionary applications* **2014**, 7, 799–811, doi:<https://doi.org/10.1111/eva.12176>.
55. Lacorte, G.A.; Felix, G.M.; Pinheiro, R.R.; Chaves, A.V.; Almeida-Neto, G.; Neves, F.S.; Leite, L.O.; Santos, F.R.; Braga, E.M. Exploring the Diversity and Distribution of Neotropical Avian Malaria Parasites—a Molecular Survey from Southeast Brazil. *PLoS One* **2013**, 8, e57770.
56. Latta, S.C.; Ricklefs, R.E. Prevalence Patterns of Avian Haemosporida on Hispaniola. *Journal of Avian Biology* **2010**, 41, 25–33. <https://doi.org/10.1111/j.1600-048X.2009.04685.x>
57. Levin, I.I.; Outlaw, D.C.; Vargas, F.H.; Parker, P.G. *Plasmodium* Blood Parasite Found in Endangered Galapagos Penguins (*Spheniscus mendiculus*). *Biological Conservation* **2009**, 142, 3191–3195. <https://doi.org/10.1016/j.biocon.2009.06.017>
58. Levin, I.I.; Valkiūnas, G.; Santiago-Alarcon, D.; Cruz, L.L.; Iezhova, T.A.; O'Brien, S.L.; Hailer, F.; Dearborn, D.; Schreiber, E.; Fleischer, R.C. Hippoboscids-Transmitted *Haemoproteus* Parasites (Haemosporida) Infect Galapagos Pelecaniform Birds: Evidence from Molecular and Morphological Studies, with a Description of *Haemoproteus iwa*. *International Journal for Parasitology* **2011**, 41, 1019–1027. <https://doi.org/10.1016/j.ijpara.2011.03.014>
59. Levin, I.I.; Valkiūnas, G.; Iezhova, T.A.; O'Brien, S.L.; Parker, P.G. Novel *Haemoproteus* Species (Haemosporida: Haemoproteidae) from the Swallow-Tailed Gull (Lariidae), with Remarks on the Host Range of Hippoboscids-Transmitted Avian Hemoproteids. *The Journal of parasitology* **2012**, 98, 847–854. <https://doi.org/10.1645/GE-3007.1>
60. Londoño, A.; Pulgarin-R, P.C.; Blair, S. Blood Parasites in Birds from the Lowlands of Northern Colombia. *Caribbean Journal of Science* **2007**, 43, 87–93. <https://doi.org/10.18475/cjos.v43i1.a8>
61. Lotta, I.A.; Pacheco, M.A.; Escalante, A.A.; González, A.D.; Mantilla, J.S.; Moncada, L.I.; Adler, P.H.; Matta, N.E. *Leucocytozoon* Diversity and Possible Vectors in the

---

Neotropical Highlands of Colombia. *Protist* **2016**, *167*, 185–204,  
doi:<https://doi.org/10.1016/j.protis.2016.02.002>.

62. Lotta, I.A.; Valkiūnas, G.; Pacheco, M.A.; Escalante, A.A.; Hernández, S.R.; Matta, N.E. Disentangling *Leucocytozoon* Parasite Diversity in the Neotropics: Descriptions of Two New Species and Shortcomings of Molecular Diagnostics for Leucocytozoids. *International Journal for Parasitology: Parasites and Wildlife* **2019**, *9*, 159–173, doi:<https://doi.org/10.1016/j.ijppaw.2019.05.002>.
63. Martínez, J.; Vásquez, R.A.; Marqués, A.; Díez-Fernández, A.; Merino, S. The Prevalence and Molecular Characterisation of Blood Parasites Infecting the Vulnerable Tamarugo Conebill (*Conirostrum tamarugense*) and Other Birds in the Pampa Del Tamarugal, Chile. *Emu* **2016**, *116*, 310–314. <https://doi.org/10.1071/MU15090>
64. Marzal, A.; García-Longoria, L.; Cárdenas Callirgos, J.; Sehgal, R. Invasive Avian Malaria as an Emerging Parasitic Disease in Native Birds of Peru. *Biological invasions* **2015**, *17*, 39–45, doi:<https://doi.org/10.1007/s10530-014-0718-x>.
65. Marzal, A. unpublished data
66. Matoso, R.V.; Cedrola, F.; Barino, G.T.M.; Dias, R.J.P.; Rossi, M.F.; D'Agosto, M. New Morphological and Molecular Data for *Haemoproteus (H.) paramultipigmentatus* in the Atlantic Forest of Brazil. *Parasitology International* **2021**, *84*, 102375, doi:<https://doi.org/10.1016/j.parint.2021.102375>.
67. Matta, N.E.; Lotta, I.A.; Valkiūnas, G.; González, A.D.; Pacheco, M.A.; Escalante, A.A.; Moncada, L.I.; Rodríguez-Fandiño, O.A. Description of *Leucocytozoon quynzae* Sp. Nov. (Haemosporida, Leucocytozoidae) from Hummingbirds, with Remarks on Distribution and Possible Vectors of Leucocytozoids in South America. *Parasitology research* **2014**, *113*, 457–468, doi:<https://doi.org/10.1007/s00436-013-3675-x>.
68. Matta, N.E.; Pacheco, M.A.; Escalante, A.A.; Valkiūnas, G.; Ayerbe-Quñones, F.; Acevedo-Cendales, L.D. Description and Molecular Characterization of *Haemoproteus macrovacuolatus* n. Sp. (Haemosporida, Haemoproteidae), a Morphologically Unique Blood Parasite of Black-Bellied Whistling Duck (*Dendrocygna autumnalis*) from South America. *Parasitology research* **2014**, *113*, 2991–3000, doi:<https://doi.org/10.1007/BF00009981>.
69. McNew, S.M.; Barrow, L.N.; Williamson, J.L.; Galen, S.C.; Skeen, H.R.; DuBay, S.G.; Gaffney, A.M.; Johnson, A.B.; Bautista, E.; Ordoñez, P. Contrasting Drivers of Diversity in Hosts and Parasites across the Tropical Andes. *Proceedings of the National*



70. Merino, S.; Moreno, J.; Vásquez, R.A.; Martínez, J.; Sánchez-Monsálvez, I.; Estades, C.F.; Ippi, S.; Sabat, P.; Rozzi, R.; McGehee, S. Haematozoa in Forest Birds from Southern Chile: Latitudinal Gradients in Prevalence and Parasite Lineage Richness. *Austral Ecology* **2008**, *33*, 329–340. <https://doi.org/10.1111/j.1442-9993.2008.01820.x>
71. Merino, S.; Hennicke, J.; Martínez, J.; Ludynia, K.; Torres, R.; Work, T.M.; Stroud, S.; Masello, J.F.; Quillfeldt, P. Infection by *Haemoproteus* Parasites in Four Species of Frigatebirds and the Description of a New Species of *Haemoproteus* (Haemosporida: Haemoproteidae). *Journal of Parasitology* **2012**, *98*, 388–397. <https://doi.org/10.1645/GE-2415.1>
72. Mijares, A.; Rosales, R.; Silva-Iturriza, A. Hemosporidian Parasites in Forest Birds from Venezuela: Genetic Lineage Analyses. *Avian Diseases* **2012**, *56*, 583–588. <https://doi.org/10.1637/10058-011312-ResNote.1>
73. Moens, M.A.; Pérez-Tris, J. Discovering Potential Sources of Emerging Pathogens: South America Is a Reservoir of Generalist Avian Blood Parasites. *International Journal for Parasitology* **2016**, *46*, 41–49. <https://doi.org/10.1016/j.ijpara.2015.08.001>
74. Moens, M.A.; Valkiūnas, G.; Paca, A.; Bonaccorso, E.; Aguirre, N.; Pérez-Tris, J. Parasite Specialization in a Unique Habitat: Hummingbirds as Reservoirs of Generalist Blood Parasites of Andean Birds. *Journal of Animal Ecology* **2016**, *85*, 1234–1245. <https://doi.org/10.1111/1365-2656.12550>
75. Morel, A.P.; Webster, A.; Prusch, F.; Anicet, M.; Marsicano, G.; Trainini, G.; Stocker, J.; Giani, D.; Bandarra, P.M.; da Rocha, M.I.S. Molecular Detection and Phylogenetic Relationship of Haemosporida Parasites in Free-Ranging Wild Raptors from Brazil. *Veterinary Parasitology: Regional Studies and Reports* **2021**, *23*, 100521. <https://doi.org/10.1016/j.vprsr.2020.100521>
76. Motta, R.O.C.; Marques, M.V.R.; Junior, F.C.F.; de Assis Andery, D.; Horta, R.S.; Peixoto, R.B.; Lacorte, G.A.; de Abreu Moreira, P.; Leme, F. de O.P.; Melo, M.M. Does Haemosporidian Infection Affect Hematological and Biochemical Profiles of the Endangered Black-Fronted Piping-Guan (*Aburria jacutinga*)? *PeerJ* **2013**, *1*, e45. <https://doi.org/10.7717/peerj.45>
77. Pacheco, M.A.; Matta, N.E.; Valkiūnas, G.; Parker, P.G.; Mello, B.; Stanley Jr, C.E.; Lentino, M.; Garcia-Amado, M.A.; Cranfield, M.; Kosakovsky Pond, S.L. Mode and Rate of Evolution of Haemosporidian Mitochondrial Genomes: Timing the Radiation of

---

Avian Parasites. *Molecular biology and evolution* **2018**, *35*, 383–403, doi:<https://doi.org/10.1093/molbev/msx285>.

78. Pacheco, M.A.; García-Amado, M.A.; Manzano, J.; Matta, N.E.; Escalante, A.A. Blood Parasites Infecting the Hoatzin (*Opisthocomus hoazin*), a Unique Neotropical Folivorous Bird. *PeerJ* **2019**, *7*, e6361, doi:<https://doi.org/10.7717/peerj.6361>.
79. Perkins, S.L.; Schall, J. A Molecular Phylogeny of Malarial Parasites Recovered from Cytochrome b Gene Sequences. *Journal of Parasitology* **2002**, *88*, 972–978. [https://doi.org/10.1645/0022-3395\(2002\)088\[0972:AMPOMP\]2.0.CO;2](https://doi.org/10.1645/0022-3395(2002)088[0972:AMPOMP]2.0.CO;2)
80. Quillfeldt, P.; Martínez, J.; Hennicke, J.; Ludynia, K.; Gladbach, A.; Masello, J.F.; Riou, S.; Merino, S. Hemosporidian Blood Parasites in Seabirds—a Comparative Genetic Study of Species from Antarctic to Tropical Habitats. *Naturwissenschaften* **2010**, *97*, 809–817. <https://doi.org/10.1007/s00114-010-0698-3>
81. Quillfeldt, P.; Martinez, J.; Bugoni, L.; Mancini, P.L.; Merino, S. Blood Parasites in Noddies and Boobies from Brazilian Offshore Islands—Differences between Species and Influence of Nesting Habitat. *Parasitology* **2014**, *141*, 399–410. <https://doi.org/10.1017/S0031182013001649>
82. Rodrigues, P.; Navarrete, C.; Campos, E.; Verdugo, C. Low Occurrence of Hemosporidian Parasites in the Neotropic Cormorant (*Phalacrocorax brasilianus*) in Chile. *Parasitology research* **2019**, *118*, 325–333. <https://doi.org/10.1007/s00436-018-6146-6>
83. Rodríguez, O.A.; Moya, H.; Matta, N.E. Avian Blood Parasites in the National Natural Park Chingaza: High Andes of Colombia. *Hornero* **2009**, *24*, 1–6.
84. Rodríguez, O.A.; Matta, N.E. Blood Parasites in Some Birds from Eastern Plains of Colombia. *Memorias do Instituto Oswaldo Cruz* **2001**, *96*, 1173–1176, doi:<https://doi.org/10.1590/S0074-02762001000800026>.
85. Roos, F.; Belo, N.; Silveira, P.; Braga, E. Prevalence and Diversity of Avian Malaria Parasites in Migratory Black Skimmers (*Rynchops niger*, Laridae, Charadriiformes) from the Brazilian Amazon Basin. *Parasitology research* **2015**, *114*, 3903–3911. <https://doi.org/10.1007/s00436-015-4622-9>
86. Sacchi, A.B.V.; André, M.R.; Calchi, A.C.; de Santi, M.; Guimarães, A.; Pires, J.R.; Baldani, C.D.; Werther, K.; Machado, R.Z. Molecular and Serological Detection of Arthropod-Borne Pathogens in Carnivorous Birds from Brazil. *Veterinary Parasitology: Regional Studies and Reports* **2021**, *23*, 100539. <https://doi.org/10.1016/j.vprsr.2021.100539>

- 
87. Sallaberry-Pincheira, N.; Gonzalez-Acuña, D.; Herrera-Tello, Y.; Dantas, G.P.; Luna-Jorquera, G.; Frere, E.; Valdés-Velasquez, A.; Simeone, A.; Vianna, J.A. Molecular Epidemiology of Avian Malaria in Wild Breeding Colonies of Humboldt and Magellanic Penguins in South America. *EcoHealth* **2015**, *12*, 267–277. <https://doi.org/10.1007/s10393-014-0995-y>
  88. Santiago-Alarcon, D.; Whiteman, N.K.; Parker, P.G.; Ricklefs, R.E.; Valkiūnas, G. Patterns of Parasite Abundance and Distribution in Island Populations of Galápagos Endemic Birds. *Journal of Parasitology* **2008**, *94*, 584–590. <https://doi.org/10.1645/GE-1351.1>
  89. Santiago-Alarcon, D.; Outlaw, D.C.; Ricklefs, R.E.; Parker, P.G. Phylogenetic Relationships of Haemosporidian Parasites in New World Columbiformes, with Emphasis on the Endemic Galapagos Dove. *International Journal for Parasitology* **2010**, *40*, 463–470. <https://doi.org/10.1016/j.ijpara.2009.10.003>
  90. Sedano-Cruz, R.; Castillo, A.; Gil-Vargas, D.L. Molecular Identification of Haemosporidia in Avian Endemics of Gorgona Island within a Context for the Eastern Tropical Pacific Region. *Infection, Genetics and Evolution* **2020**, *78*, 104123. <https://doi.org/10.1016/j.meegid.2019.104123>
  91. Silva-Sánchez, C.; Arévalo, C.; Vilorio, N.; Romero Palmera, J. Prevalence of Hemoparasites in Wild Birds, in the Eastern Zone of the Falcon State, Venezuela 2013-2015. *Boletín de Malariología y Salud Ambiental* **2016**, *56*, 172–184.
  92. Silveira, P.; Belo, N.O.; Lacorte, G.A.; Kolesnikovas, C.K.; Vanstreels, R.E.; Steindel, M.; Catão-Dias, J.L.; Valkiūnas, G.; Braga, E.M. Parasitological and New Molecular-Phylogenetic Characterization of the Malaria Parasite *Plasmodium Tejerai* in South American Penguins. *Parasitology international* **2013**, *62*, 165–171, doi:<https://doi.org/10.1016/j.parint.2012.12.004>.
  93. Smith, M.J.; Ramey, A. Prevalence and Genetic Diversity of Haematozoa in South American Waterfowl and Evidence for Intercontinental Redistribution of Parasites by Migratory Birds. *International Journal for Parasitology: Parasites and Wildlife* **2015**, *4*, 22–28, doi:<https://doi.org/10.1016/j.ijppaw.2014.12.007>.
  94. Soares, L.; Escudero, G.; Penha, V.A.; Ricklefs, R.E. Low Prevalence of Haemosporidian Parasites in Shorebirds. *Ardea* **2016**, *104*, 129–141. <https://doi.org/10.5253/arde.v104i2.a8>

- 
95. Sousa, O.K.; Herman, C.M. Blood parasites of birds from Chiriqui and Panama provinces in the republic of Panama. *Journal of Wildlife Diseases* **1982**, *18*, 205–221, doi:10.7589/0090-3558-18.2.205.
  96. Svensson, M.; Ricklefs, R.E. Low Diversity and High Intra-Island Variation in Prevalence of Avian *Haemoproteus* Parasites on Barbados, Lesser Antilles. *Parasitology* **2009**, *136*, 1121–1131. <https://doi.org/10.1017/S0031182009990497>
  97. This study
  98. Tinajero, R.; Chapa-Vargas, L.; Ham-Dueñas, J.G.; Santiago-Alarcon, D. Haemosporidian Infection of the American Kestrel in the Southern Chihuahua Desert, Mexico: Relationship with Land Use. *Journal of Ornithology* **2019**, *160*, 699–710. <https://doi.org/10.1007/s10336-019-01640-3>
  99. Tostes, R.; Vashist, U.; Scopel, K.K.; Massard, C.L.; Daemon, E.; D'Agosto, M. *Plasmodium* spp. and *Haemoproteus* spp. Infection in Birds of the Brazilian Atlantic Forest Detected by Microscopy and Polymerase Chain Reaction. *Pesquisa Veterinária Brasileira* **2015**, *35*, 67–74. <https://doi.org/10.1590/S0100-736X2015000100014>
  100. Tostes, R.; Martinele, I.; Vashist, U.; Castañón, M.C.; de Faria Pinto, P.; Daemon, E.; D'Agosto, M. Molecular Characterization and Biochemical and Histopathological Aspects of the Parasitism of *Haemoproteus* Spp. in Southern Caracaras (*Caracara plancus*). *Journal of Parasitology* **2015**, *101*, 687–693. <https://doi.org/10.1645/14-713>
  101. Tostes, R.; Dias, R.J.P.; Martinele, I.; Senra, M.V.X.; D'Agosto, M.; Massard, C.L. Multidisciplinary Re-Description of *Plasmodium* (*Novyella*) *paranucleophilum* in Brazilian Wild Birds of the Atlantic Forest Kept in Captivity. *Parasitology Research* **2017**, *116*, 1887–1897. <https://doi.org/10.1007/s00436-017-5465-3>
  102. Valera, K.; Velásquez, L.; Silva-Sánchez, C.; Arevalo, C.; Palmera, J.R. Hemoparásitos En Aves Columbidae de Venezuela 2012-2015. *Boletín de Malariología y Salud Ambiental* **2017**, *57*.
  103. Valkiunas, G.; Salaman, P.; Iezhova, T.A. Paucity of Hematozoa in Colombian Birds. *Journal of Wildlife Diseases* **2003**, *39*, 445–448. <https://doi.org/10.7589/0090-3558-39.2.445>
  104. Valkiūnas, G.; Iezhova, T.A.; Brooks, D.R.; Hanelt, B.; Brant, S.V.; Sutherlin, M.E.; Causey, D. Additional Observations on Blood Parasites of Birds in Costa Rica. *Journal of Wildlife Diseases* **2004**, *40*, 555–561, doi:10.7589/0090-3558-40.3.555.

- 
105. Valkiūnas, G.; Santiago-Alarcon, D.; Levin, I.I.; Iezhova, T.A.; Parker, P.G. A New Haemoproteus Species (Haemosporida: Haemoproteidae) from the Endemic Galapagos Dove *Zenaida Galapagoensis*, with Remarks on the Parasite Distribution, Vectors, and Molecular Diagnostics. *Journal of Parasitology* **2010**, *96*, 783–792.
  106. Valkiūnas, G.; Iezhova, T.A.; Evans, E.; Carlson, J.S.; Martínez-Gómez, J.E.; Sehgal, R.N. Two New *Haemoproteus* Species (Haemosporida: Haemoproteidae) from Columbiform Birds. *The Journal of Parasitology* **2013**, *99*, 513–521, doi:<https://doi.org/10.1645/12-98.1>.
  107. Valkiūnas, G.; Pendl, H.; Olias, P. New Haemoproteus Parasite of Parrots, with Remarks on the Virulence of Haemoproteids in Naive Avian Hosts. *Acta tropica* **2017**, *176*, 256–262. <https://doi.org/10.1016/j.actatropica.2017.08.004>
  108. Vanstreels, R.E.T.; Kolesnikovas, C.K.; Sandri, S.; Silveira, P.; Belo, N.O.; Ferreira Junior, F.C.; Epiphany, S.; Steindel, M.; Braga, É.M.; Catão-Dias, J.L. Outbreak of Avian Malaria Associated to Multiple Species of *Plasmodium* in Magellanic Penguins Undergoing Rehabilitation in Southern Brazil. *Plos one* **2014**, *9*, e94994, doi:<https://doi.org/10.1371/journal.pone.0094994>.
  109. Vanstreels, R.E.T.; da Silva-Filho, R.P.; Kolesnikovas, C.K.M.; Bhering, R.C.C.; Ruoppolo, V.; Epiphany, S.; Amaku, M.; Junior, F.C.F.; Braga, É.M.; Catão-Dias, J.L. Epidemiology and Pathology of Avian Malaria in Penguins Undergoing Rehabilitation in Brazil. *Veterinary research* **2015**, *46*, 1–12. <https://doi.org/10.1186/s13567-015-0160-9>
  110. Vanstreels, R.E.T.; Capellino, F.; Silveira, P.; Braga, É.M.; Rodríguez-Heredia, S.A.; Loureiro, J.; Catão-Dias, J.L. Avian Malaria (*Plasmodium* spp.) in Captive Magellanic Penguins (*Spheniscus magellanicus*) from Northern Argentina, 2010. *Journal of Wildlife Diseases* **2016**, *52*, 734–737. <https://doi.org/10.7589/2015-08-219>
  111. Vanstreels, R.E.T.; Dutra, D. de A.; Ferreira-Junior, F.C.; Hurtado, R.; Egert, L.; Mayorga, L.F.S.; Bhering, R.C.; Braga, É.M.; Catão-Dias, J.L. Epidemiology, Hematology, and Unusual Morphological Characteristics of Plasmodium during an Avian Malaria Outbreak in Penguins in Brazil. *Parasitology research* **2019**, *118*, 3497–3508, doi:<https://doi.org/10.1007/s00436-019-06459-8>.
  112. Vanstreels, R.E.; de Angeli Dutra, D.; Santos, A.P.; Hurtado, R.; Egert, L.; Braga, É.M. First Report of Avian Malaria in a Manx Shearwater (*Puffinus puffinus*). *Parasitology International* **2020**, *78*, 102148. <https://doi.org/10.1016/j.parint.2020.102148>
  113. Vanstreels, R.E.T.; Dos Anjos, C.C.; Leandro, H.J.; de Moraes Carvalho, A.; Santos, A.P.; Egert, L.; Hurtado, R.; de Carvalho, E.C.Q.; Braga, É.M.; Kirchgatter, K. A New Haemosporidian Parasite from the Red-Legged Seriema *Cariama cristata*

- 
- (Cariamiformes, Cariamidae). *International Journal for Parasitology: Parasites and Wildlife* **2022**, 18, 12–19. <https://doi.org/10.1016/j.ijppaw.2022.02.009>
114. Villar, C.M.; Bryan Jr, A.L.; Lance, S.L.; Braga, E.M.; Congrains, C.; Del Lama, S.N. Blood Parasites in Nestlings of Wood Stork Populations from Three Regions of the American Continent. *The Journal of parasitology* **2013**, 99, 522–527. <https://doi.org/10.1645/12-73.1>
115. Werther, K.; de Cássia Luzzi, M.; Gonçalves, L.R.; de Oliveira, J.P.; Junior, J.R.F.A.; Machado, R.Z.; André, M.R. Arthropod-Borne Agents in Wild Orinoco Geese (*Neochen jubata*) in Brazil. *Comparative Immunology, Microbiology and Infectious Diseases* **2017**, 55, 30–41. <https://doi.org/10.1071/PC110011>
116. White, E.M.; Bennett, G.F.; Williams, N.A. Avian Haemoproteidae. 11. The Haemoproteids of the Hummingbird Family Trochilidae. *Canadian journal of Zoology* **1979**, 57, 908–913, doi:<https://doi.org/10.1139/z79-111>.
117. Woodworth-Lynas, C.B.; Caines, J.R.; Bennett, G.F.; Woodworth-Lynas, C.B.; Caines, J.R.; Bennett, G.F. Prevalence of Avian Haematozoa in São Paulo State, Brazil. *Memórias do Instituto Oswaldo Cruz* **1989**, 84, 515–526, doi:10.1590/S0074-02761989000400009.
118. Yanga, S.; Martinez-Gomez, J.E.; Sehgal, R.N.; Escalante, P.; Camacho, F.C.; Bell, D.A. A Preliminary Survey for Avian Pathogens in Columbiform Birds on Socorro Island, Mexico. *Pacific Conservation Biology* **2011**, 17, 11–20. <https://doi.org/10.1071/PC110011>
119. Young, B.E.; Garvin, M.C.; McDonald, D.B. Blood parasites in birds from Monteverde, Costa Rica. *Journal of Wildlife Diseases* **1993**, 29, 555–560, doi:10.7589/0090-3558-29.4.555. <https://doi.org/10.7589/0090-3558-29.4.555>
120. Benedikt, V.; Barus, V.; Capek, M.; Havlicek, M.; Literak, I. Blood Parasites (*Haemoproteus* and *Microfilariae*) in Birds from the Caribbean Slope of Costa Rica. *Acta Parasitologica* **2009**, 54, 197–204. <https://doi.org/10.2478/s11686-009-0043-1>
121. González-Olvera, M.; Hernandez-Colina, A.; Pérez, J.G.; Ulloa, G.M.; Montero, S.; Maguiña, J.L.; Lescano, A.G.; Santolalla, M.L.; Baylis, M.; Mayor, P. Haemosporidians from a Neglected Group of Terrestrial Wild Birds in the Peruvian Amazonia. *EcoHealth* **2022**, 19, 1–15. <https://doi.org/10.1007/s10393-022-01612-9>
